# Supplementary material for: RNA-Sequence Analysis of Primary Alveolar Macrophages after In Vitro Infection with Porcine Reproductive and Respiratory Syndrome Virus Strains of Differing Virulence
Source: PubMed Central journal article supplement (PMC3958415; doi:10.1371/journal.pone.0091918), 2014-03-18

Group 1: un-spliced and  
transcriptionally regulated genes

# CCL4

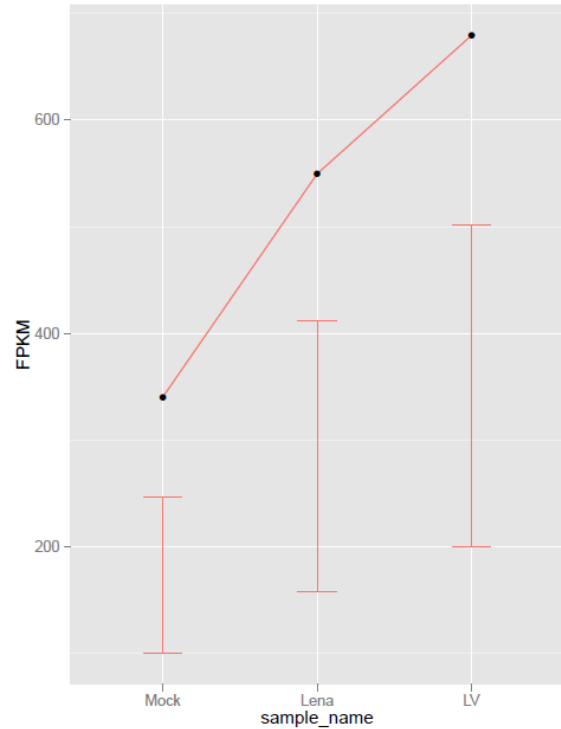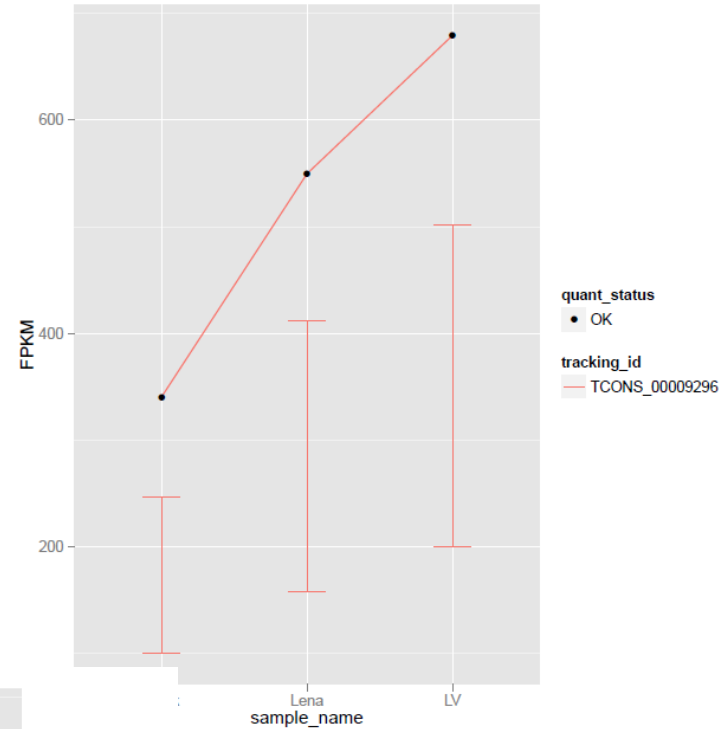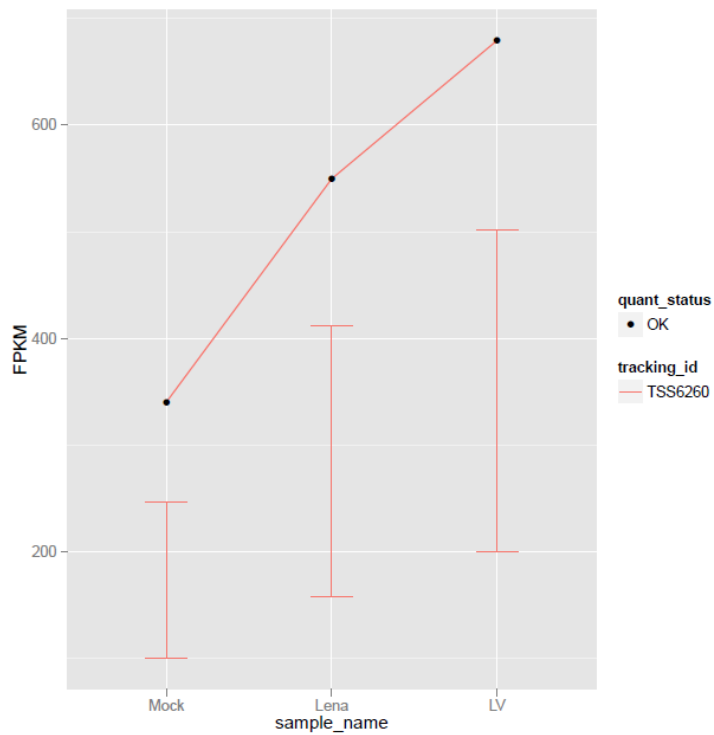

# CCL2

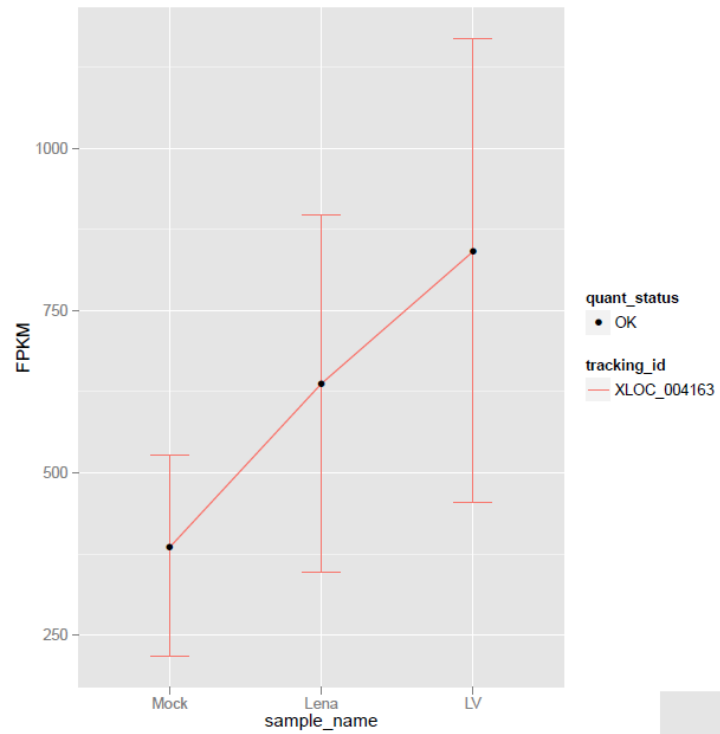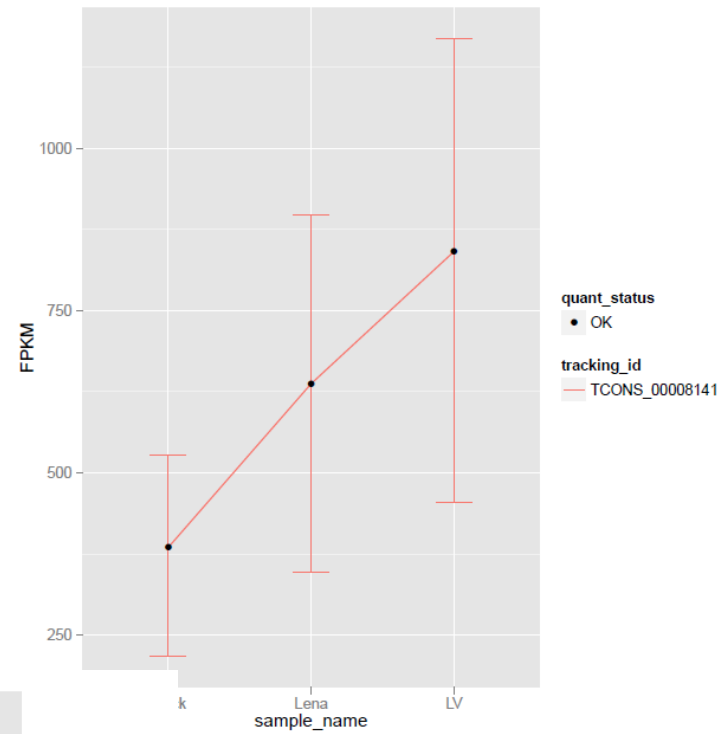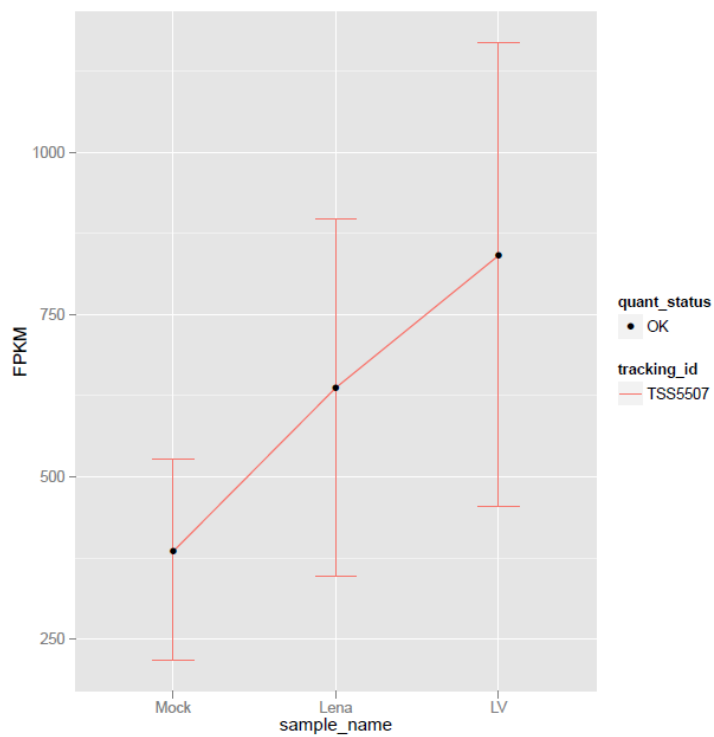

# CCR5

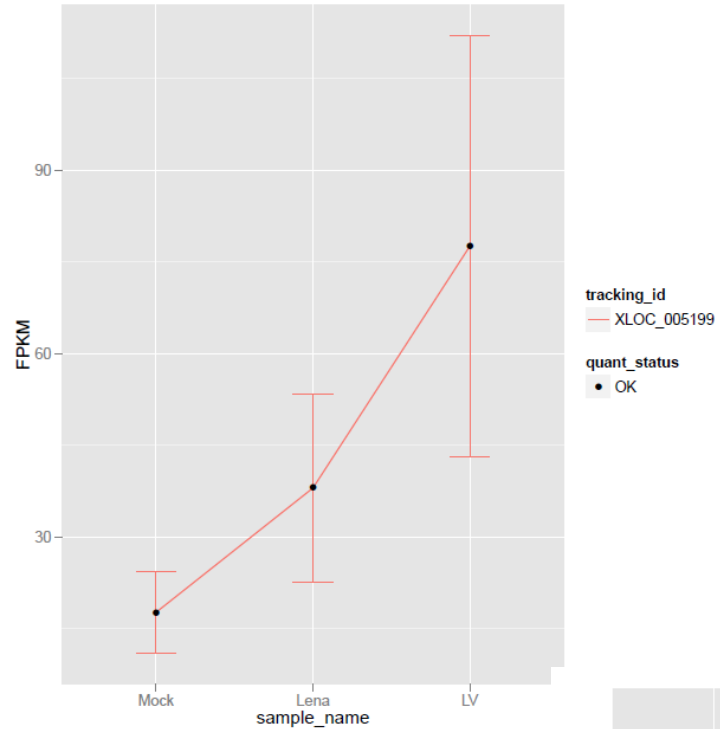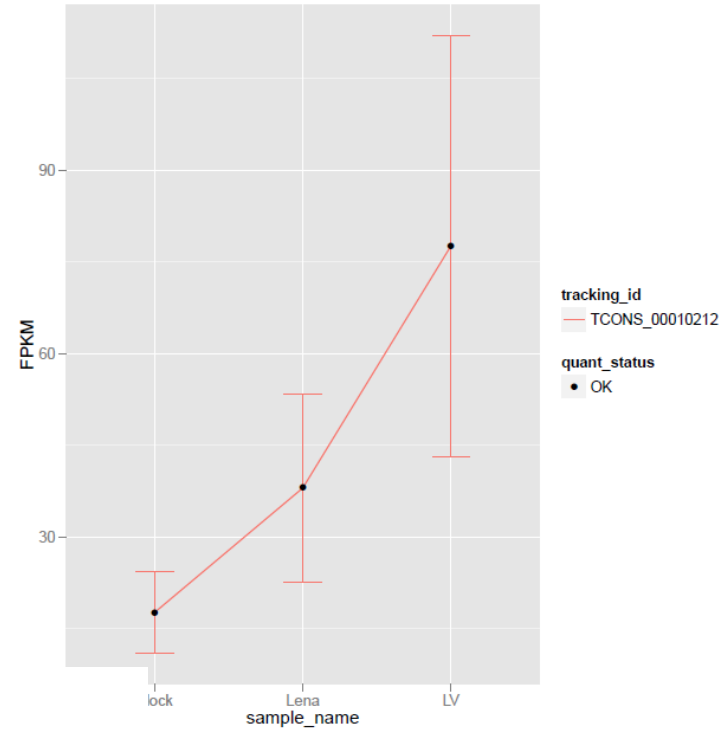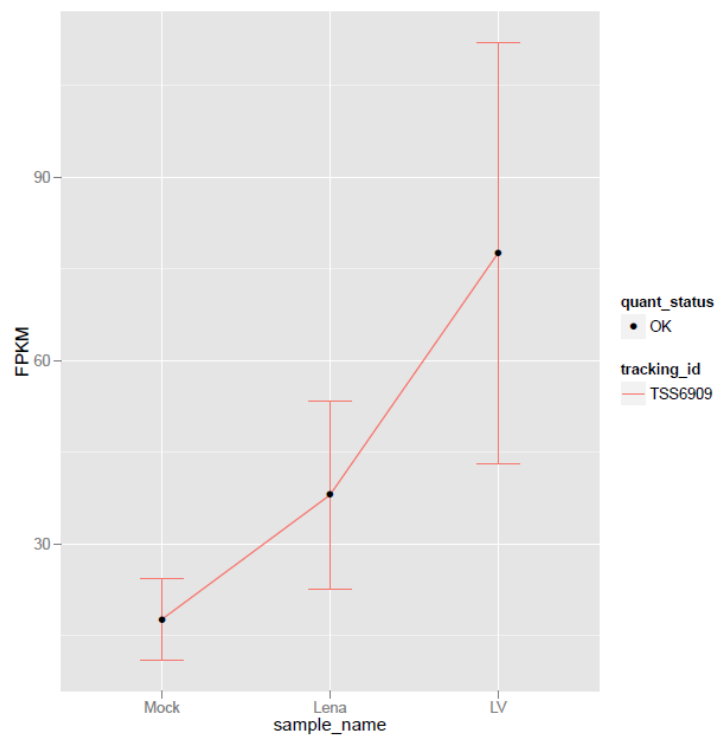

# IL8

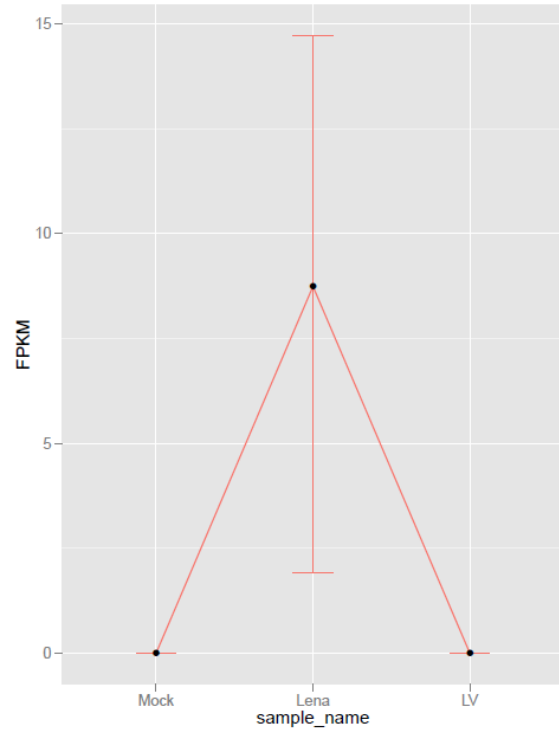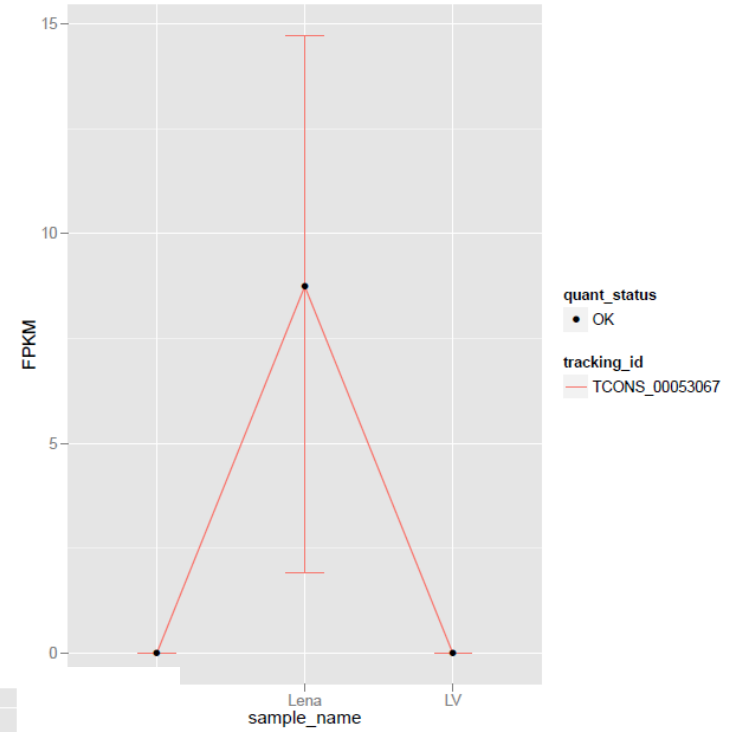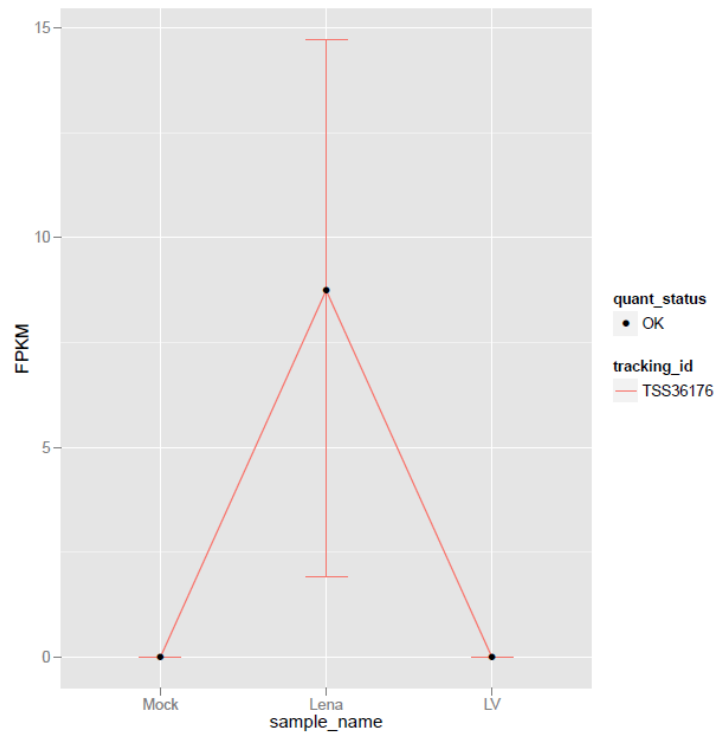

# TNF

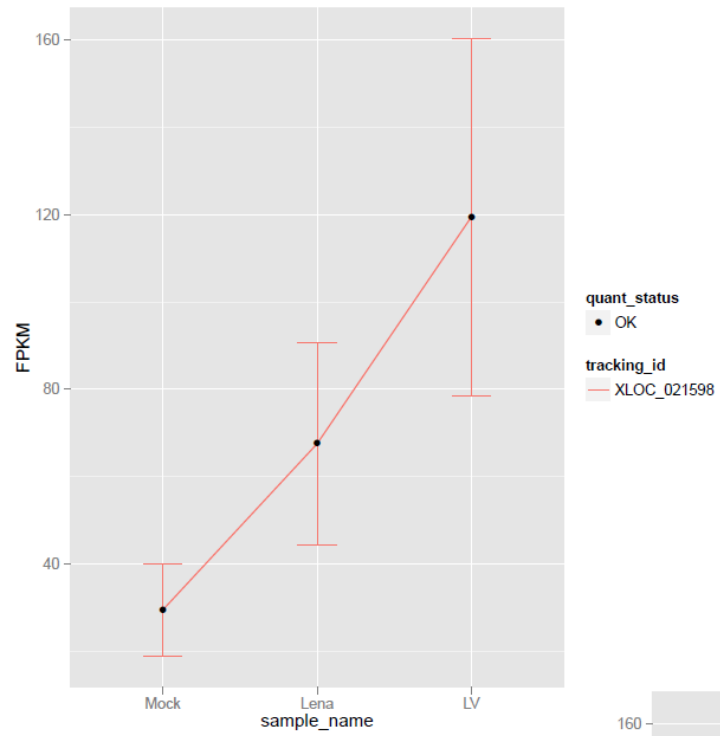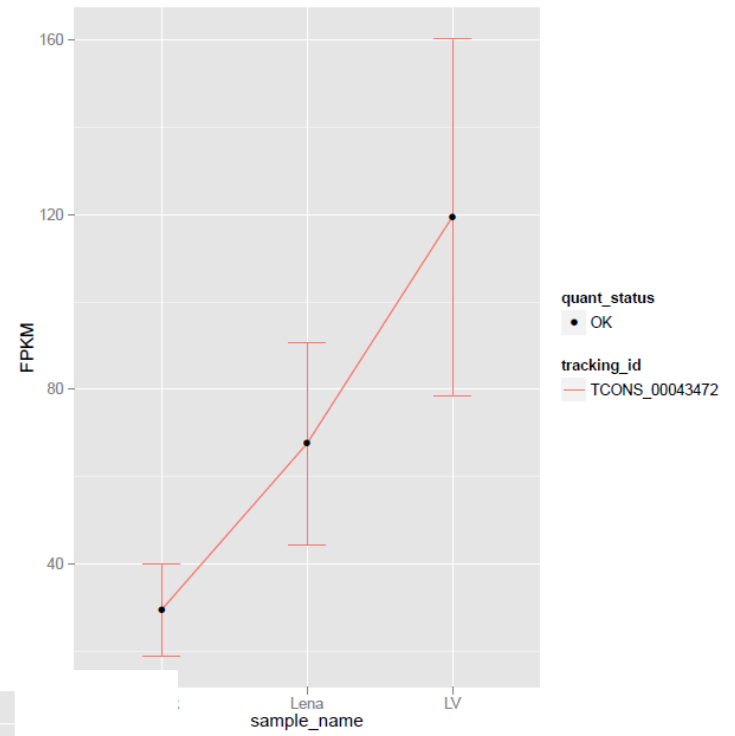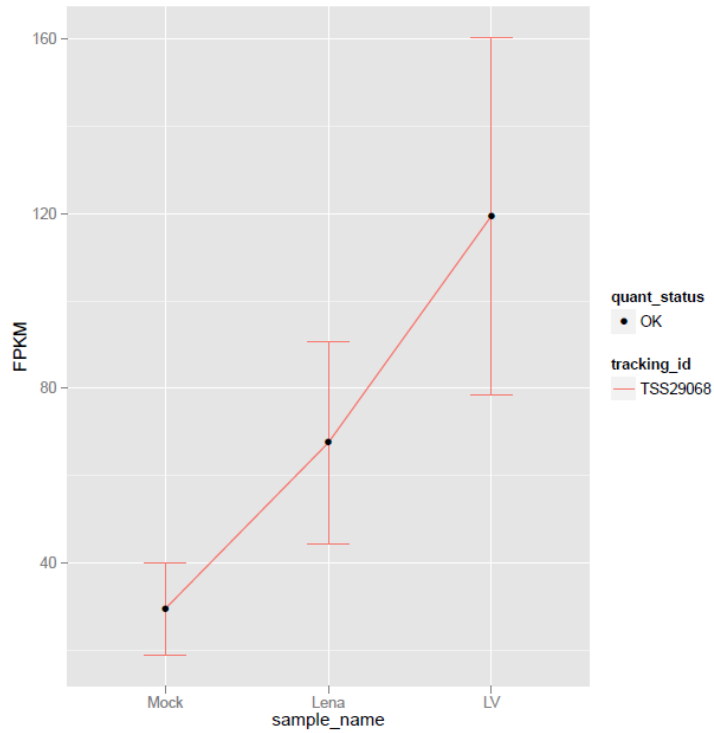

# BID

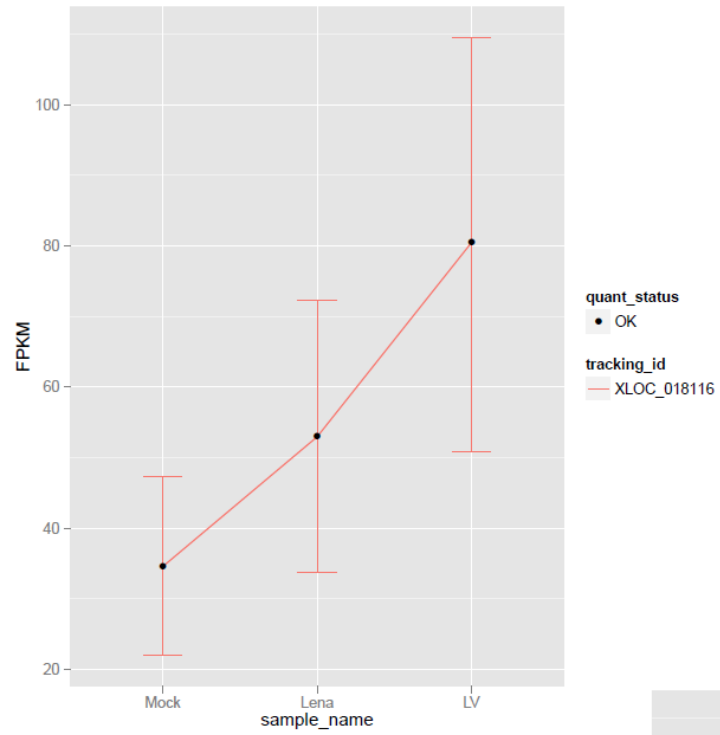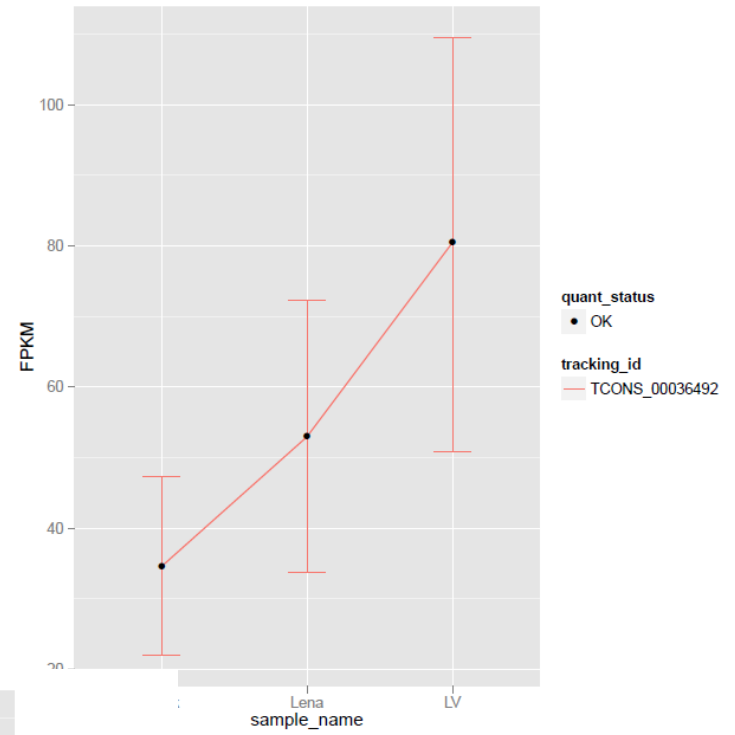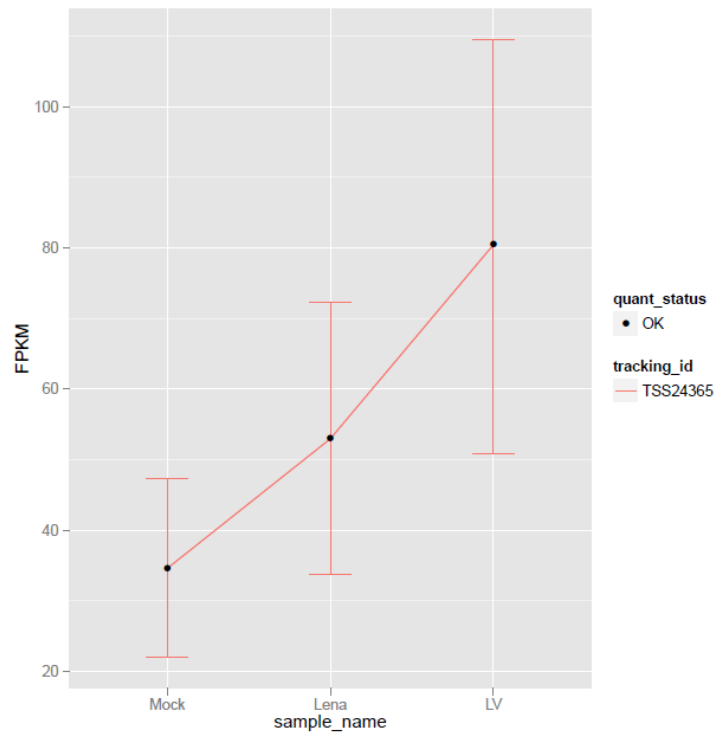

# ZC3HAV1

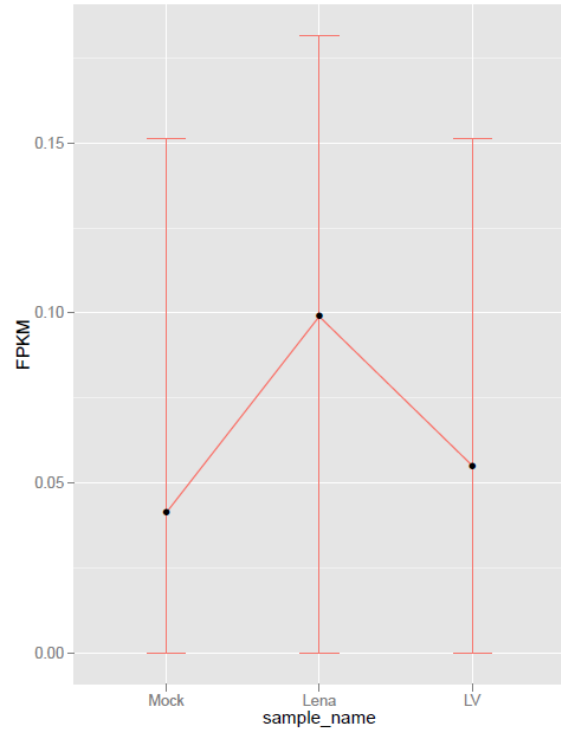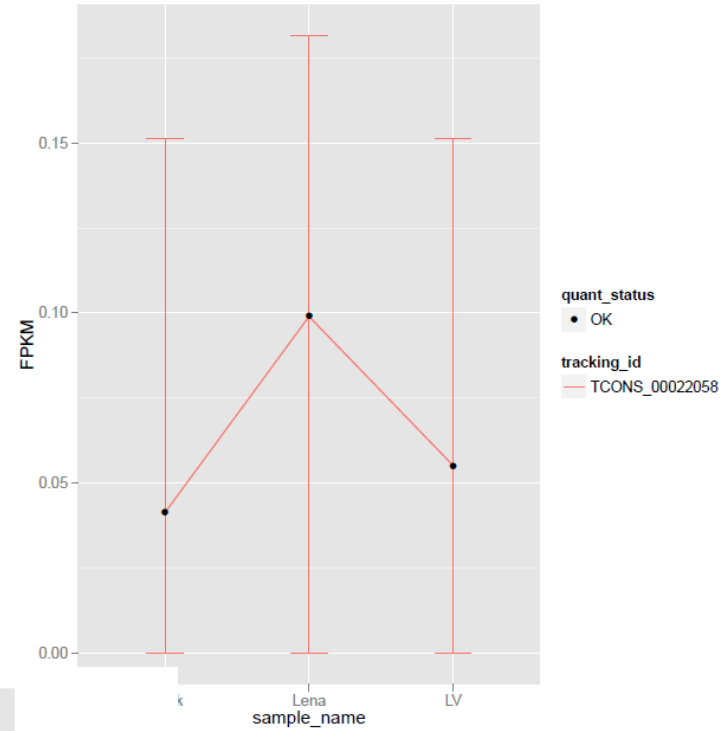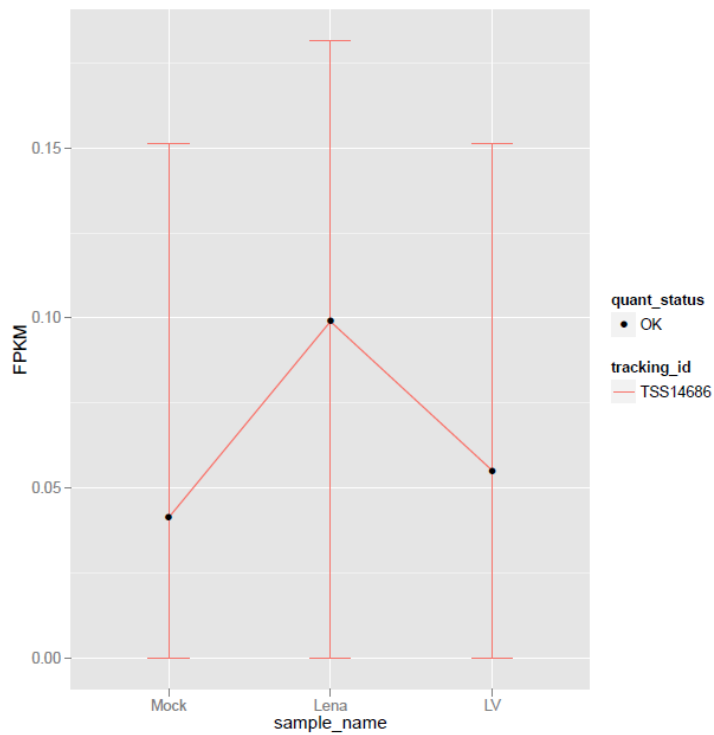



# CASP8

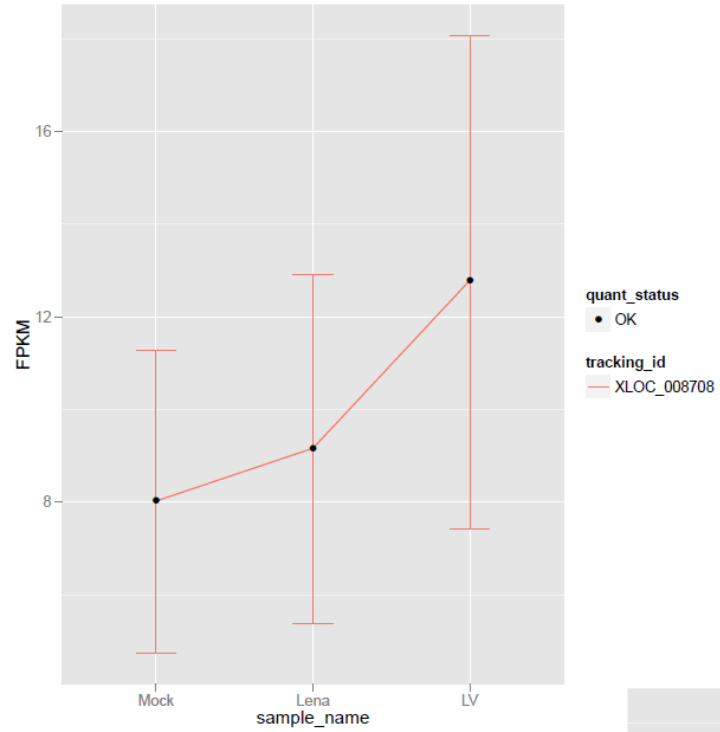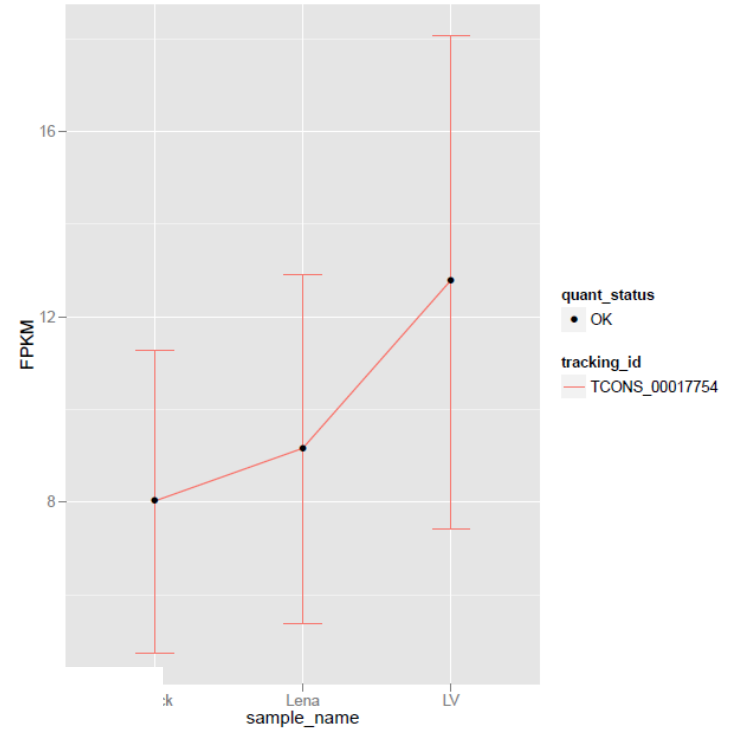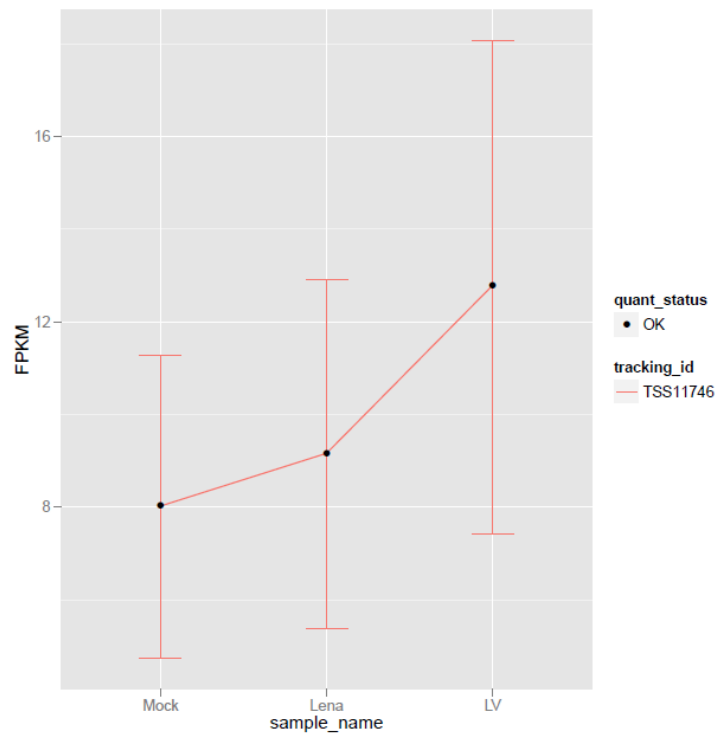

# TLR4

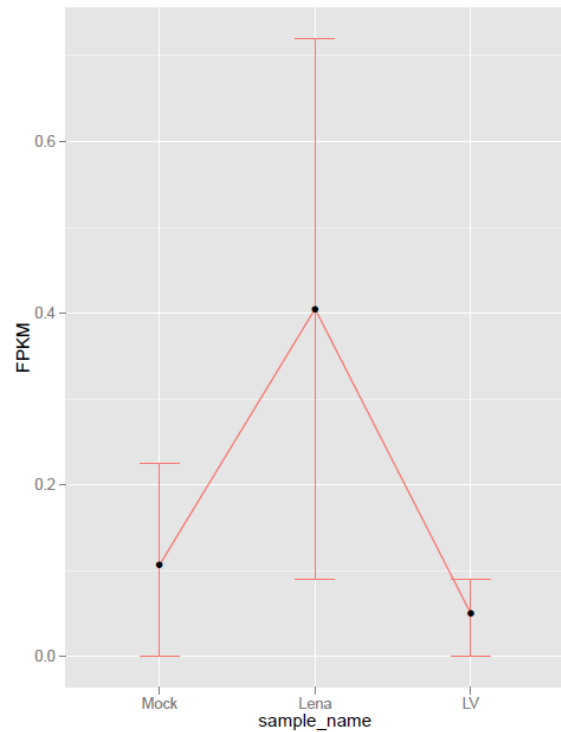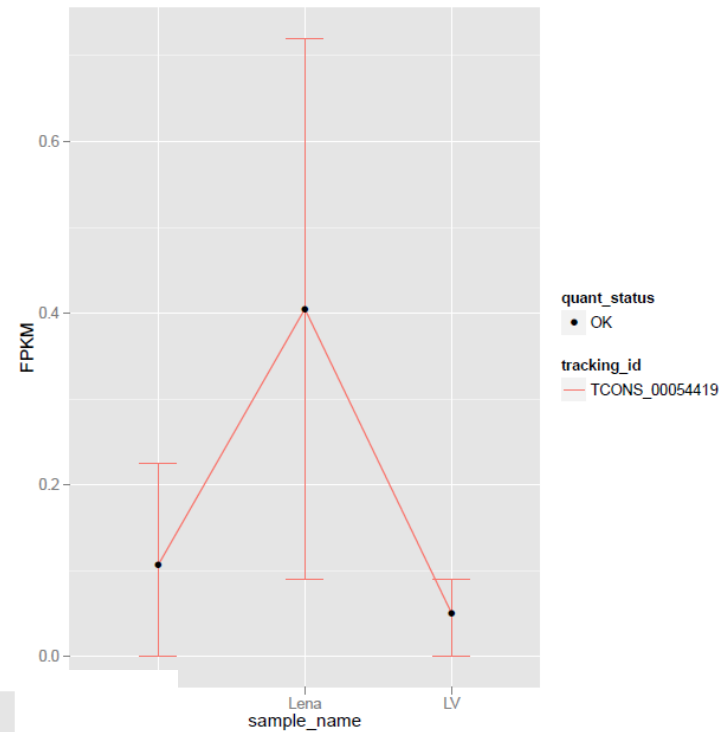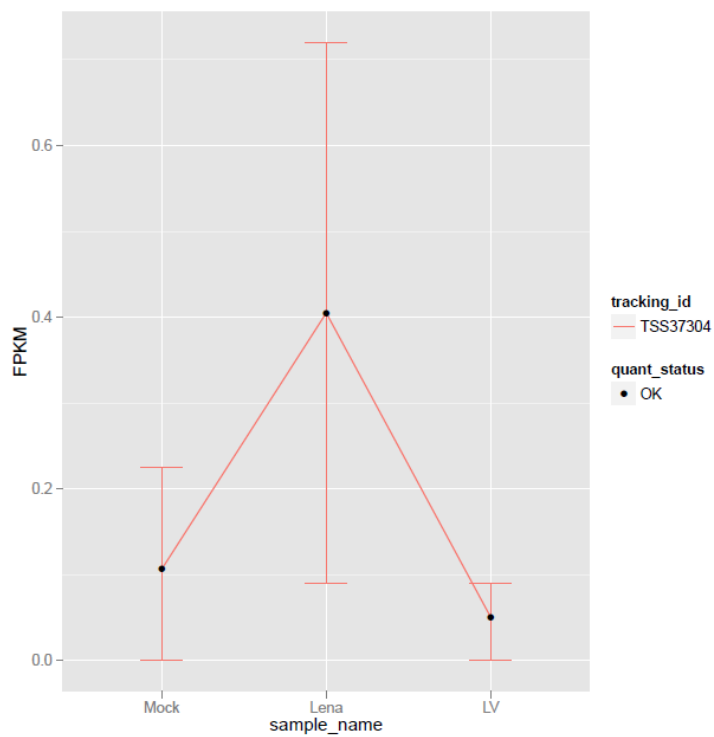

Group 2: Spliced and post-transcriptionally regulated" genes

# SOCS1

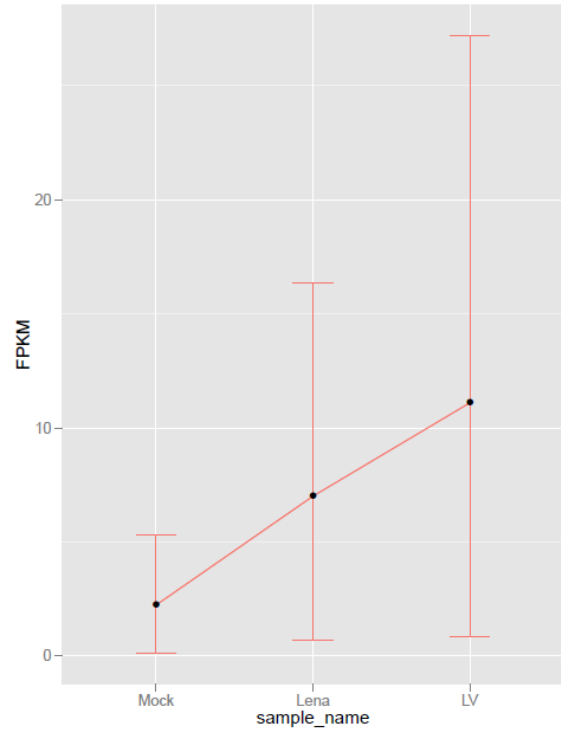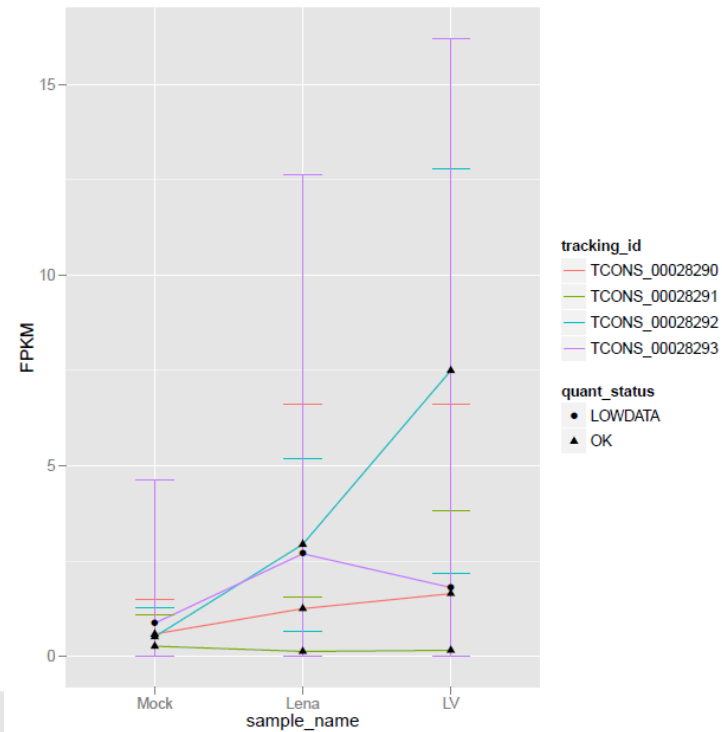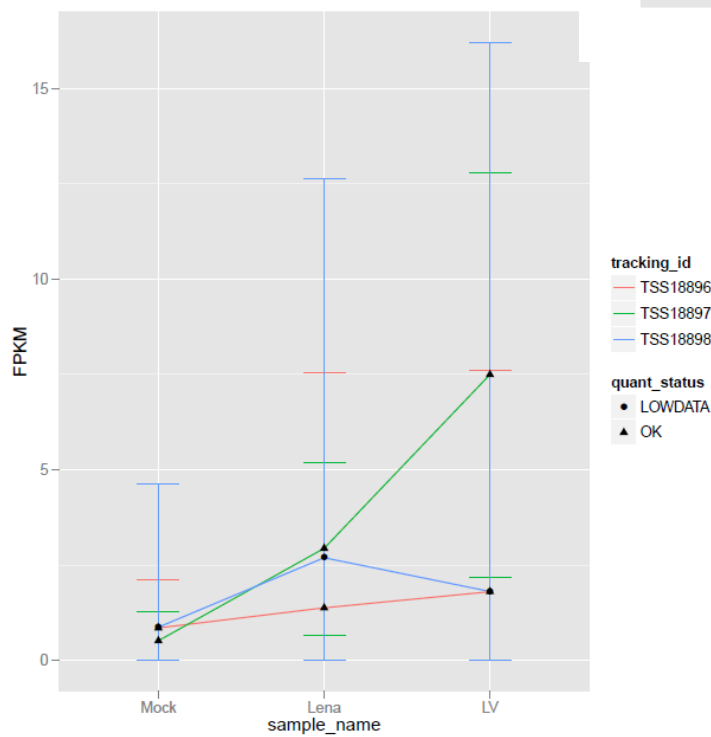

# STAT2

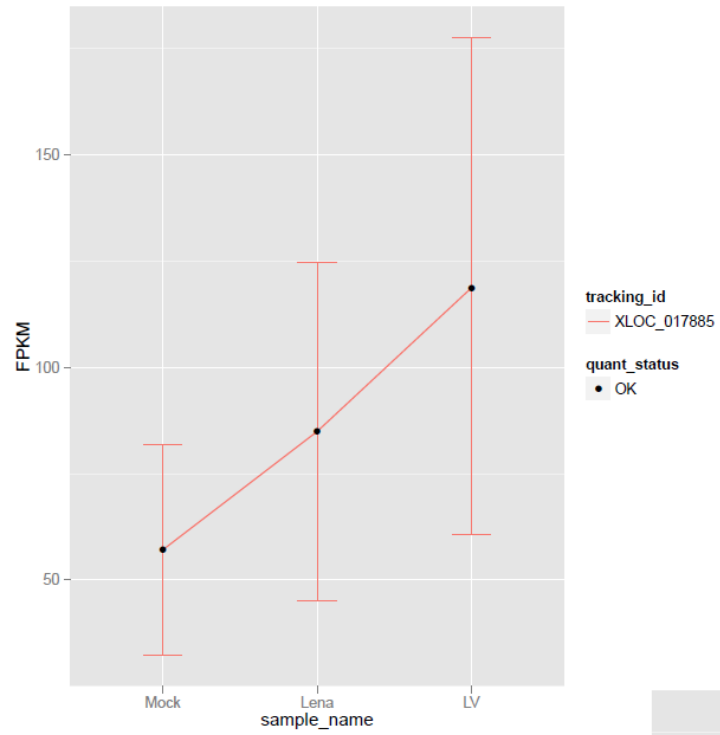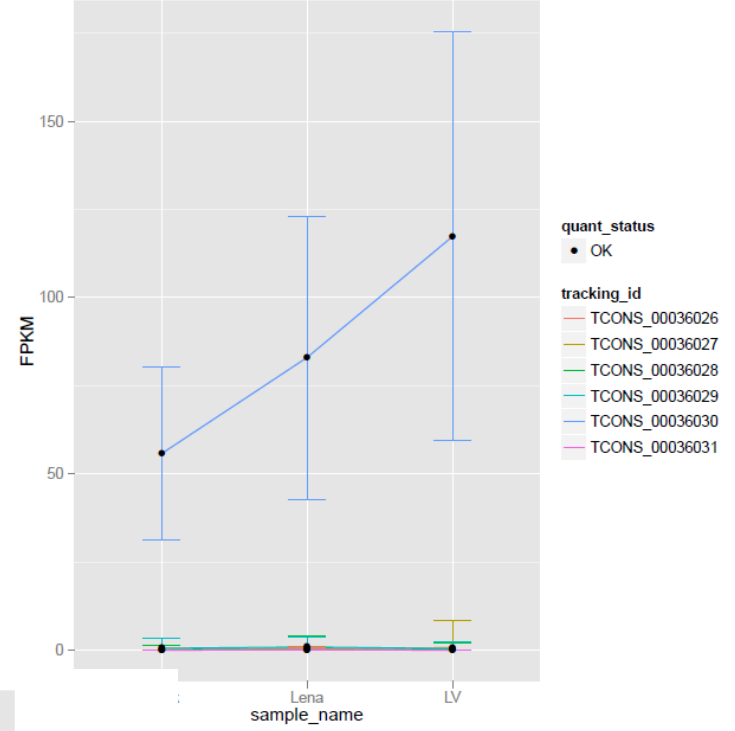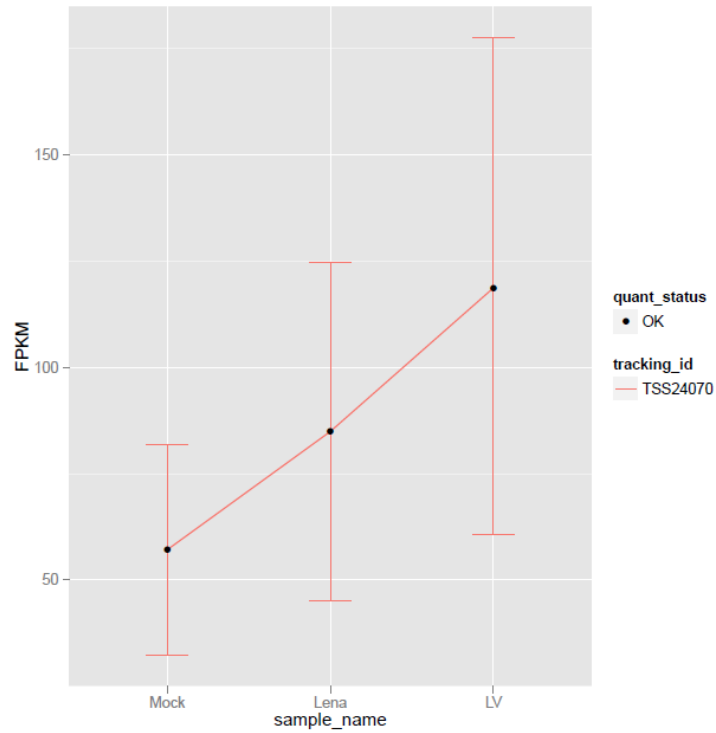

# OAS2

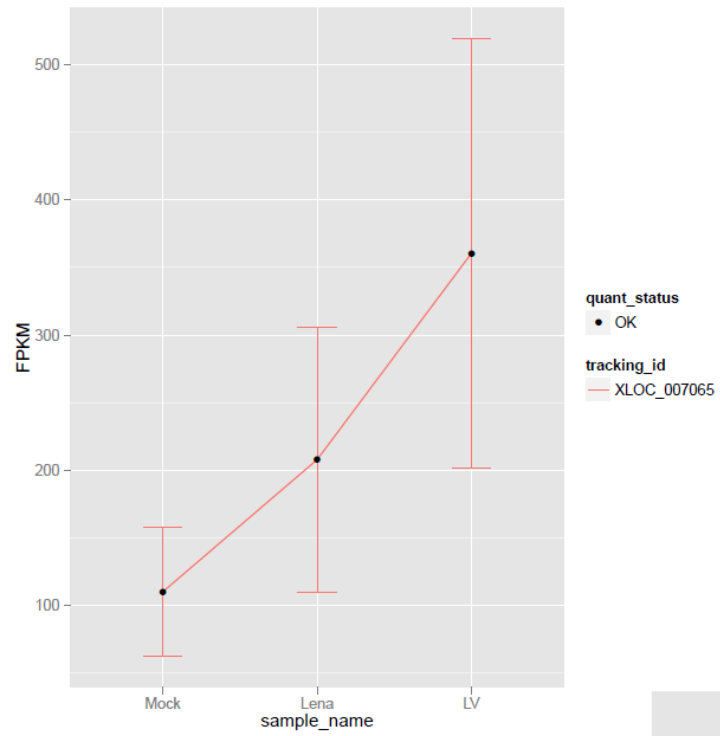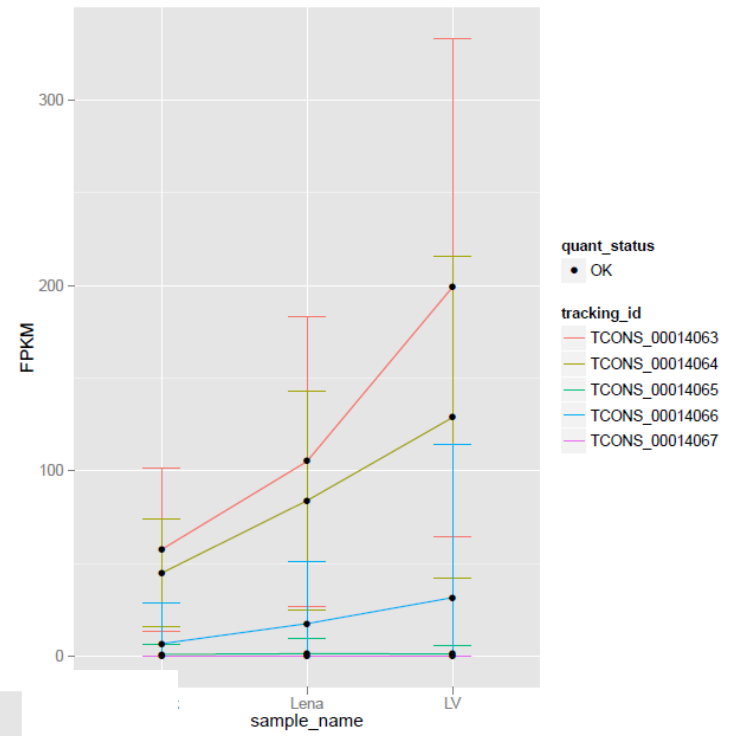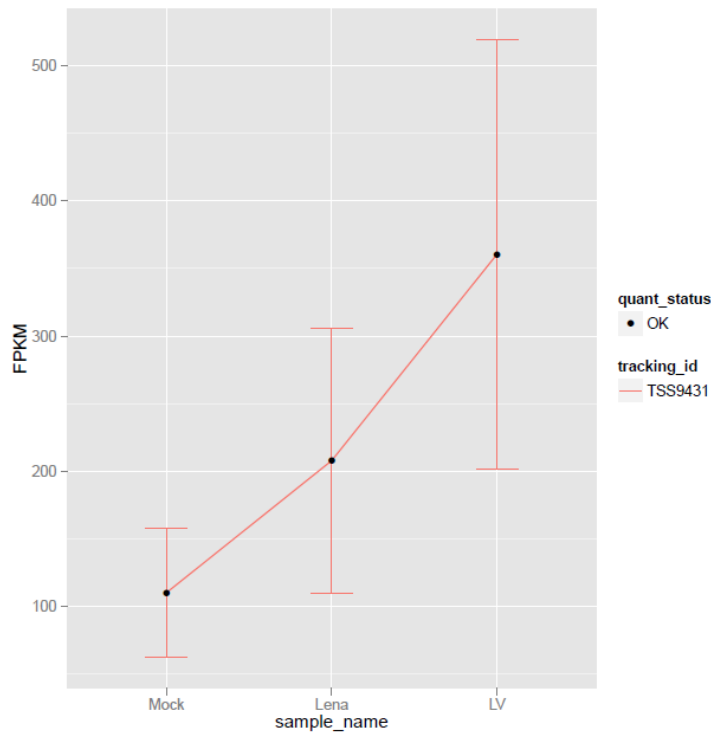

# IL1B

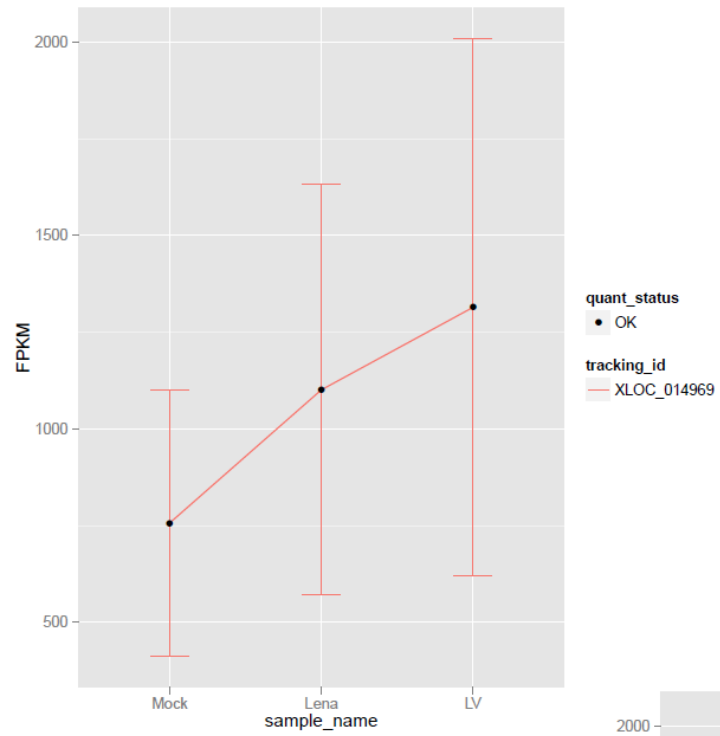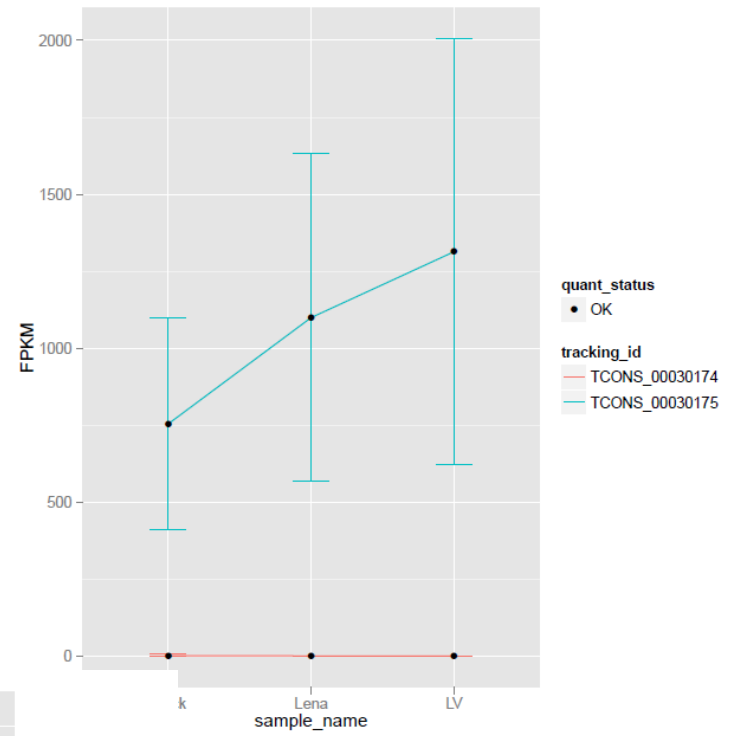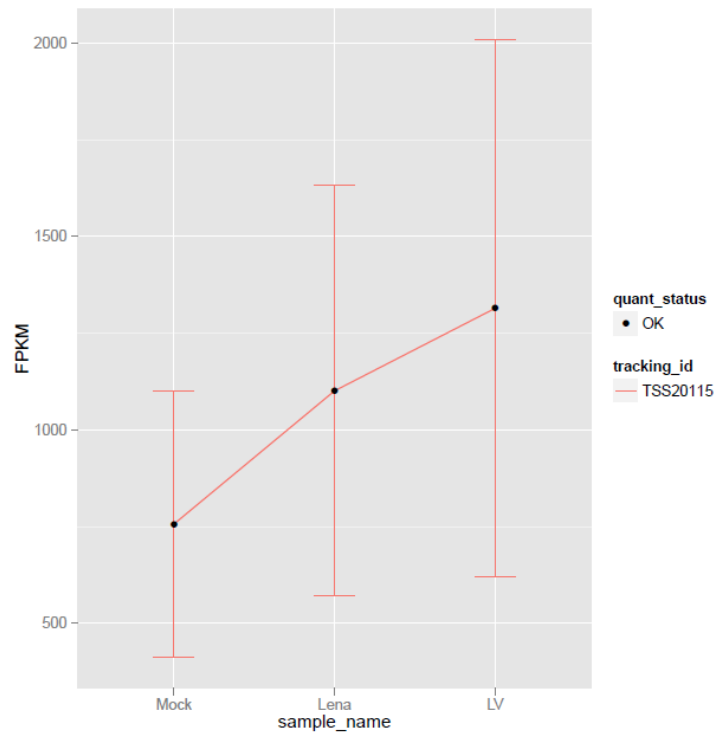

# CASP1

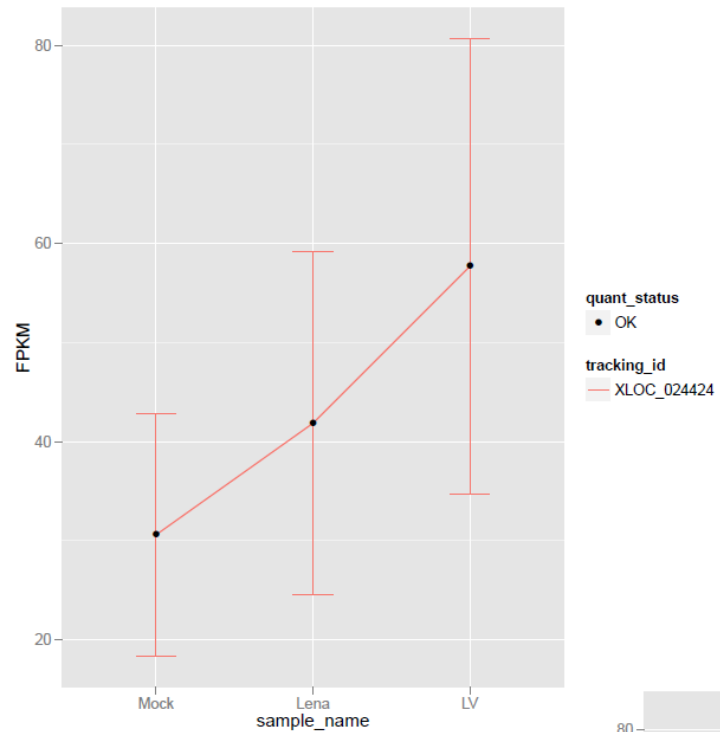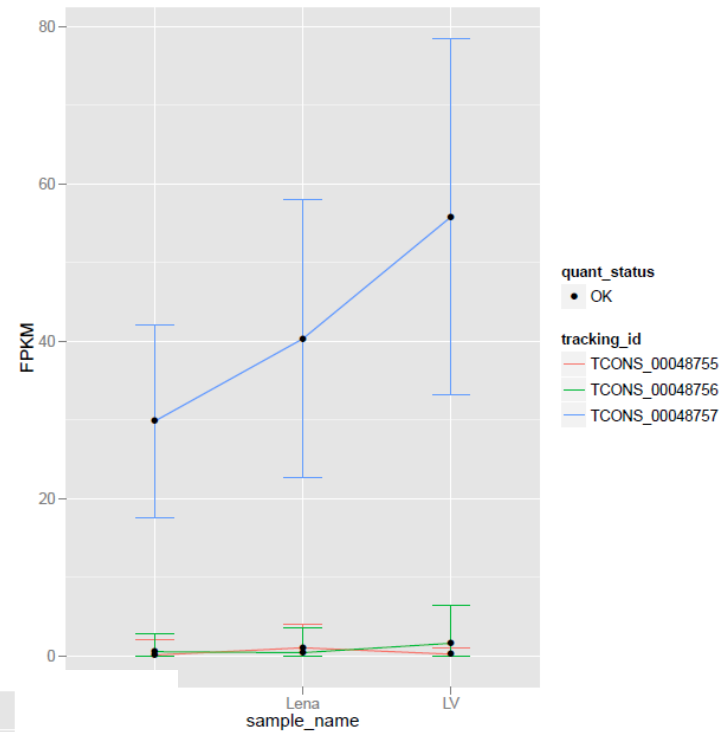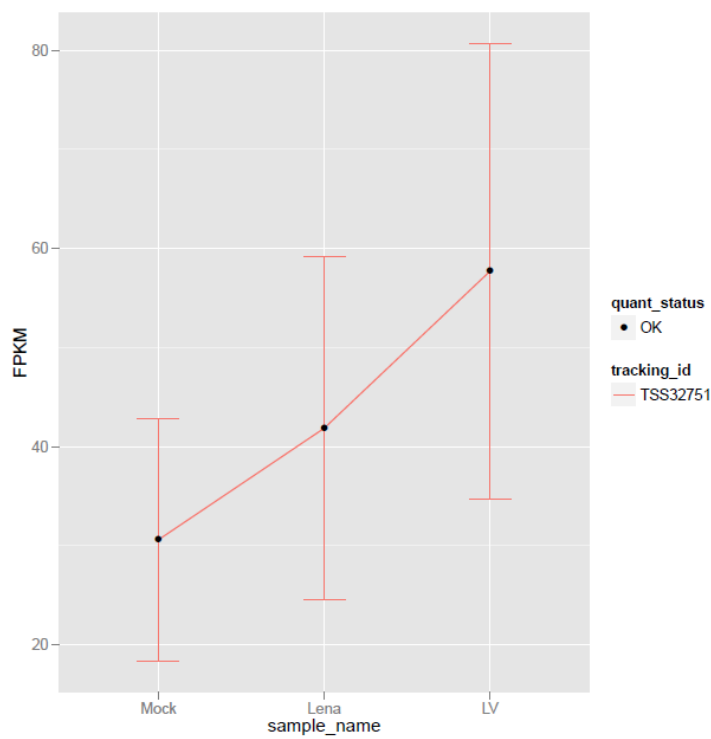



# IRF7

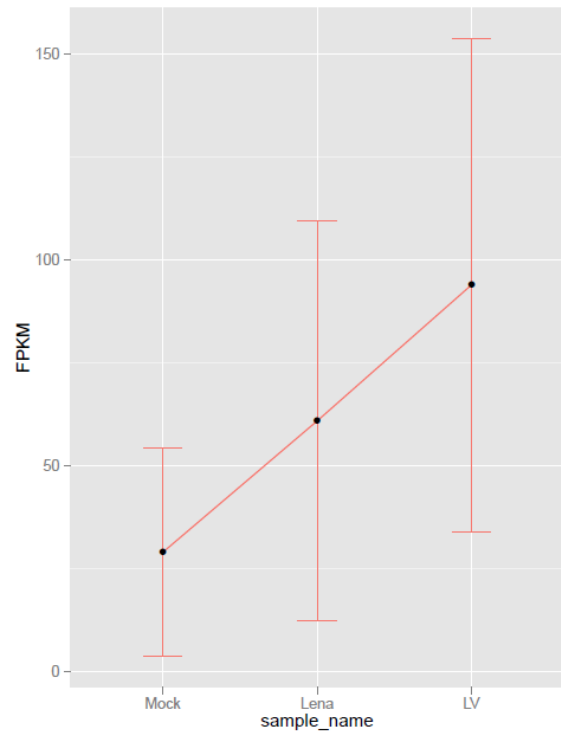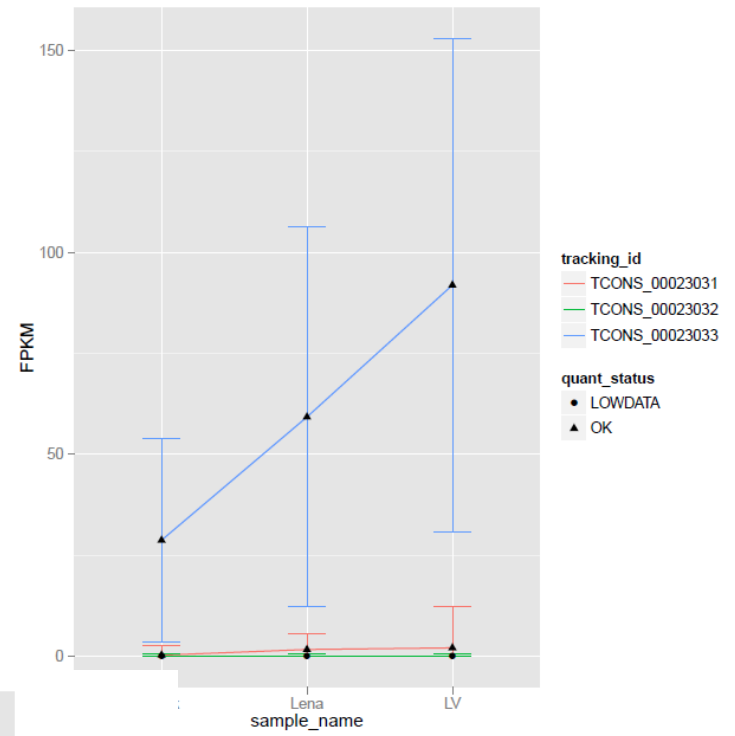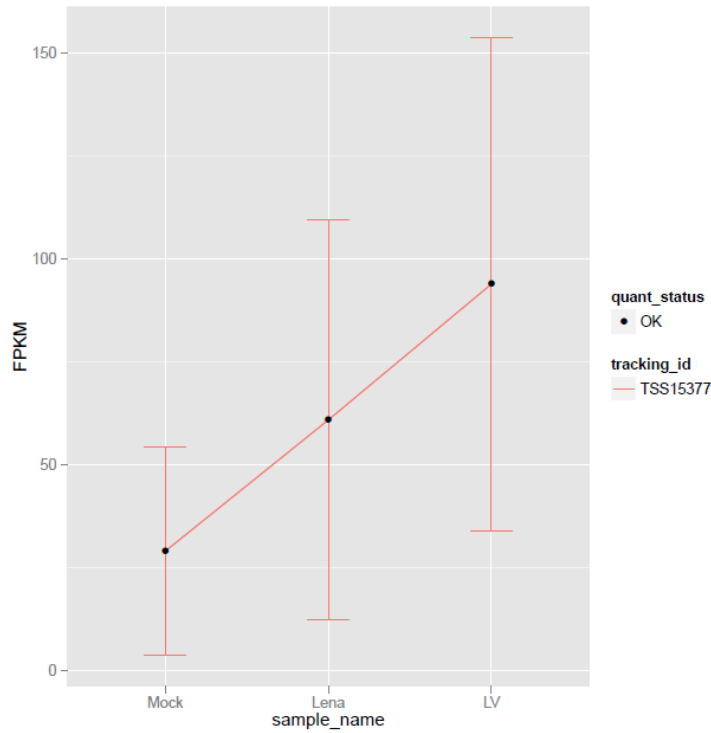

# MICB

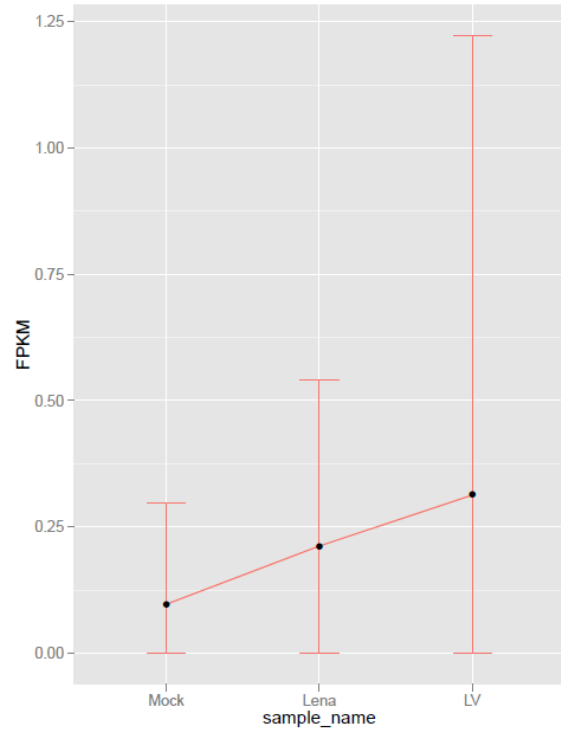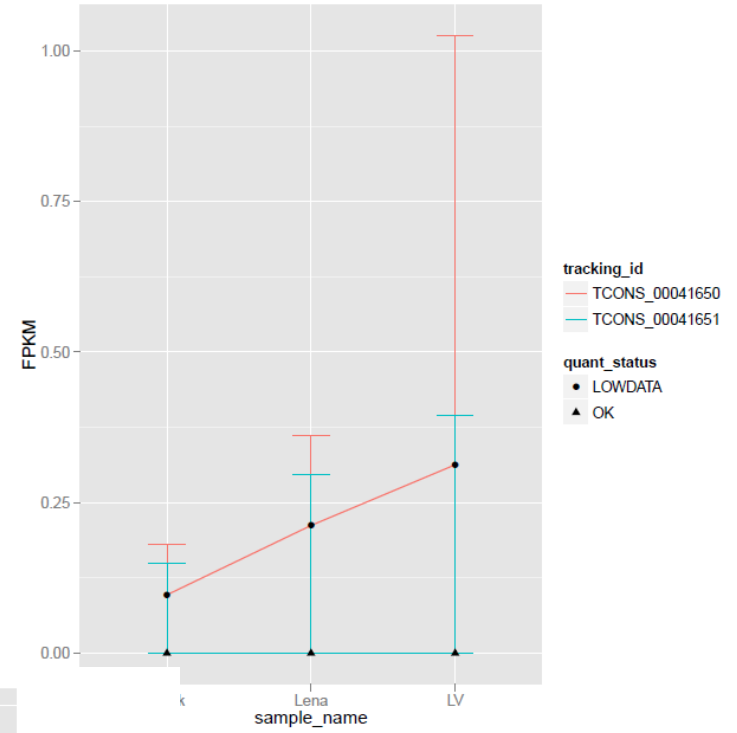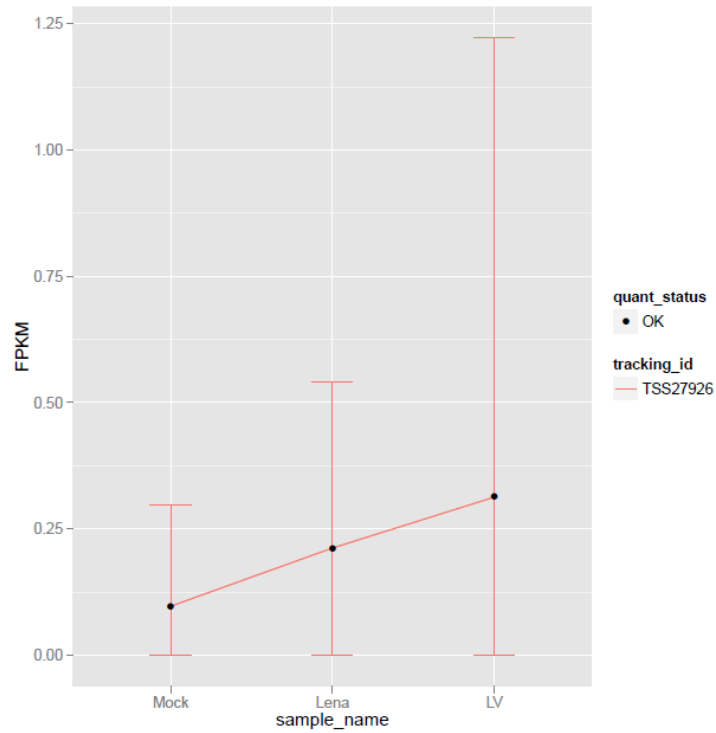

# TIPARP

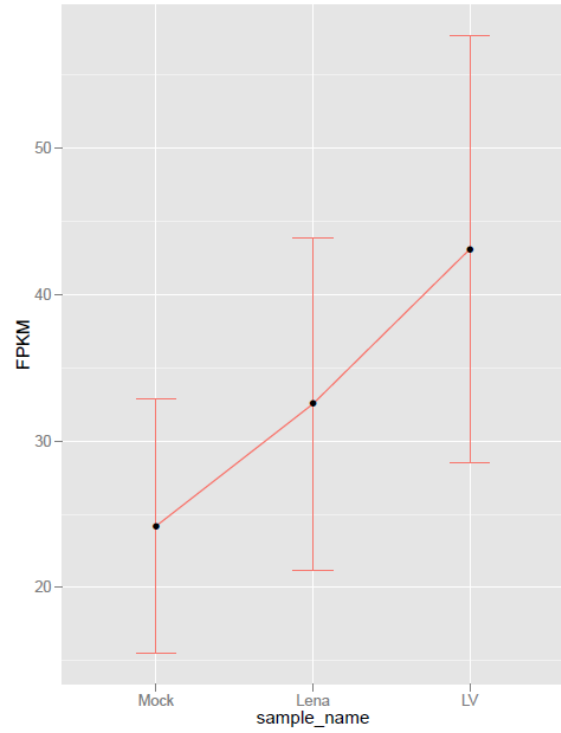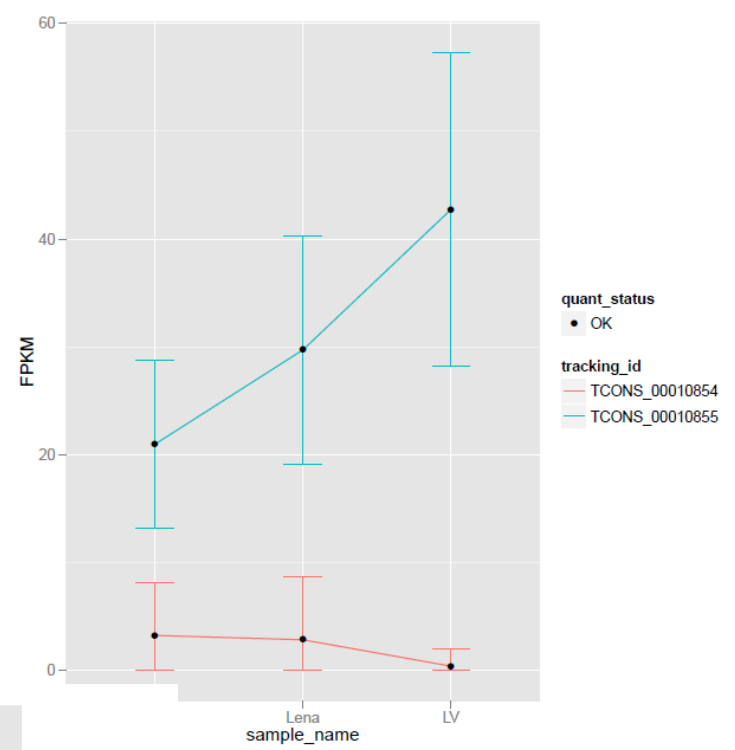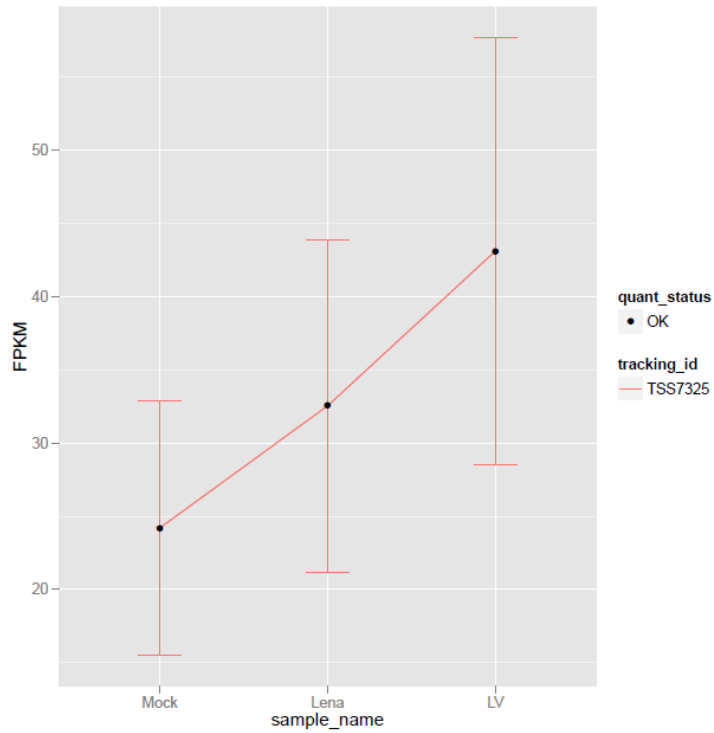

# STAT1

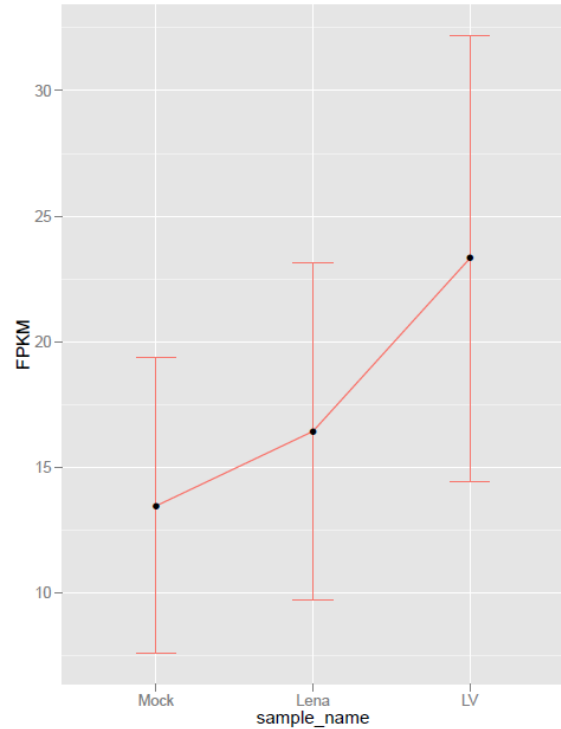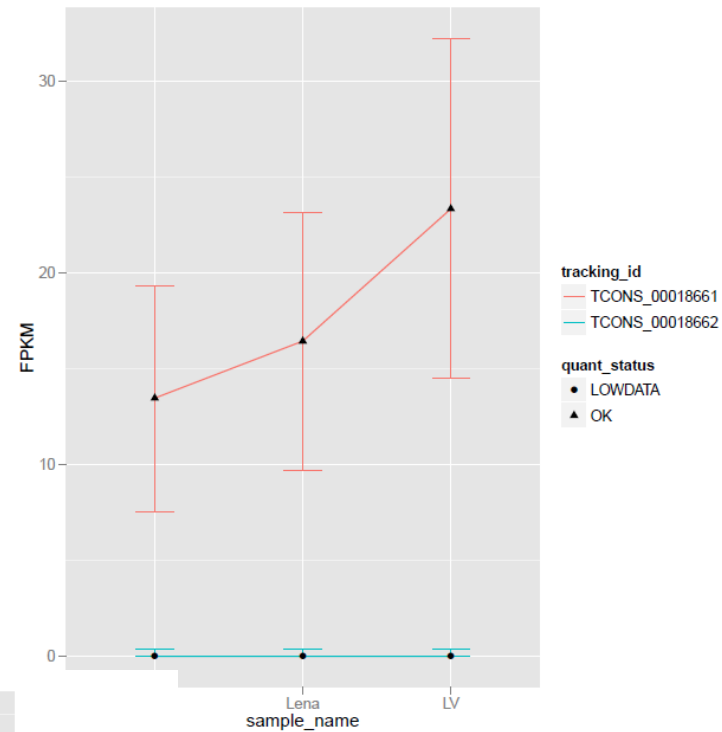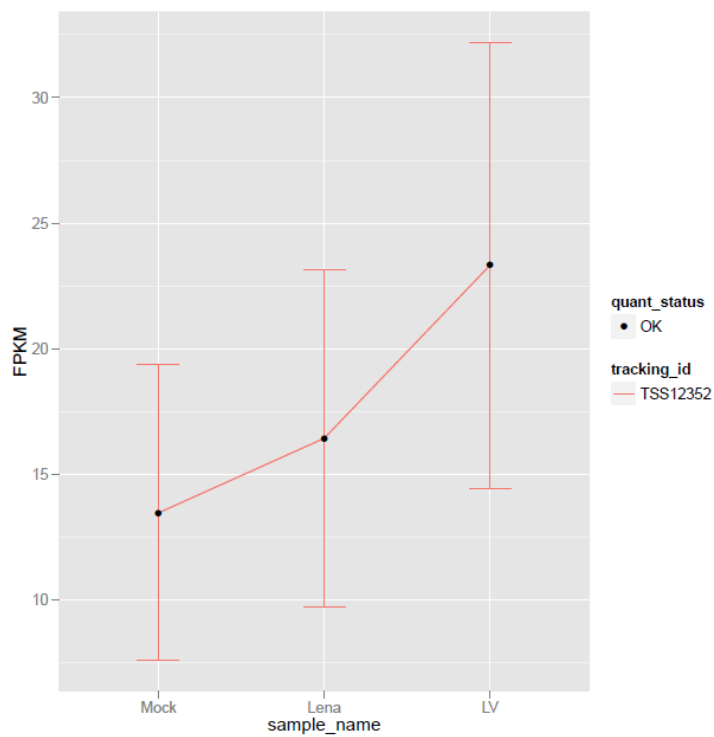

# IFNB1

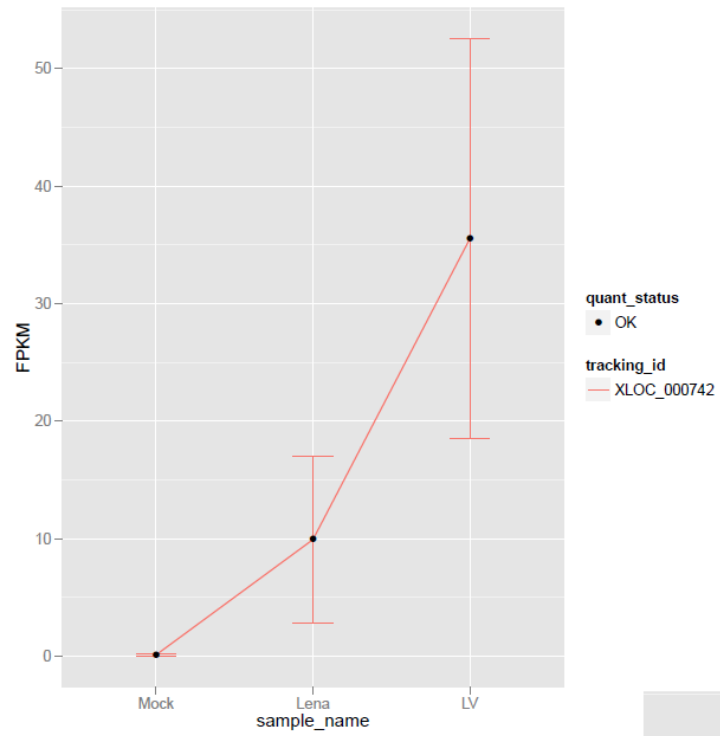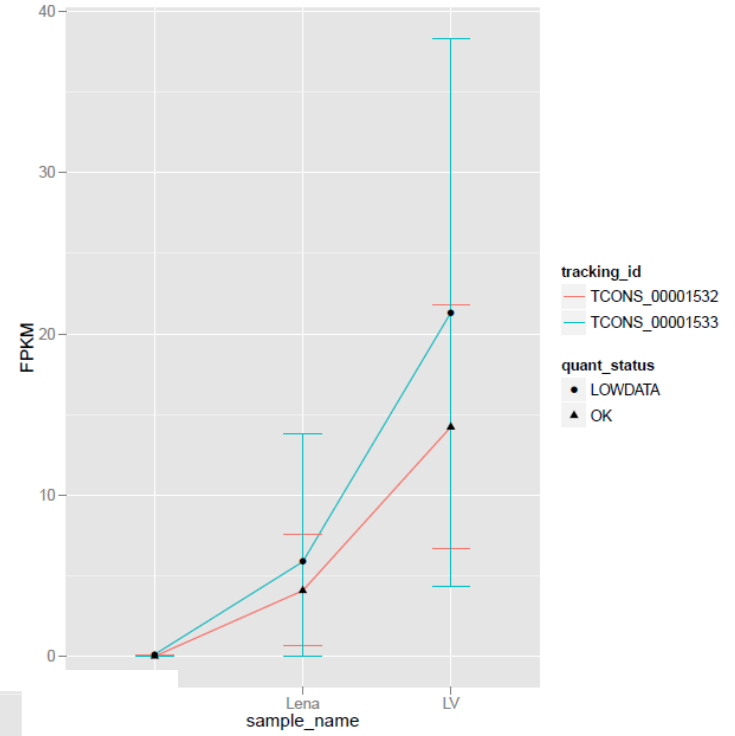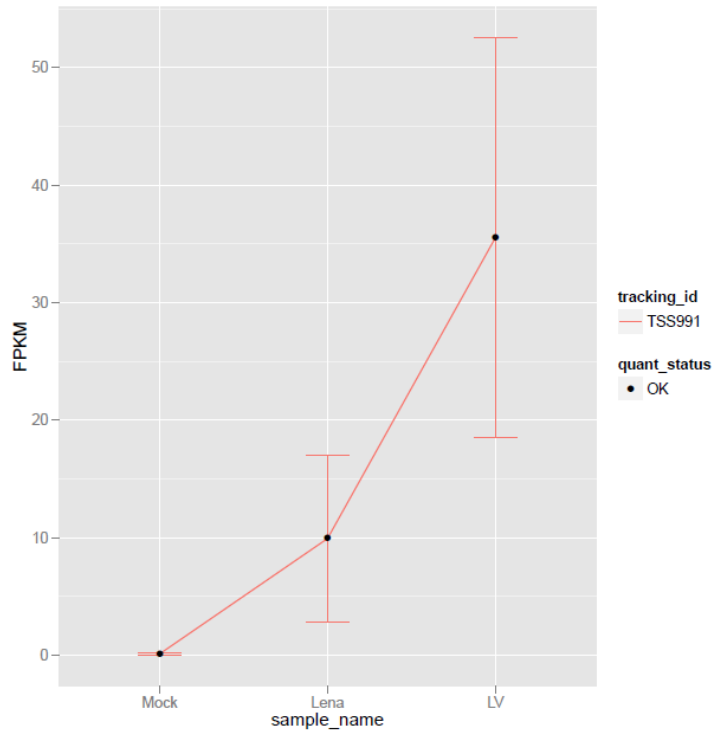

Group 3:

Spliced and both transcriptionally and  
post-transcriptionally regulated

# IFIT3

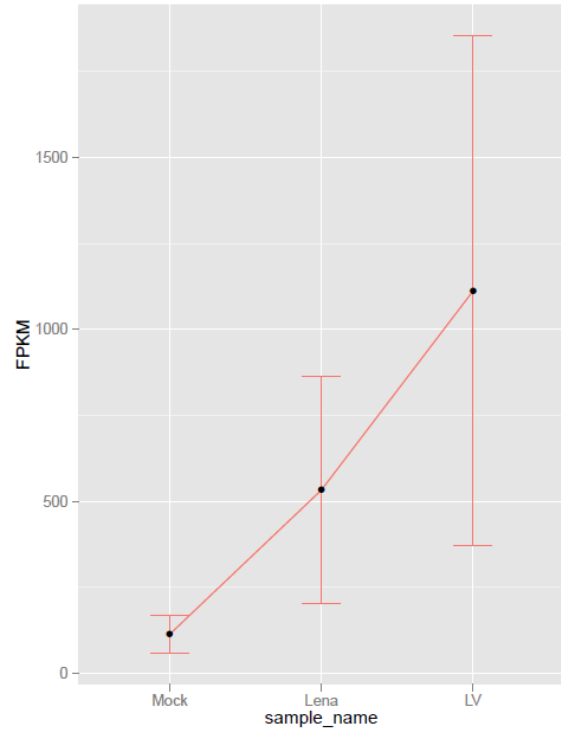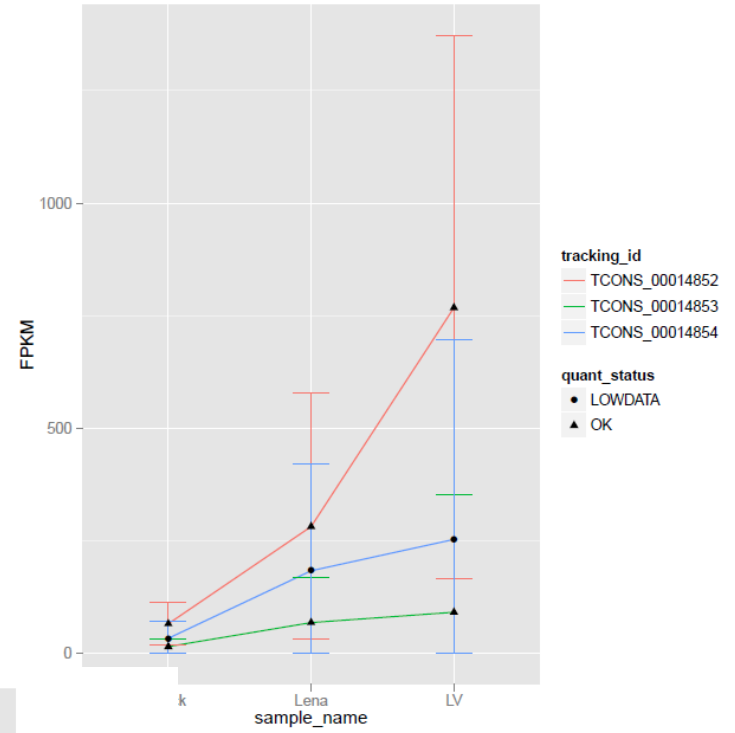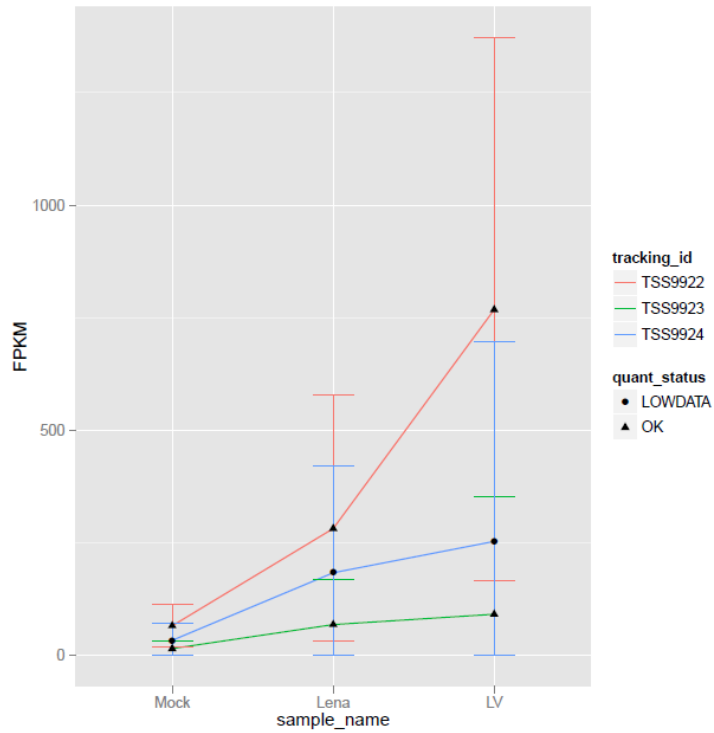

# IFIT1

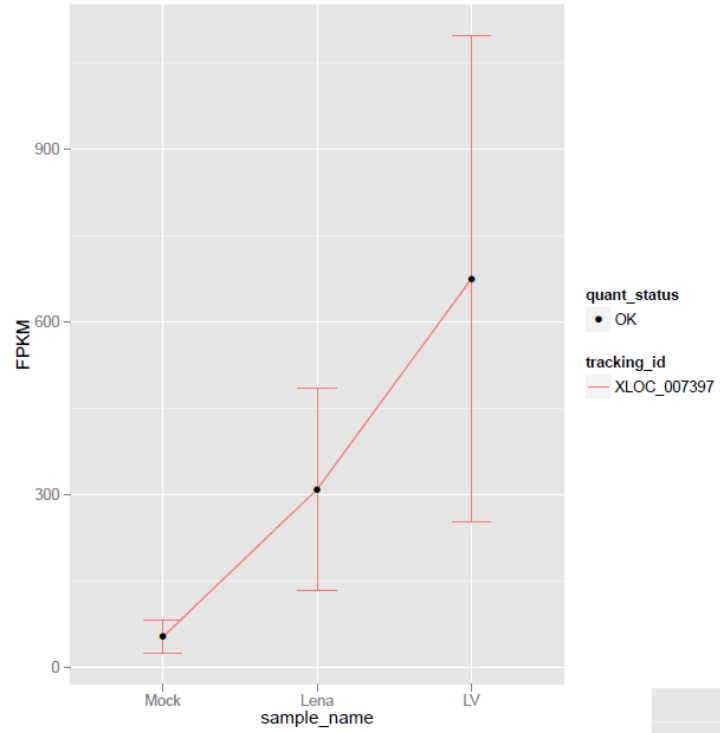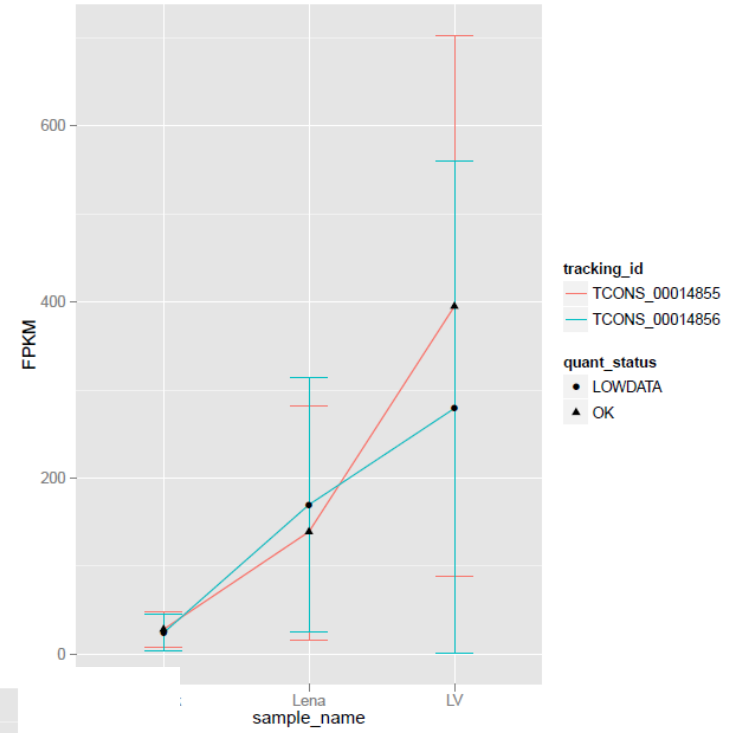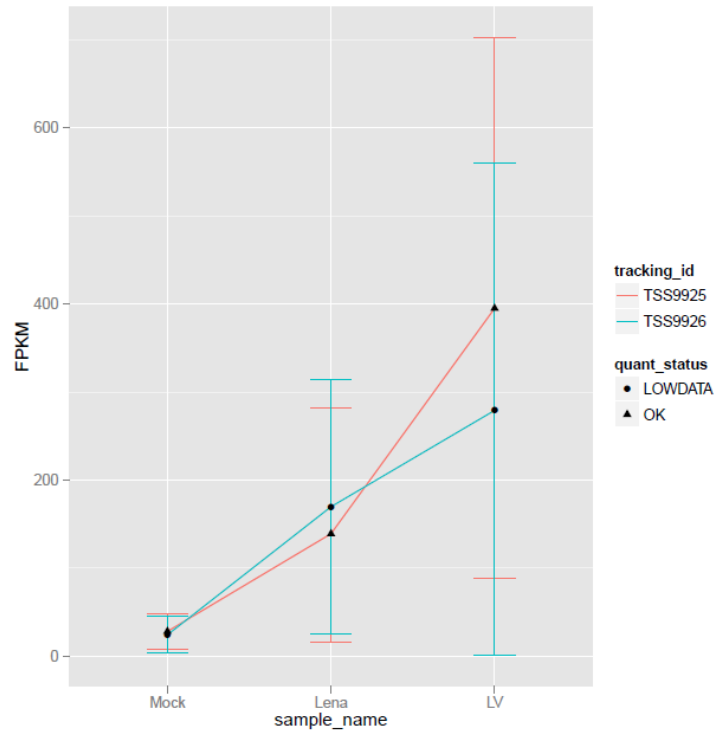



# OAS1

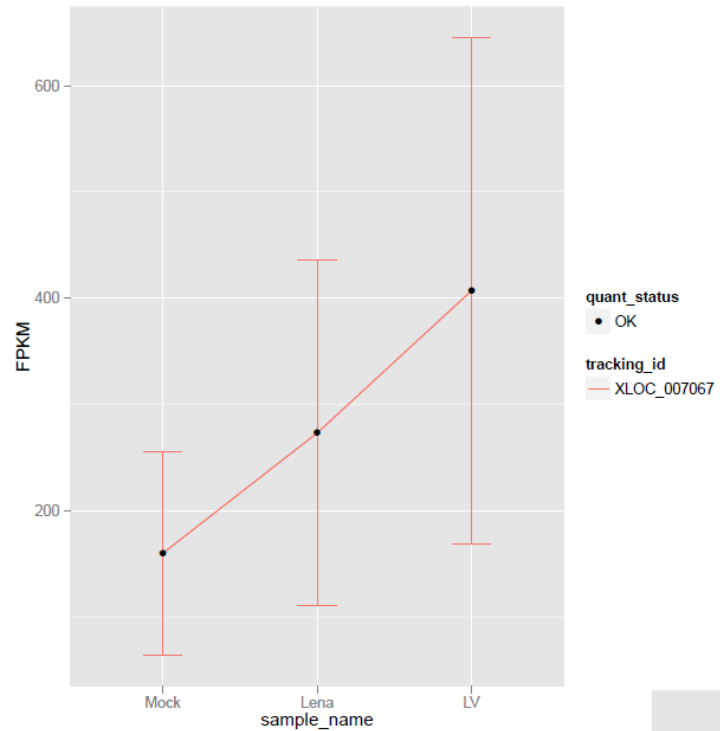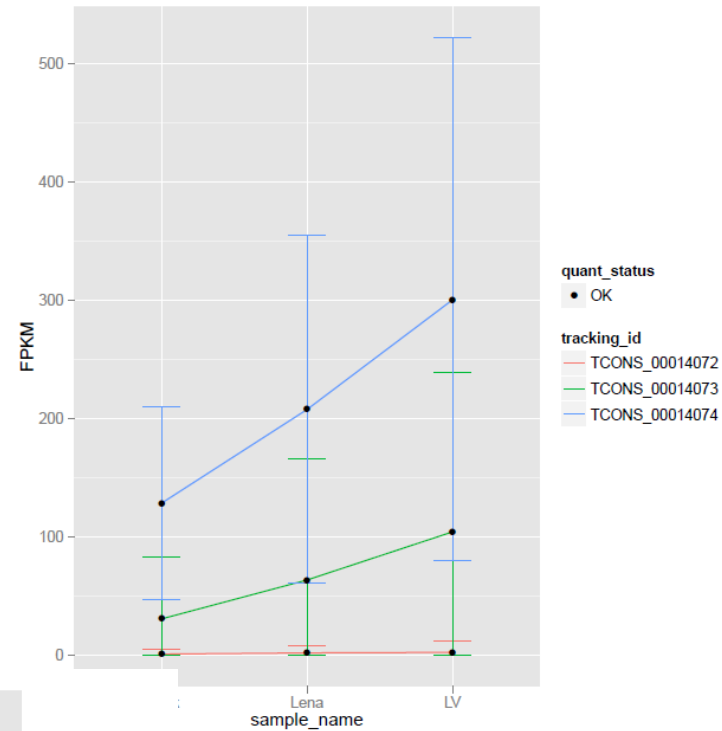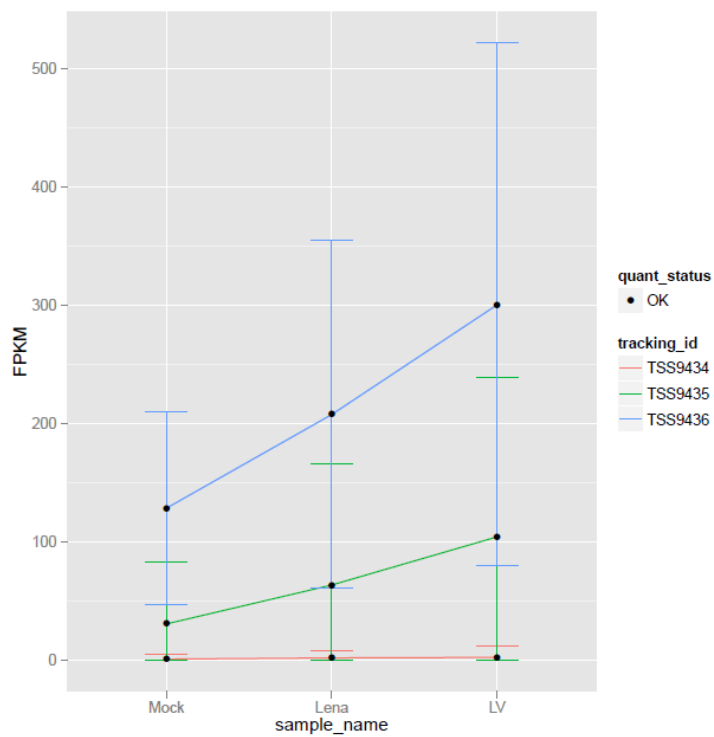

# MX1

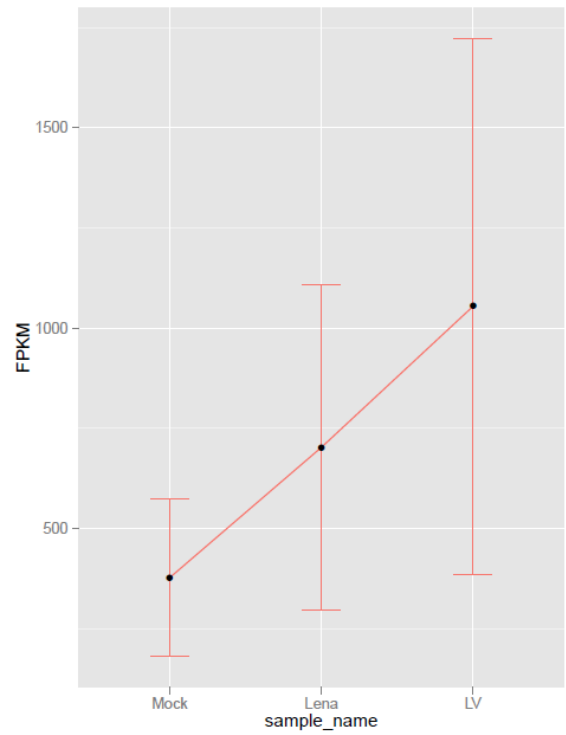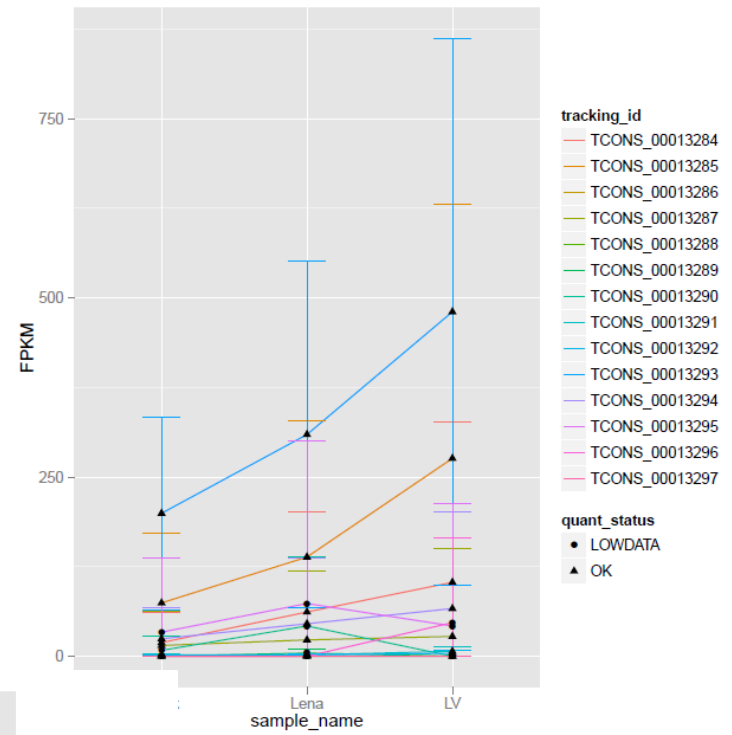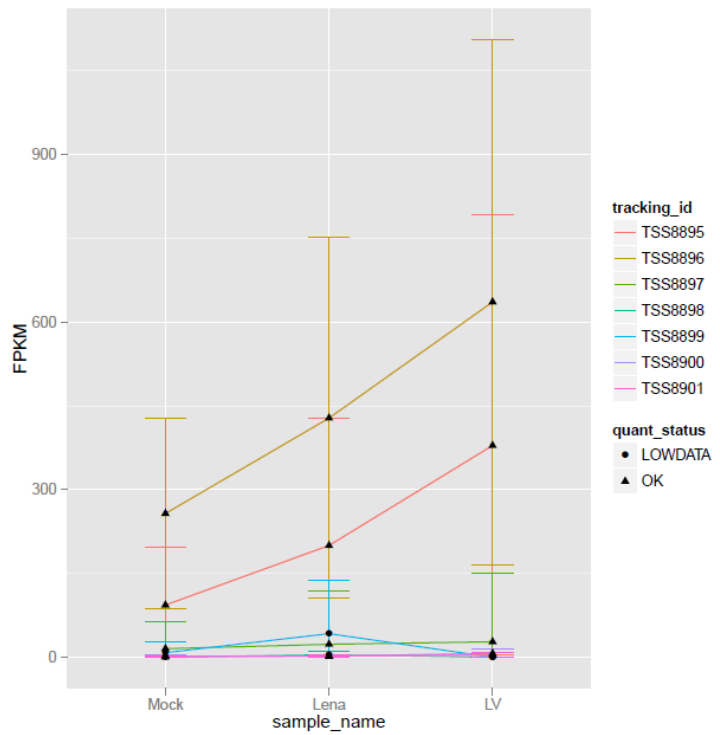

# IFNB1



# IFITM1

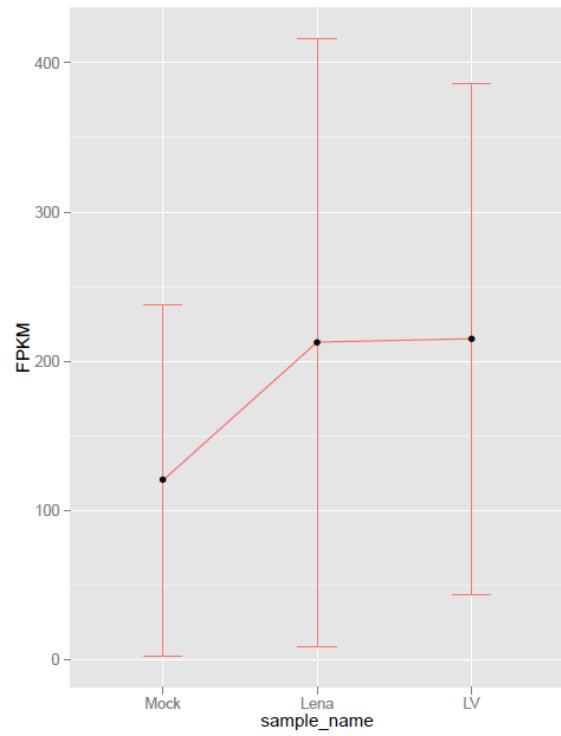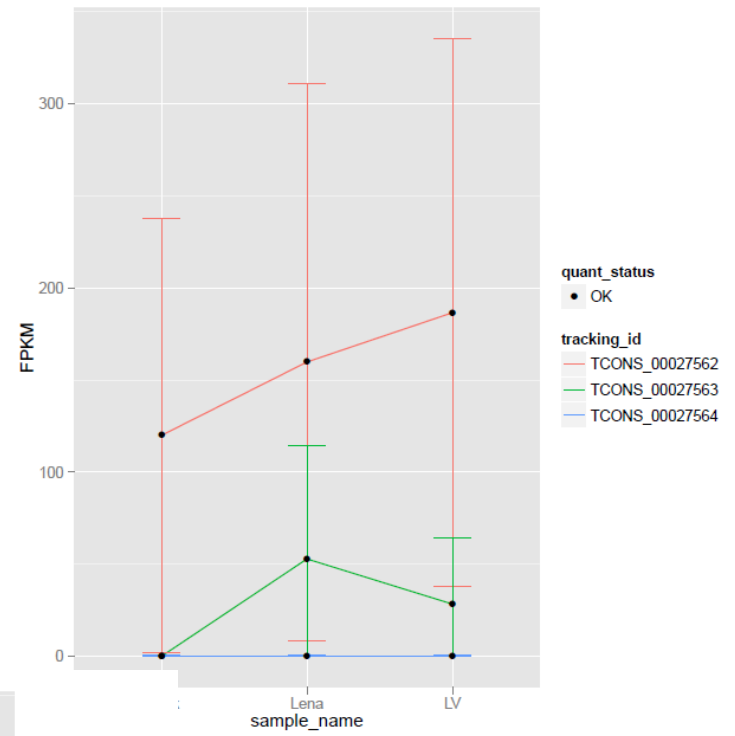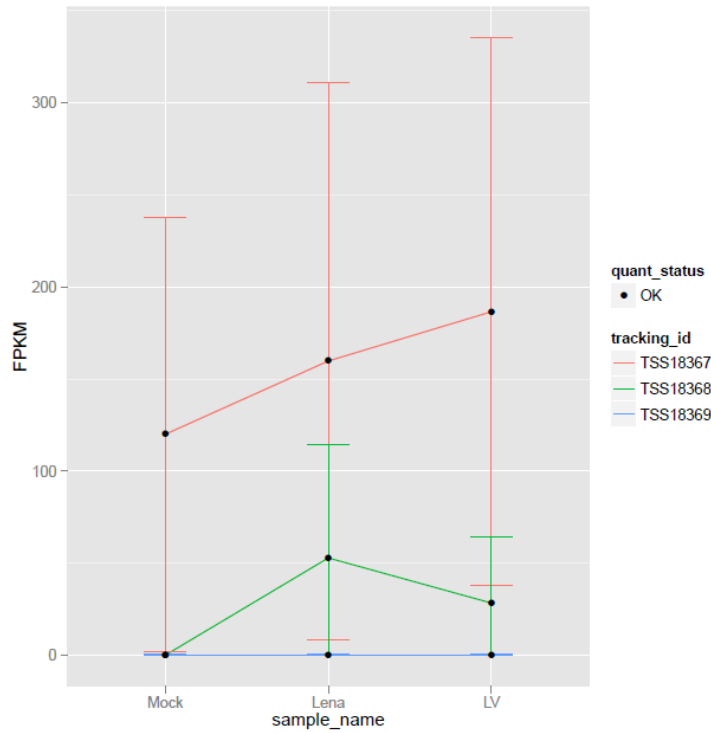

# PSMB8

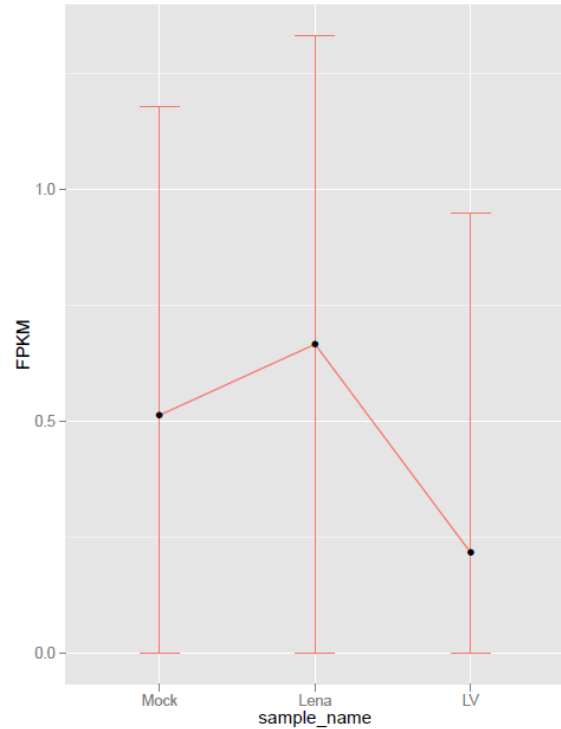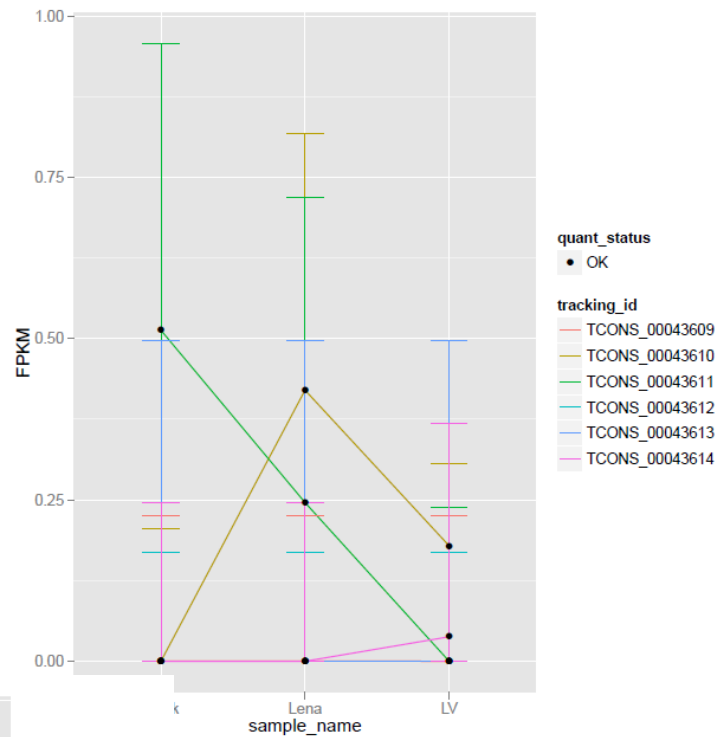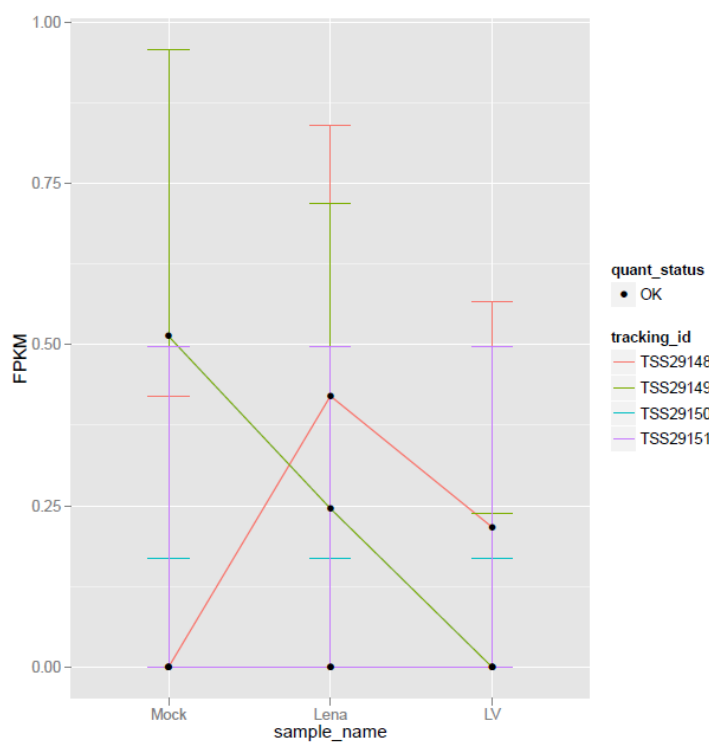

# JAK2

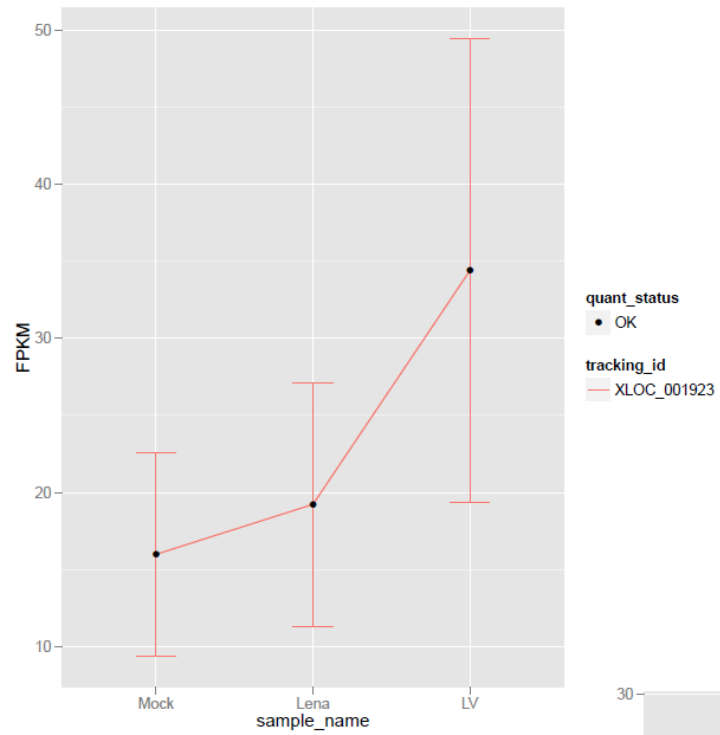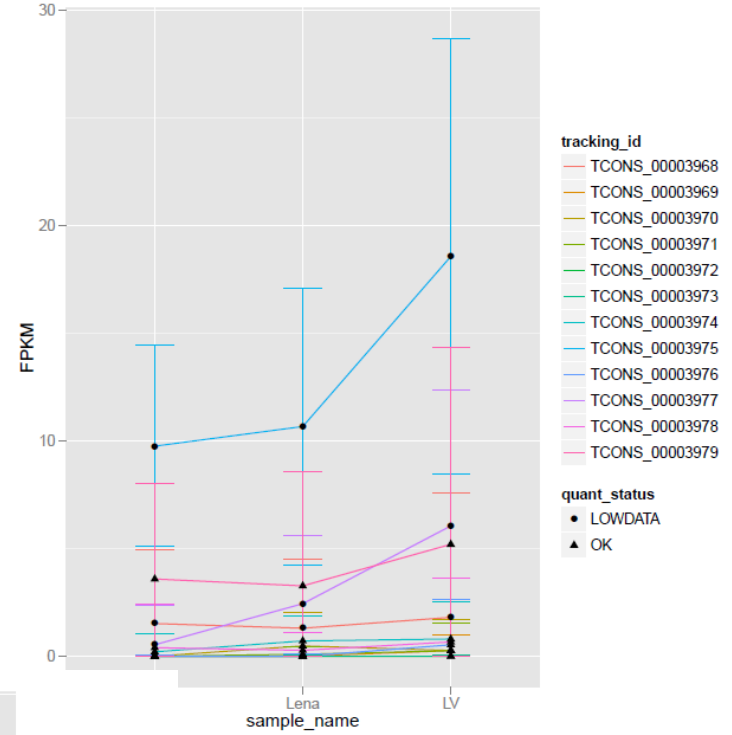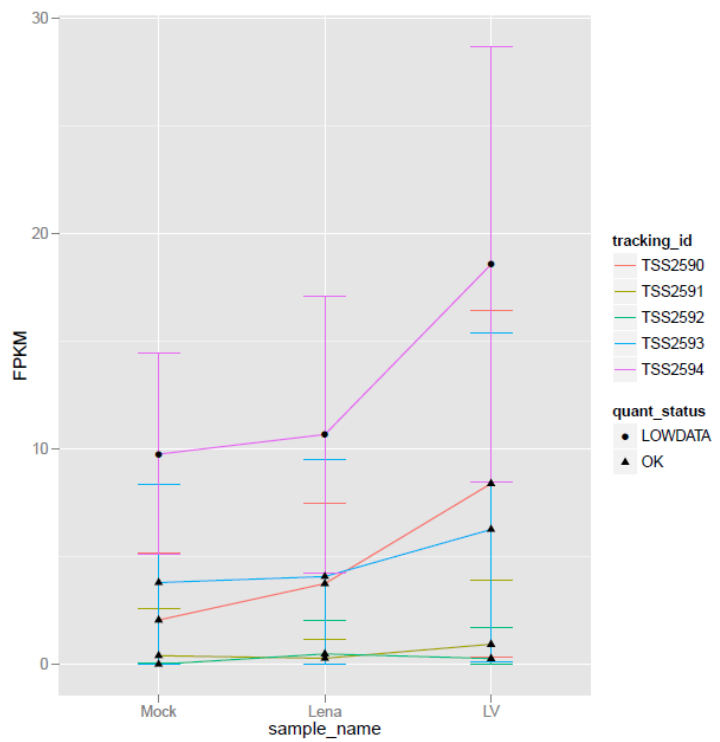

# IRF1

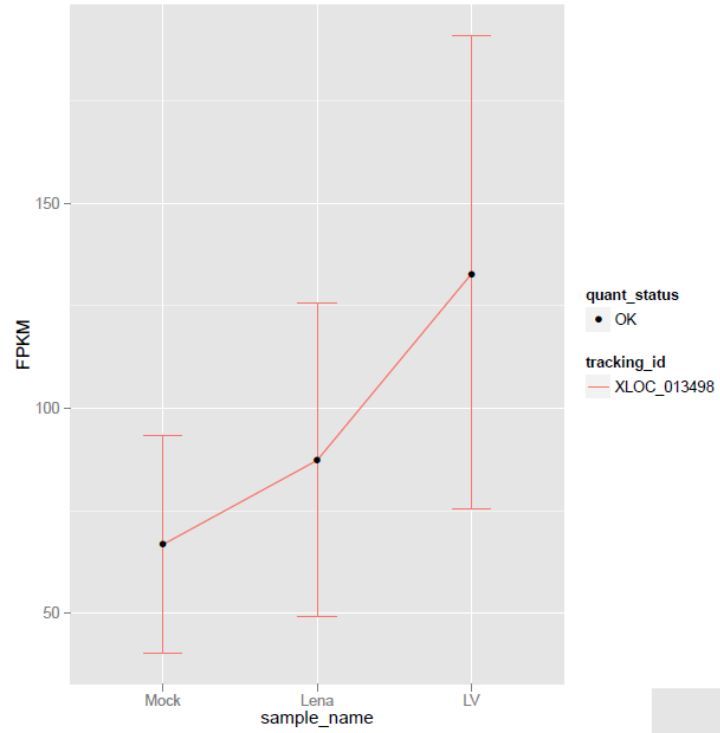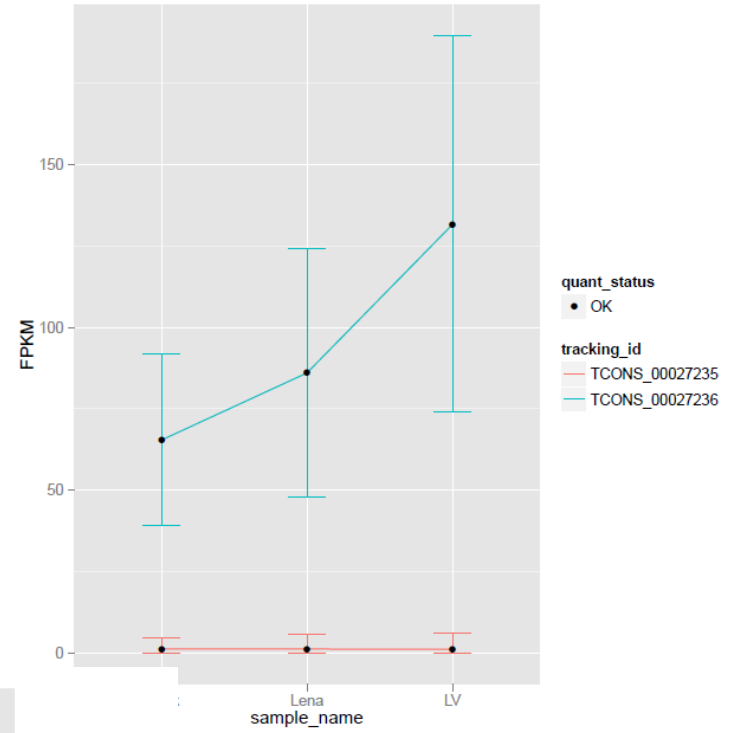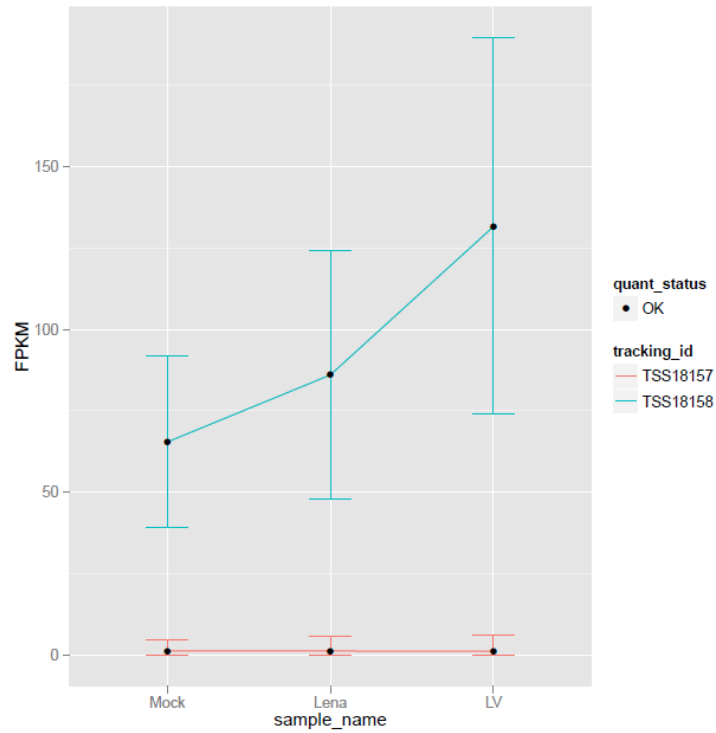

# DHX58

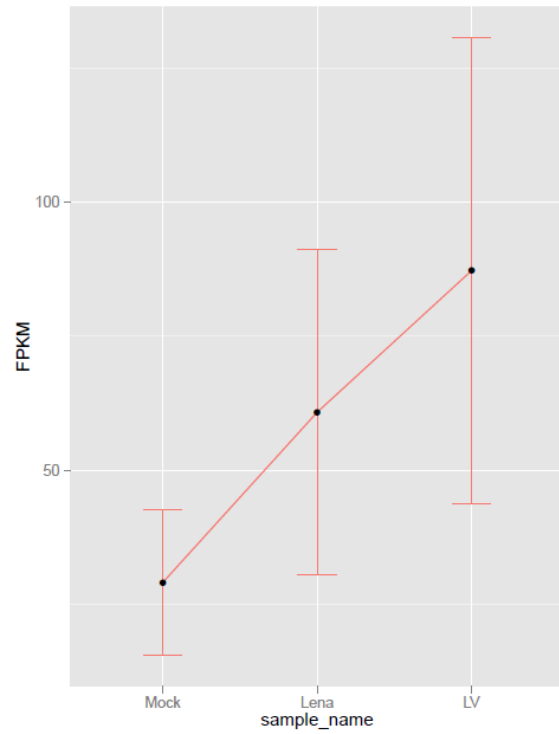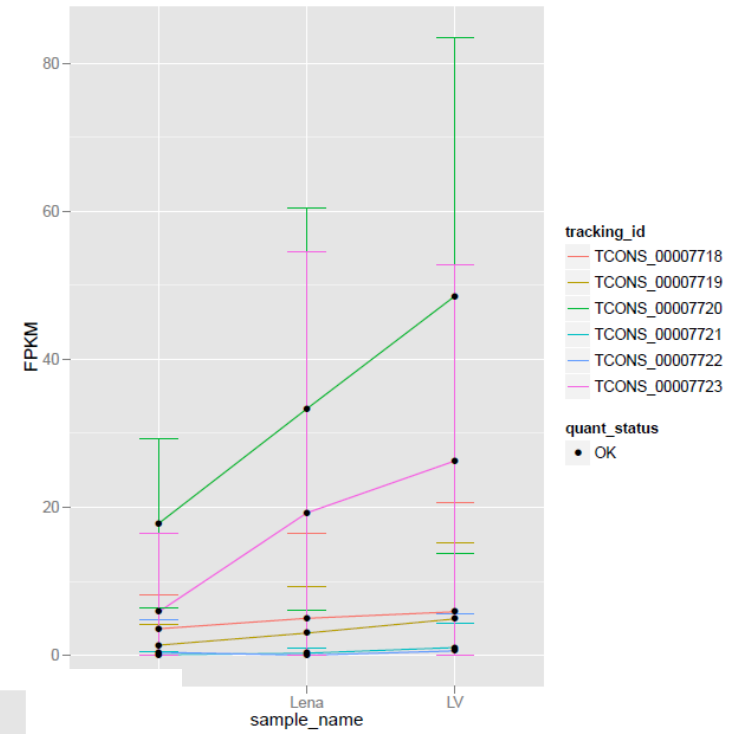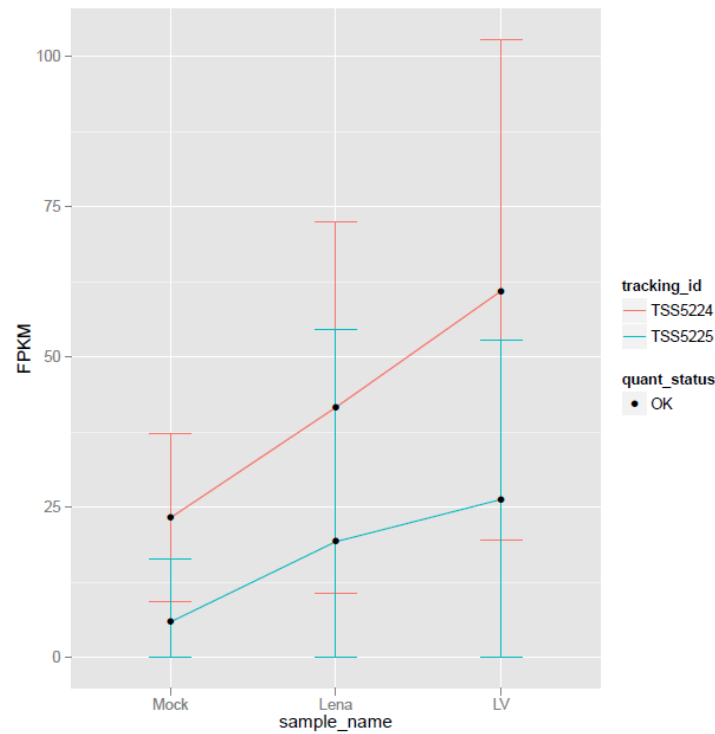



# IL10

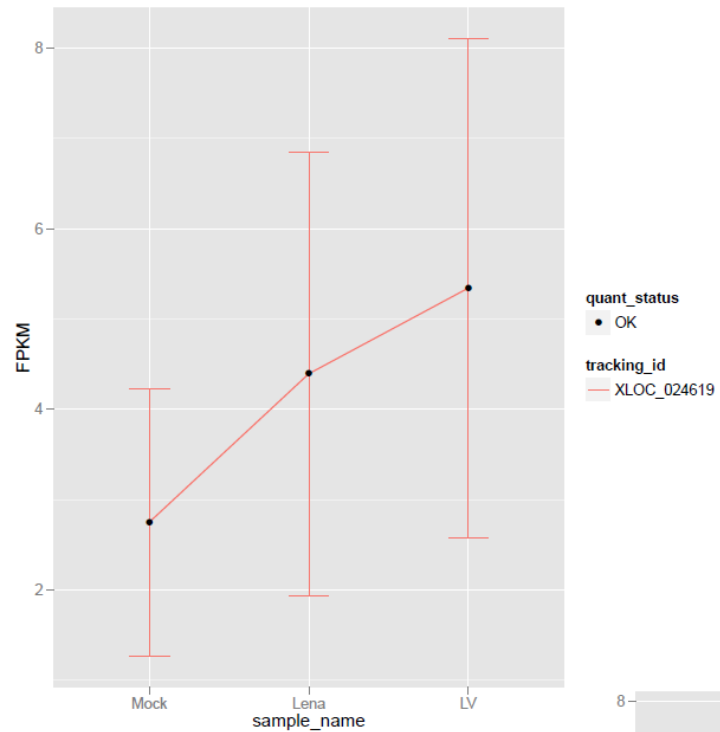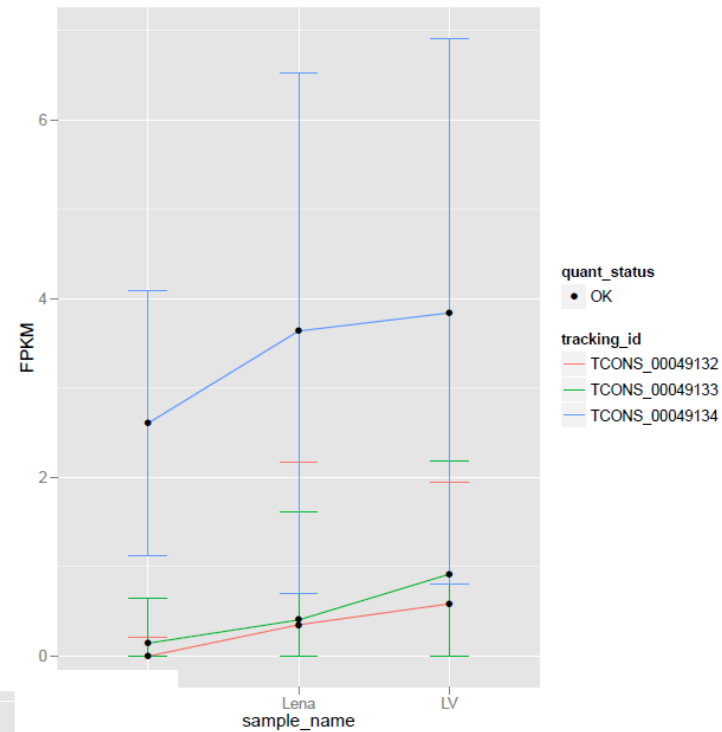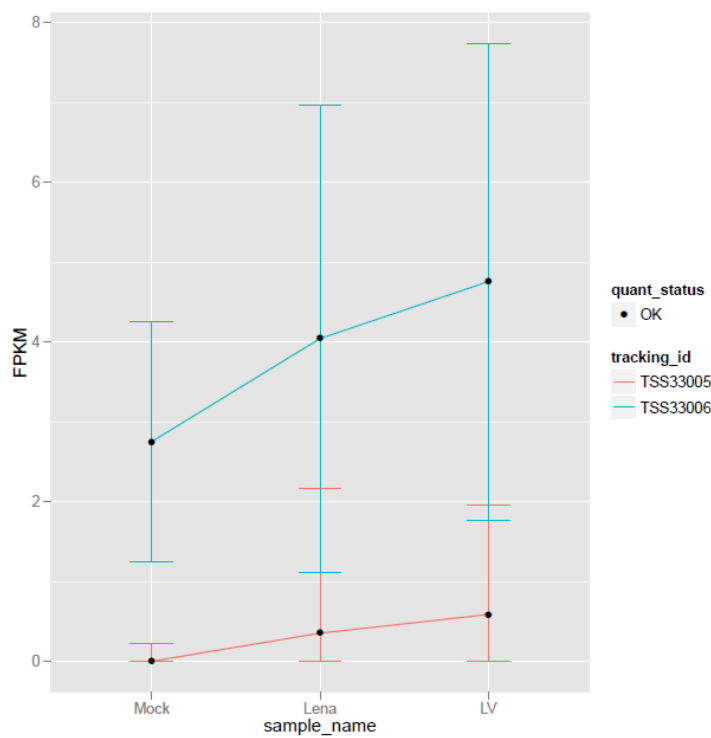

# ZBP1

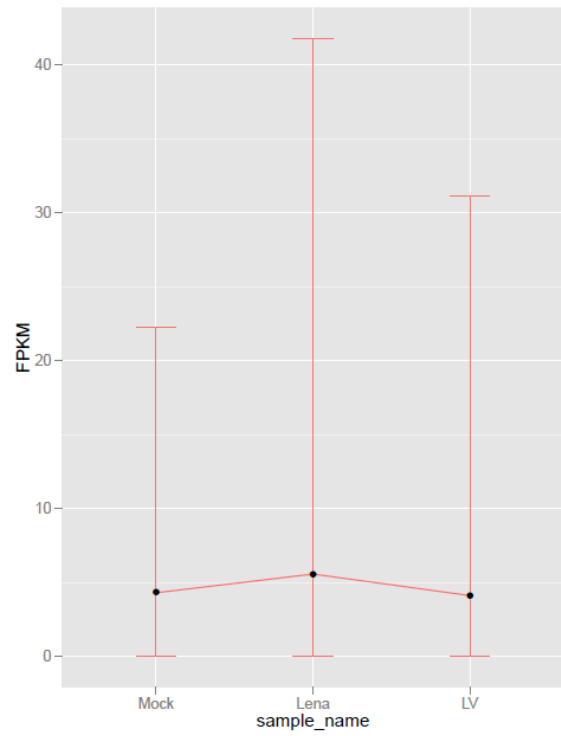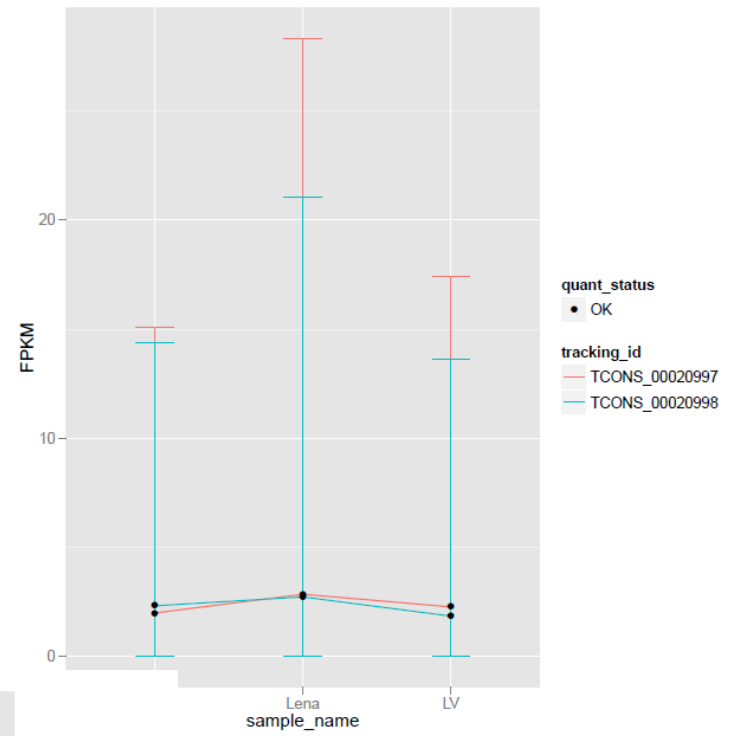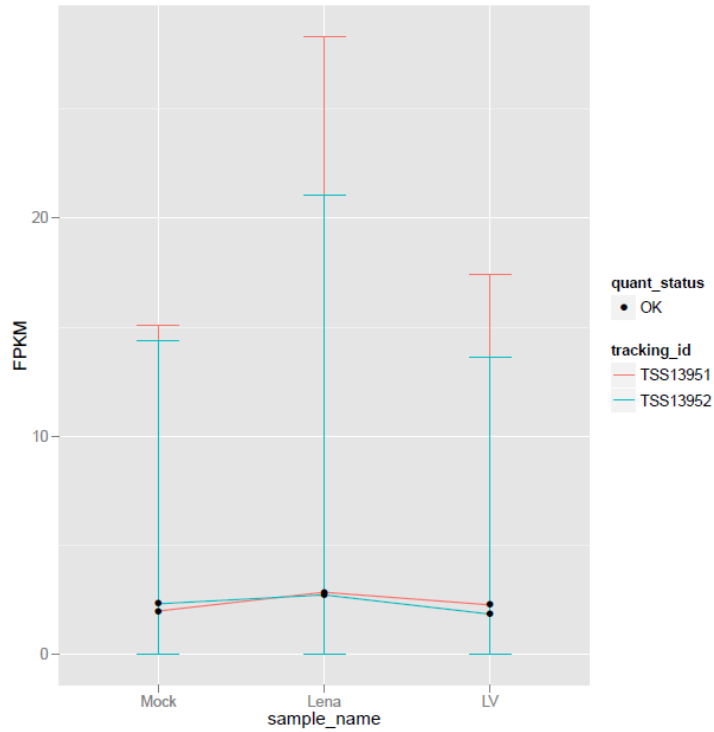

# ADAR

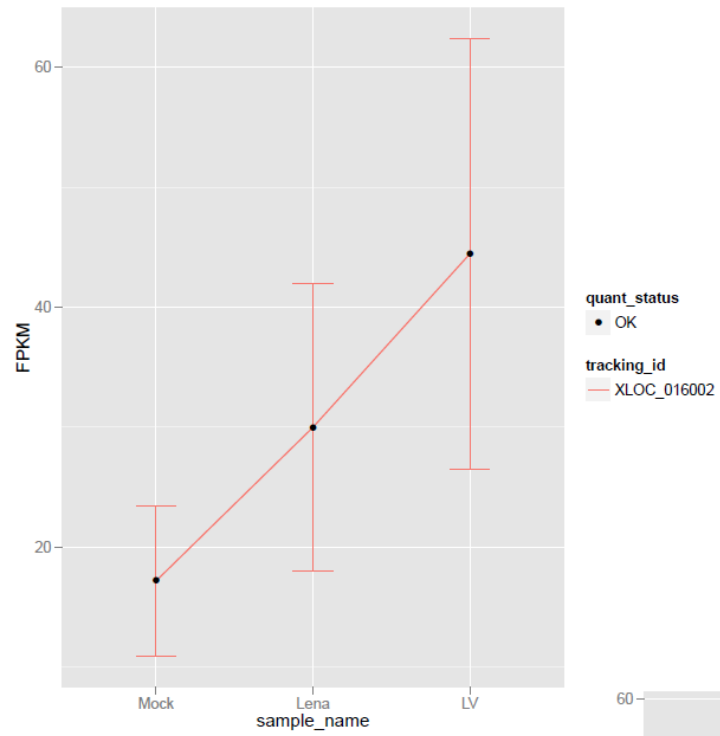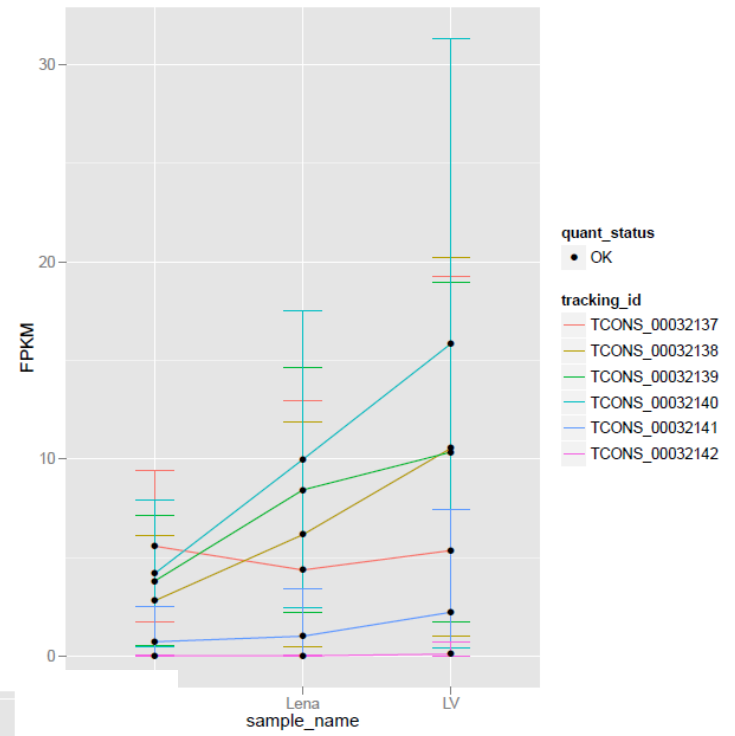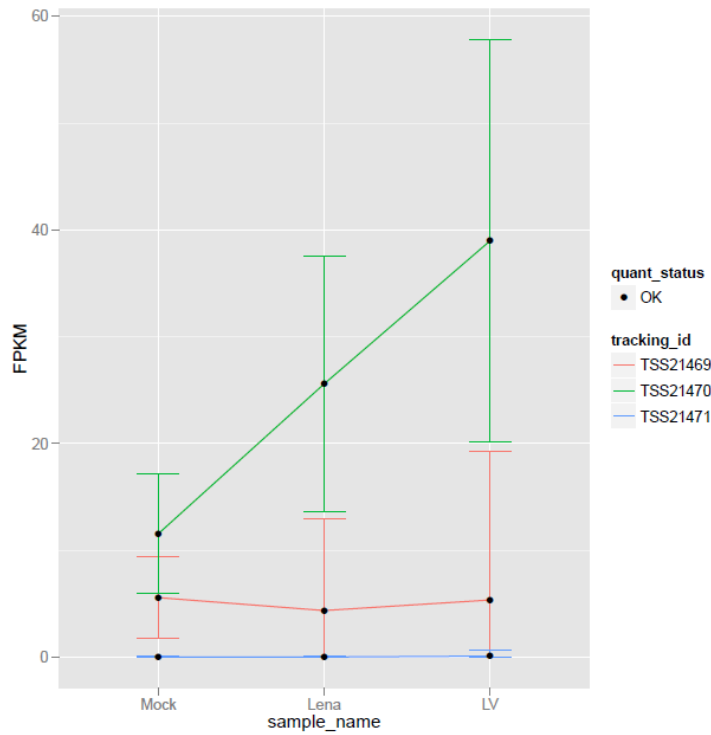

# ISG15

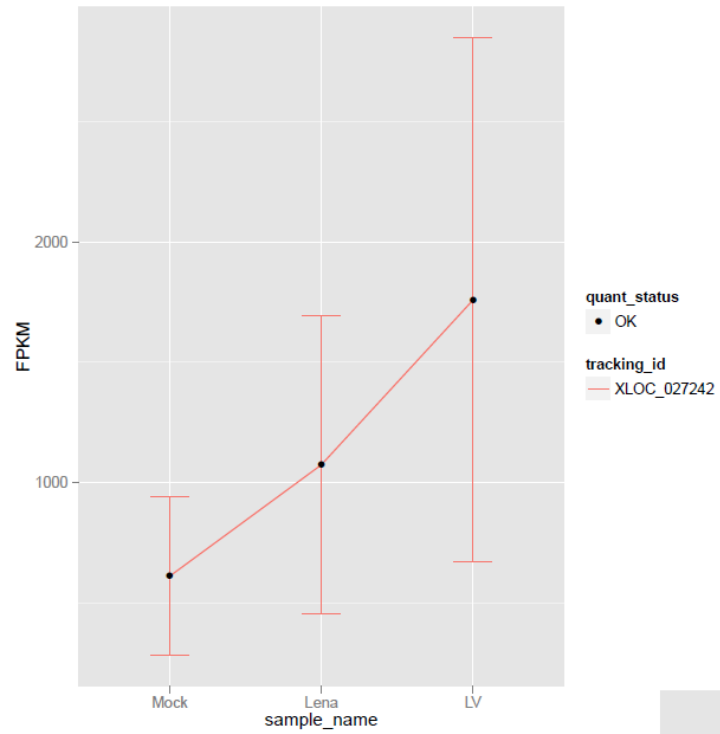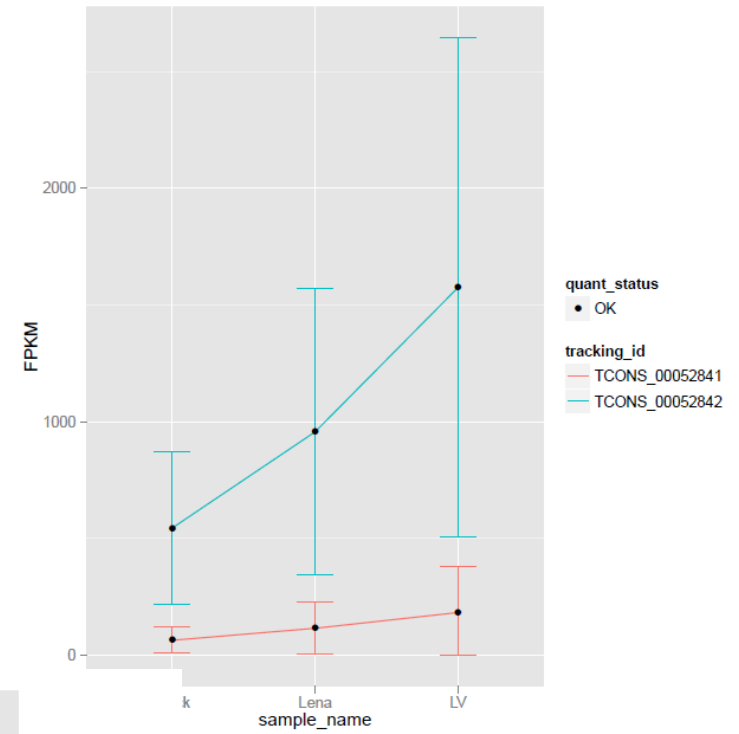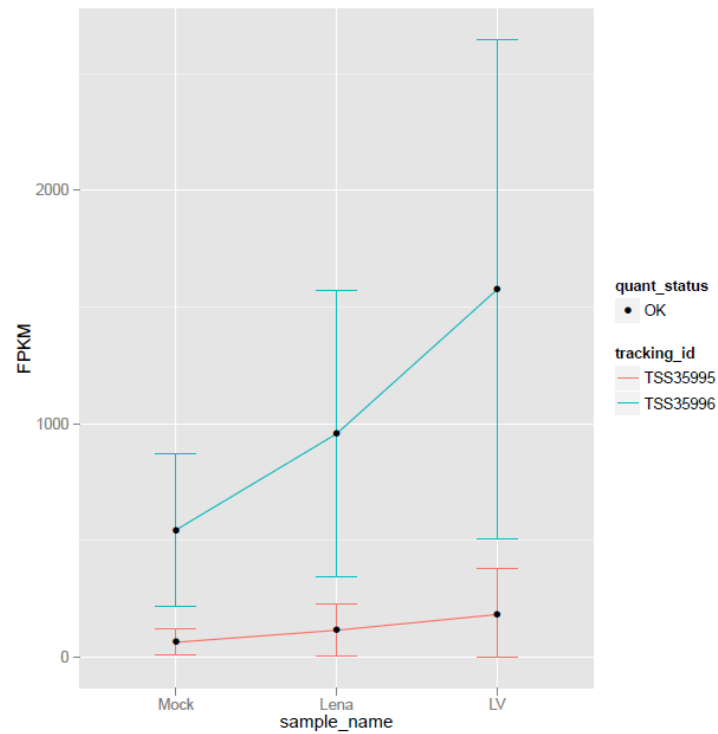

# IFIH1

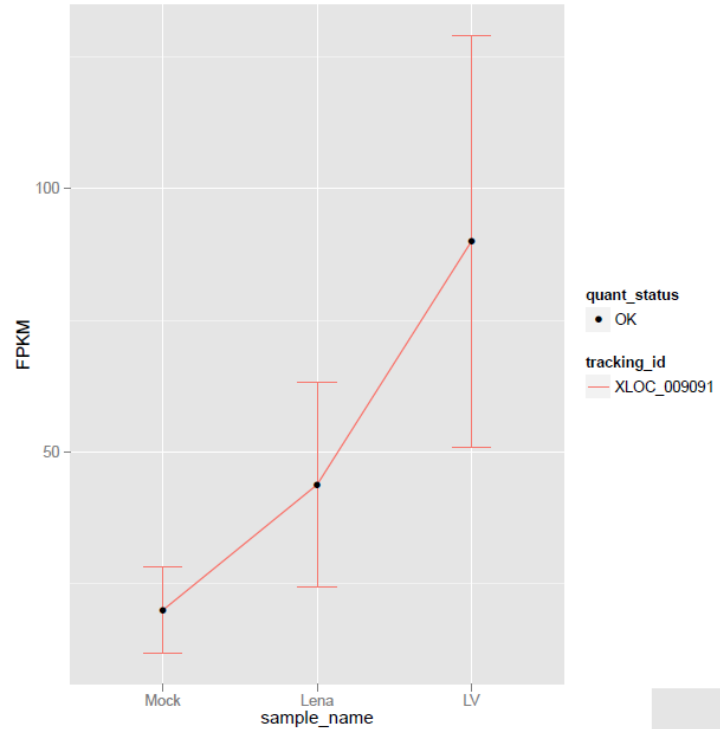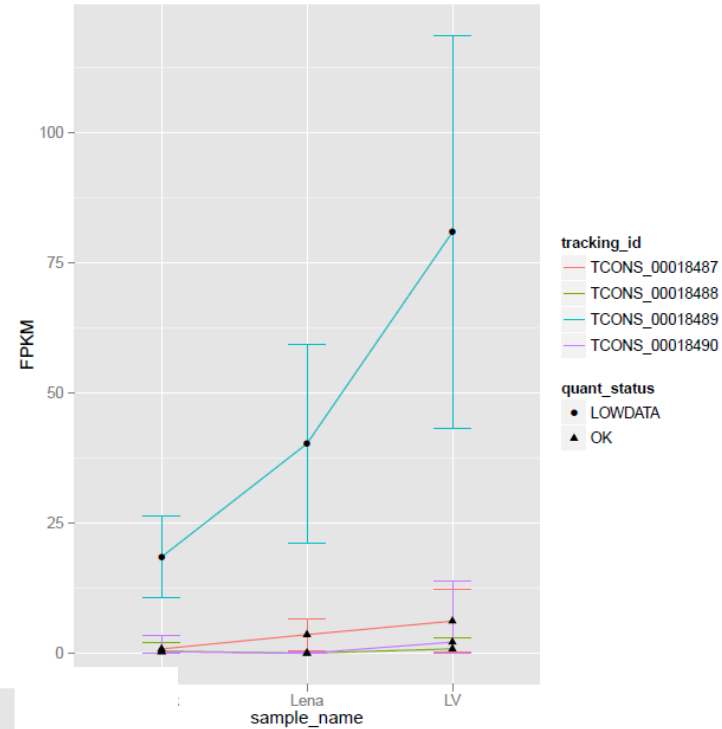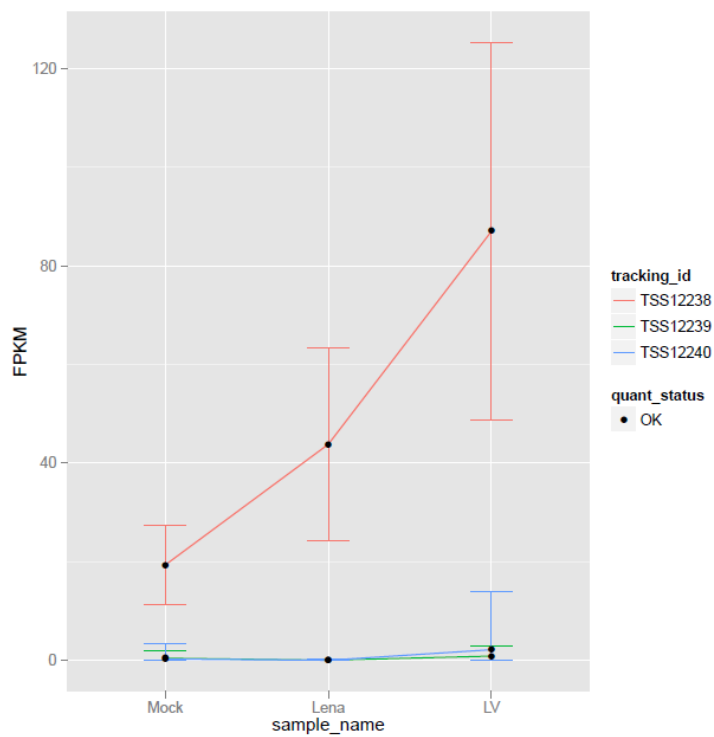

# NFKBIA

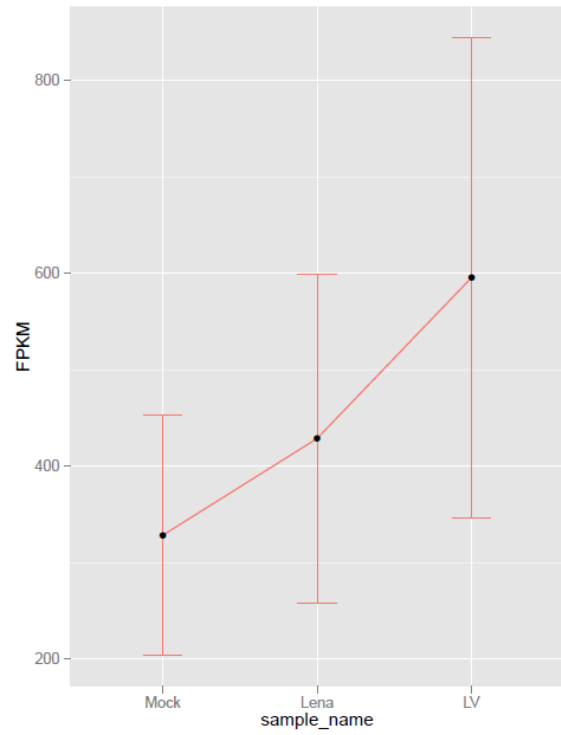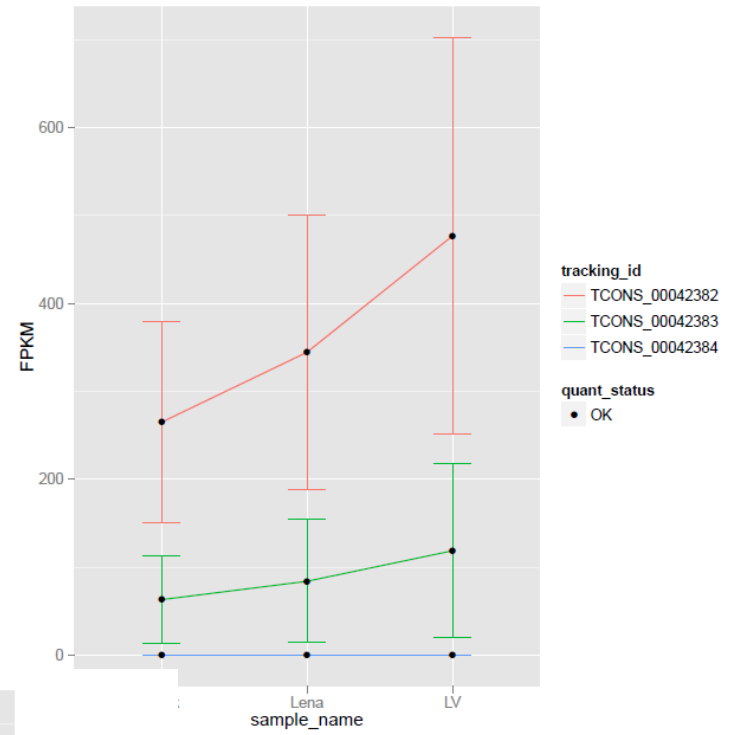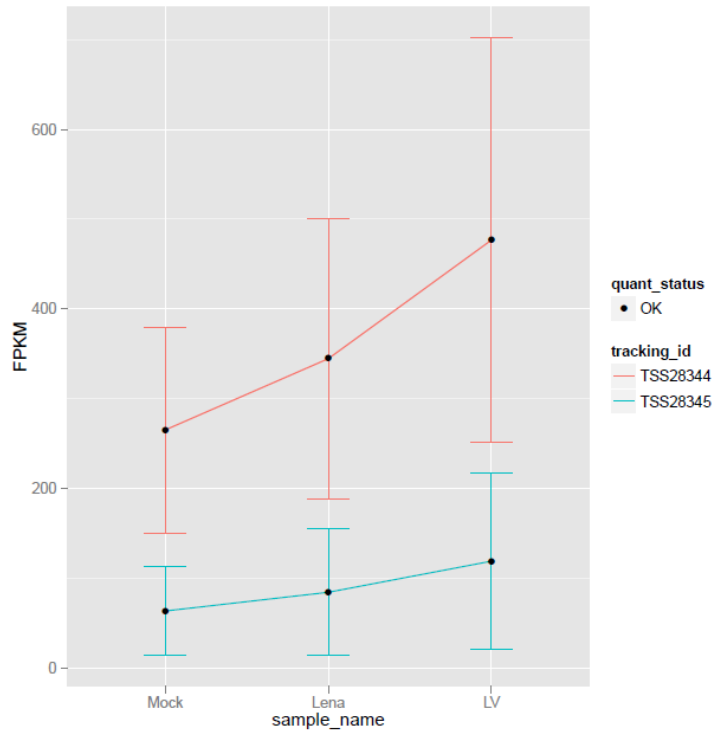

# IFIT2

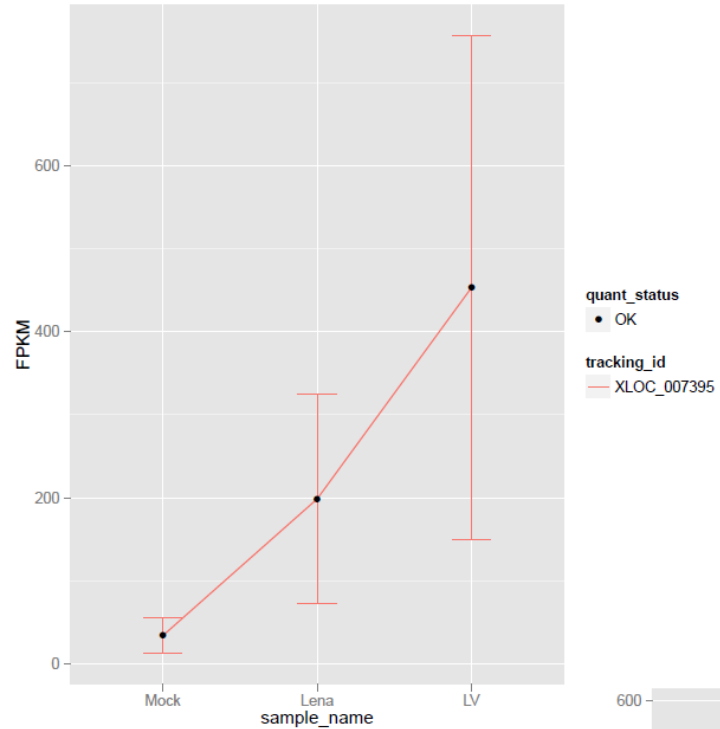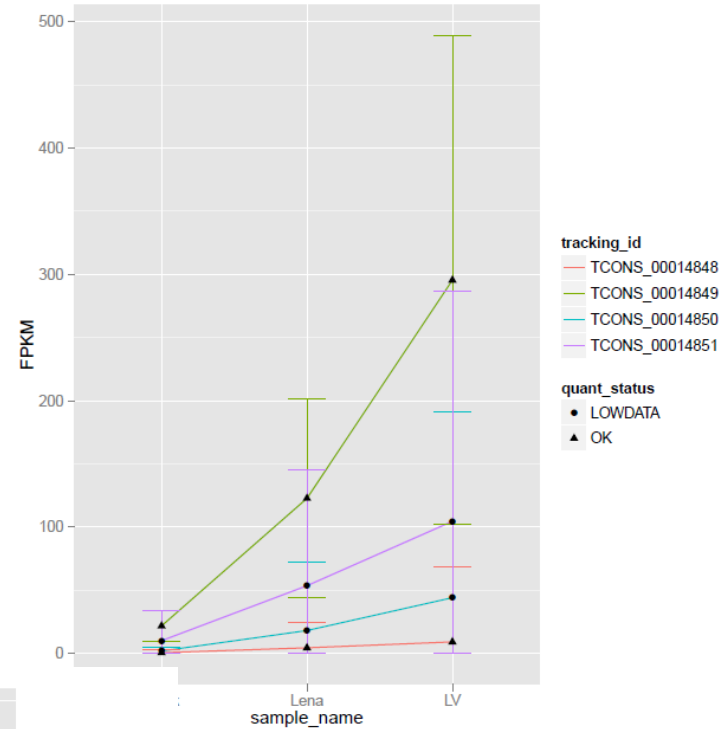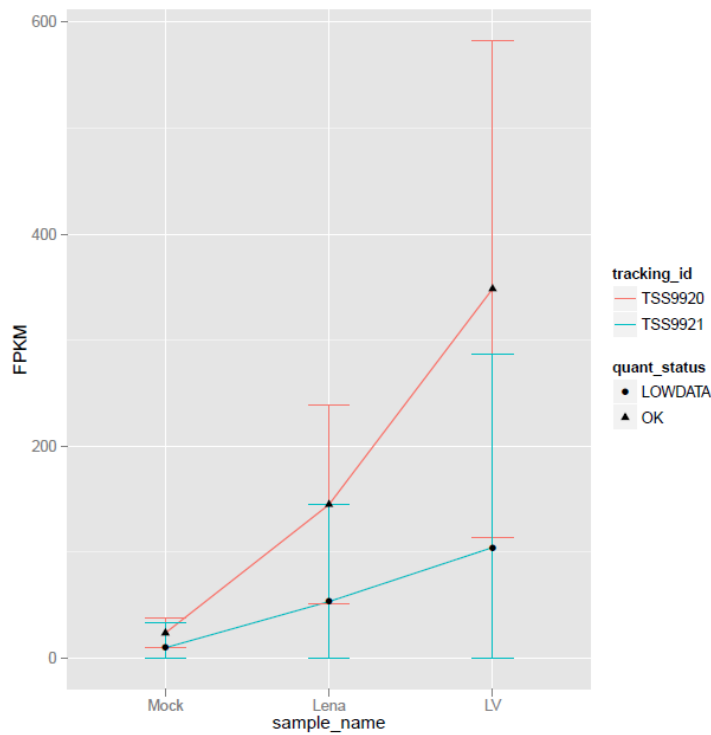

# PIK3R1

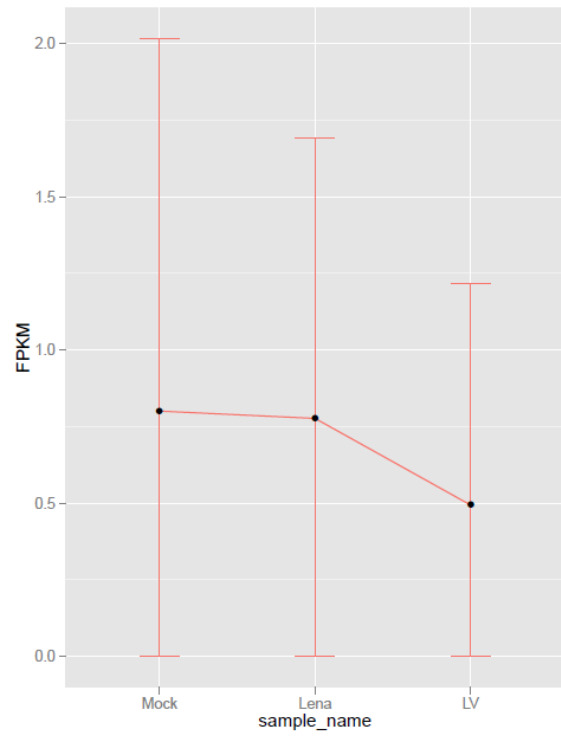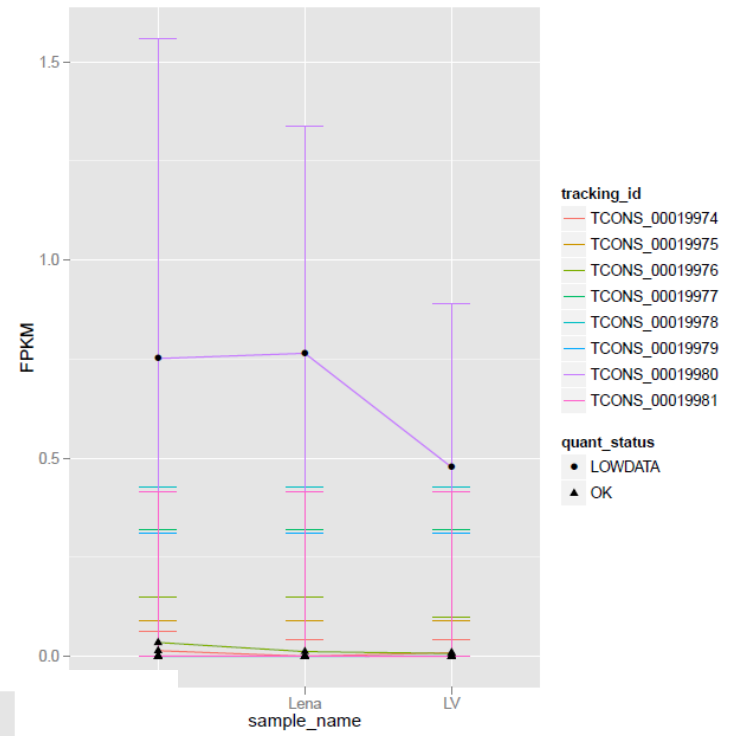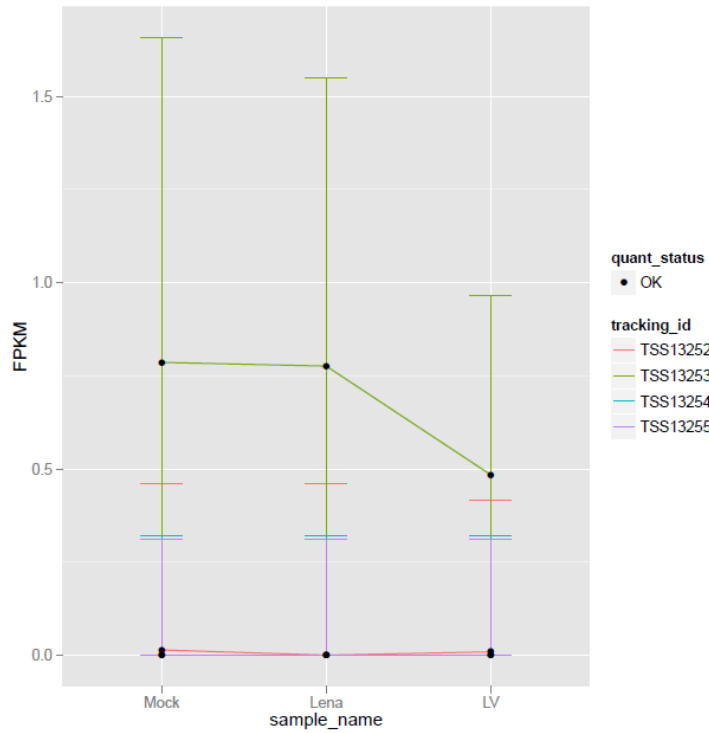



# RNASEL

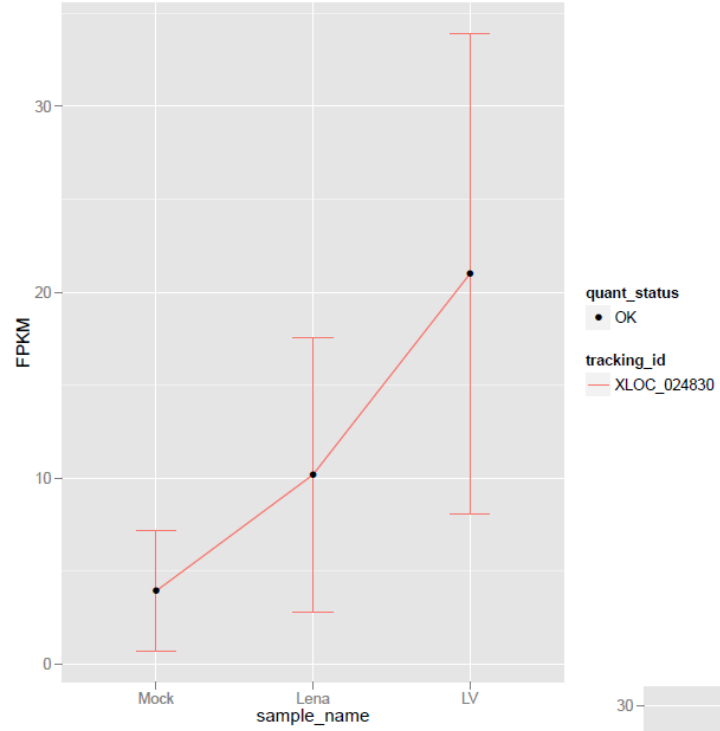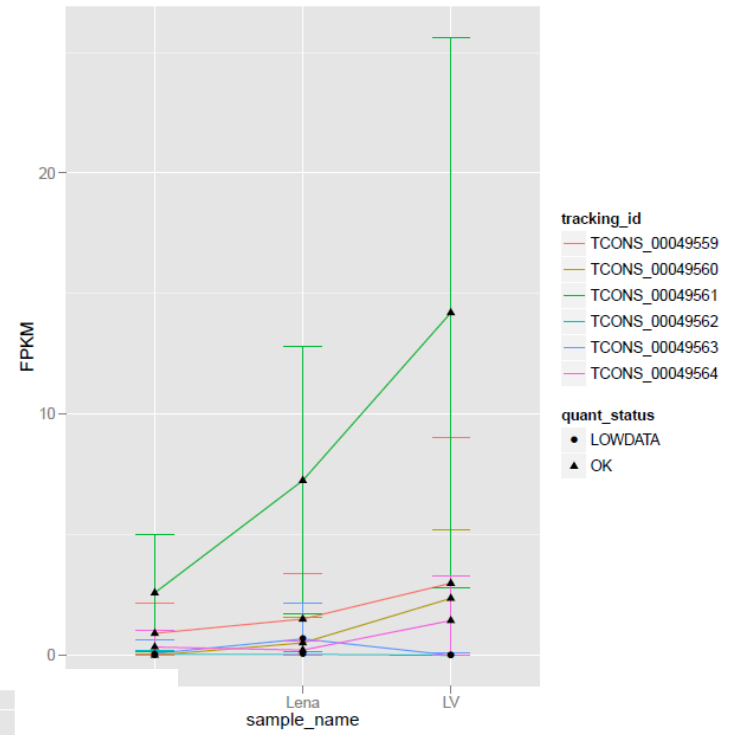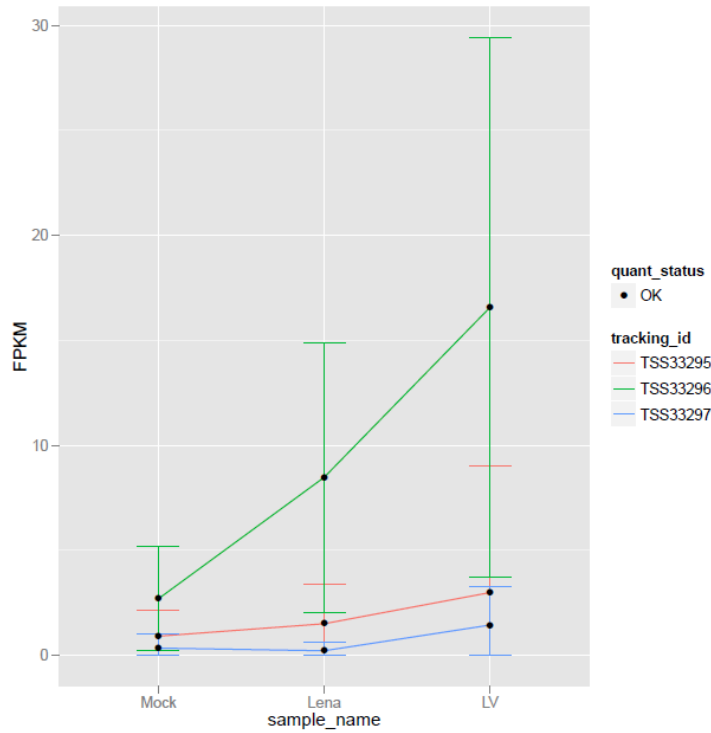

# TLR7

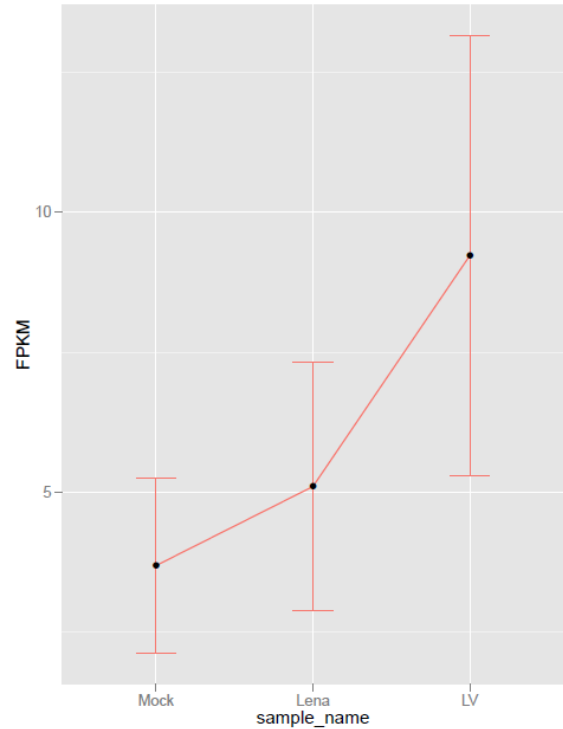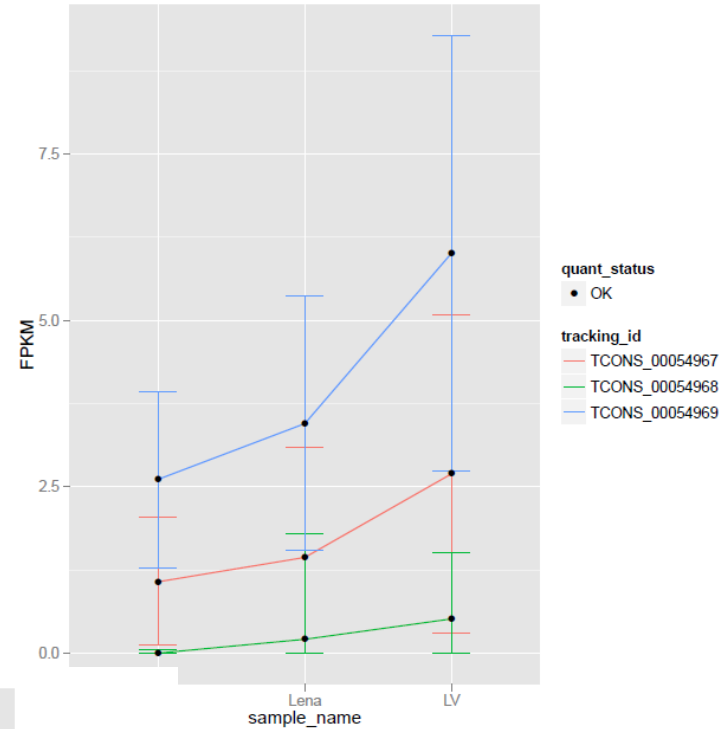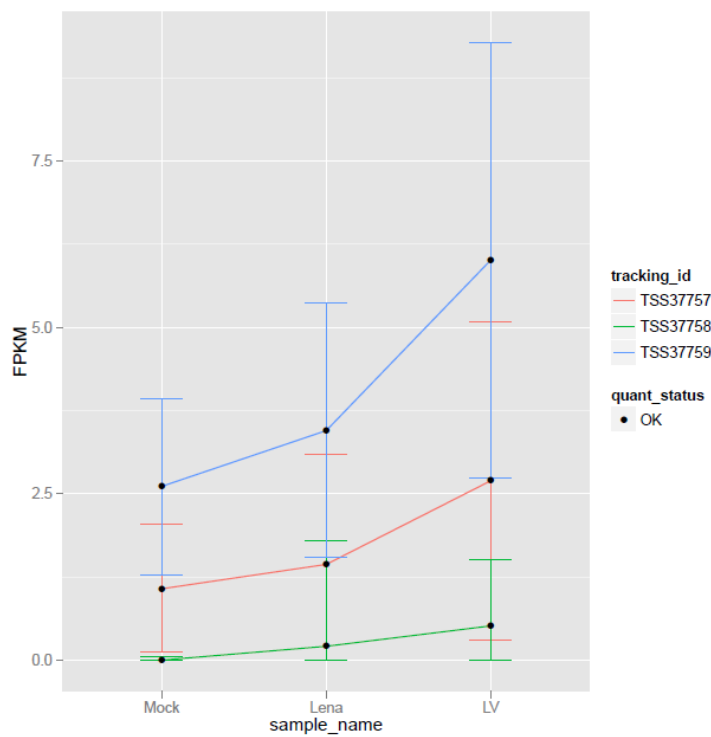

# PIK3CD

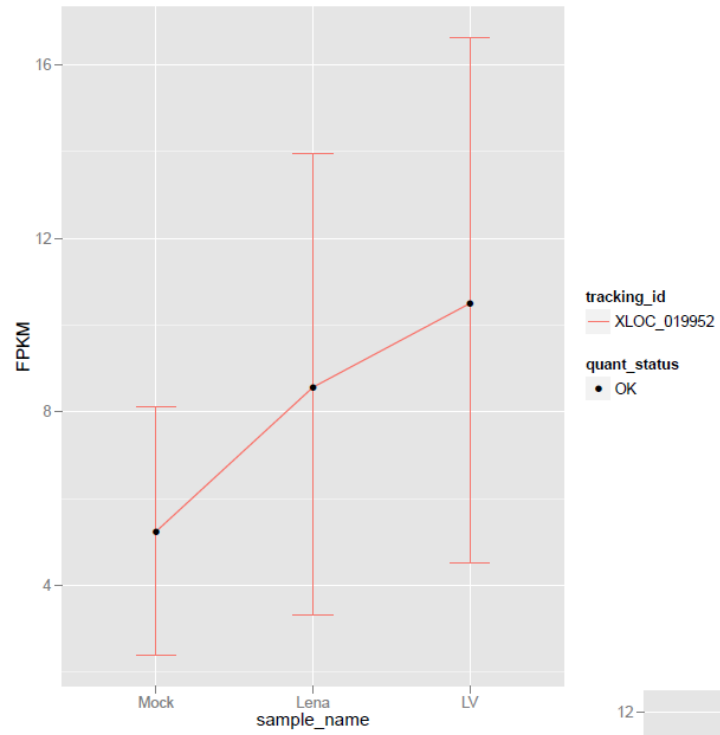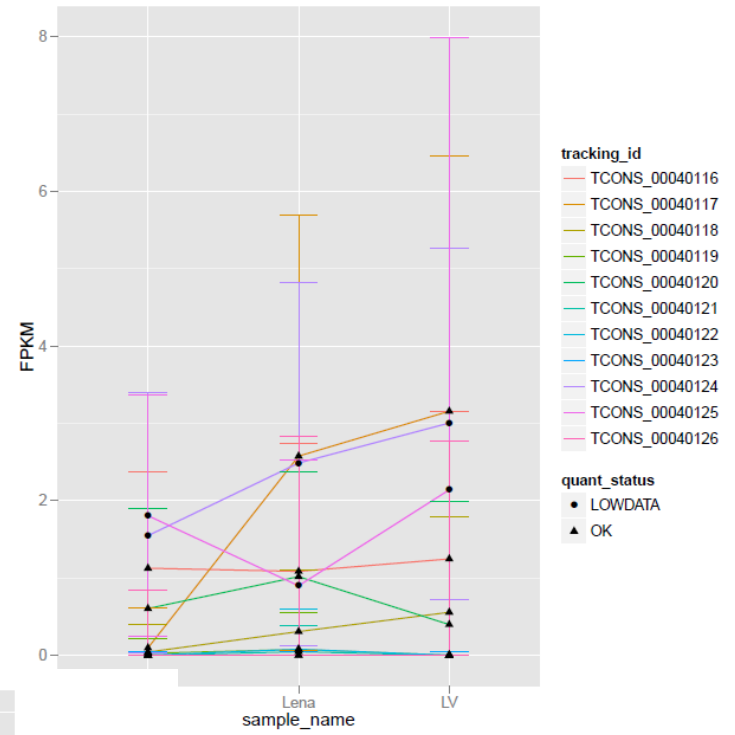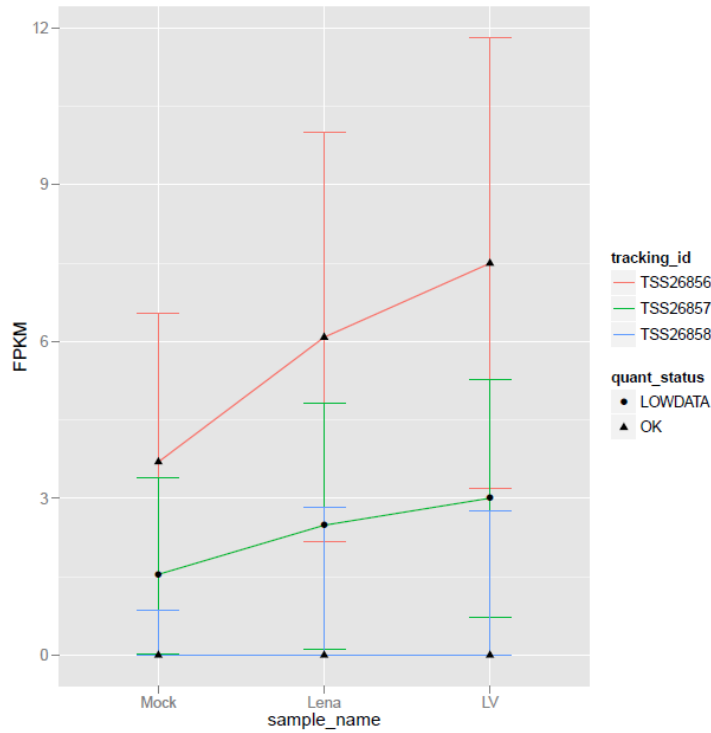

# EIF2AK2

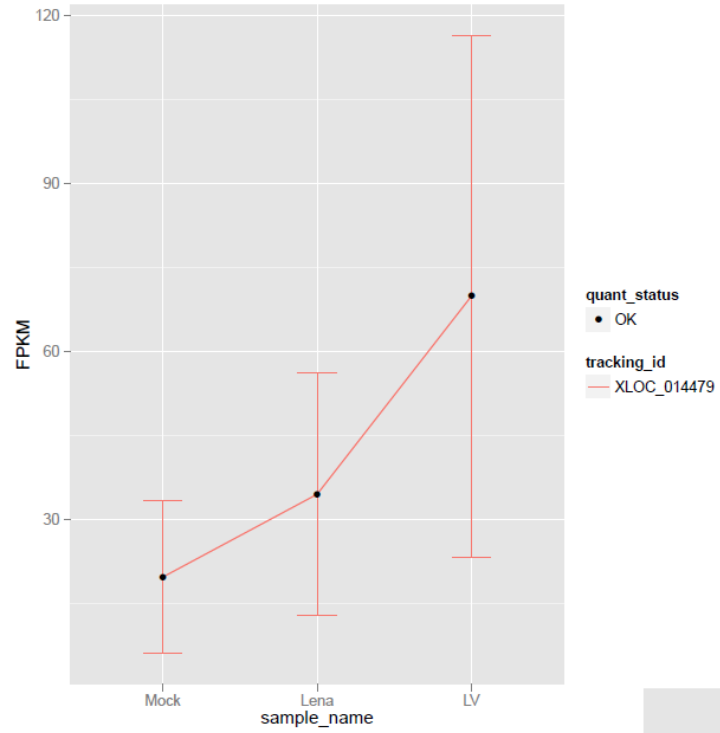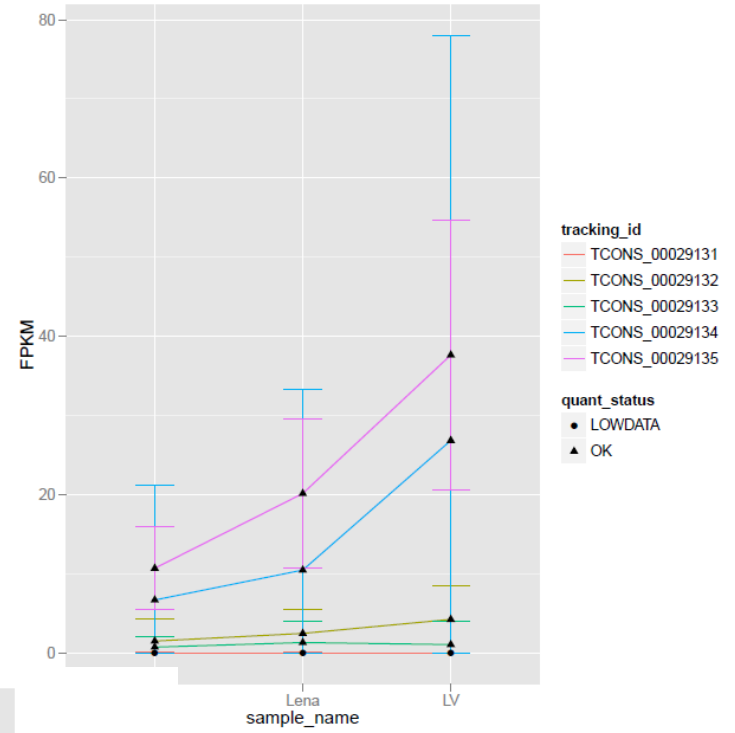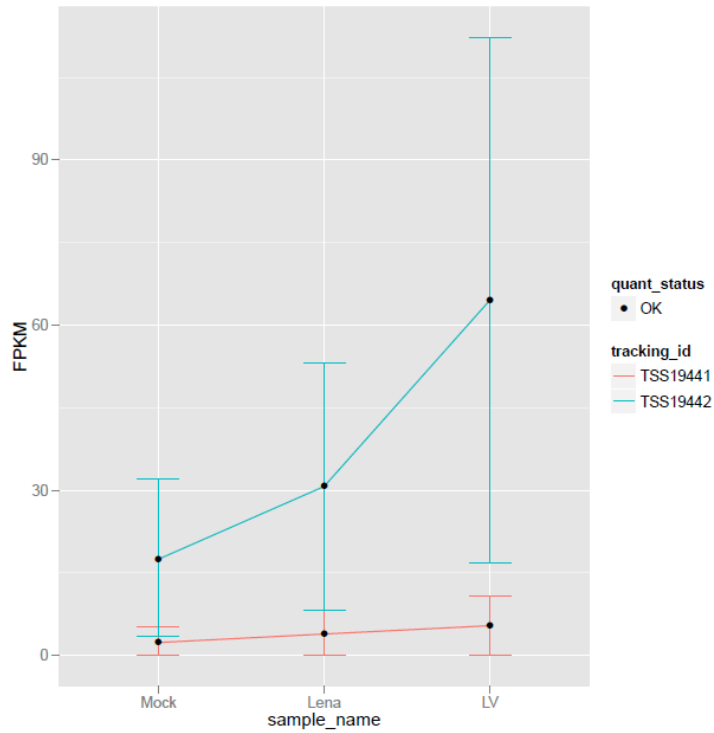

# TLR3

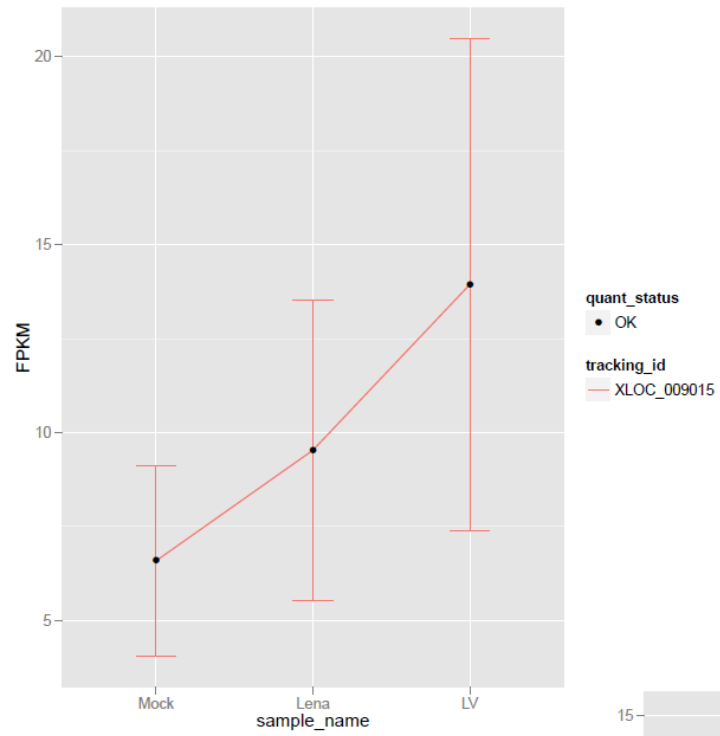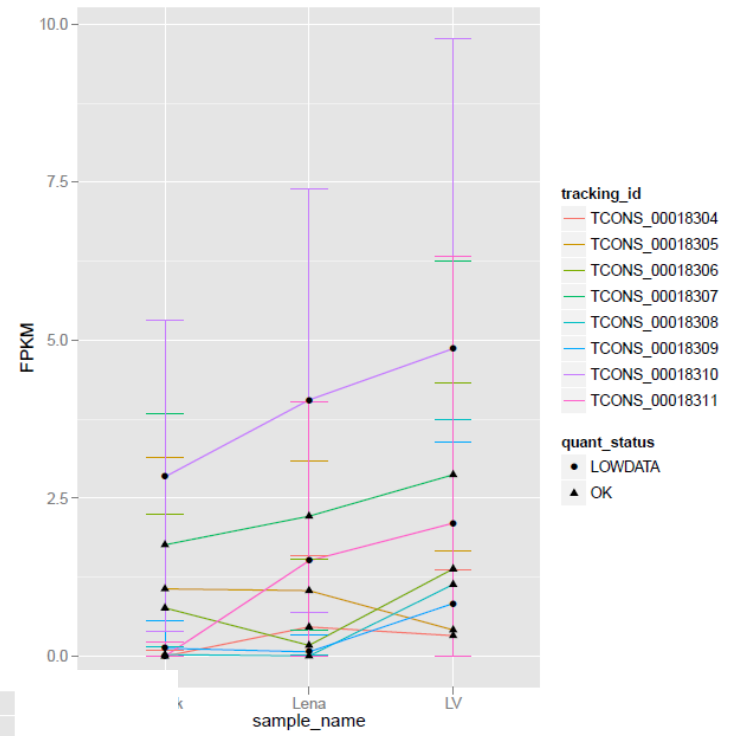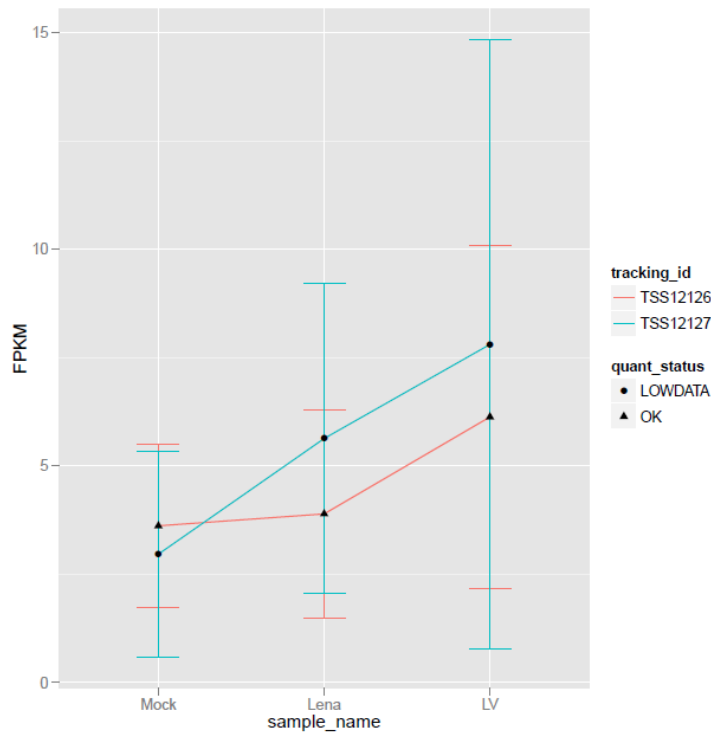

# TNFSF10

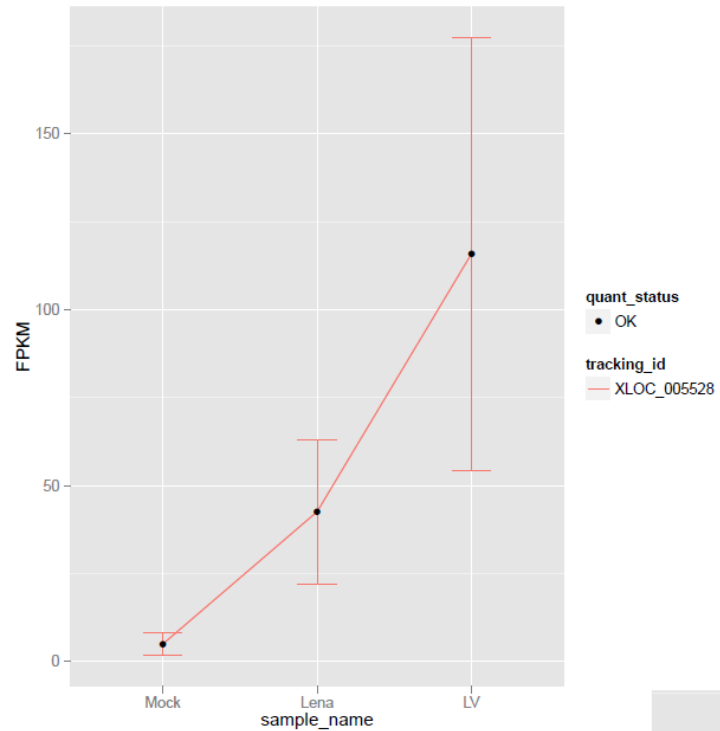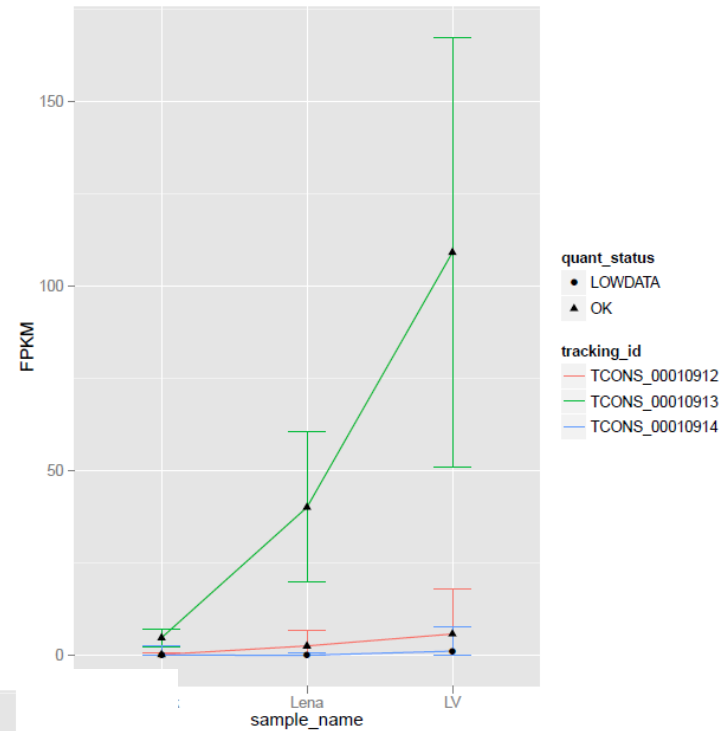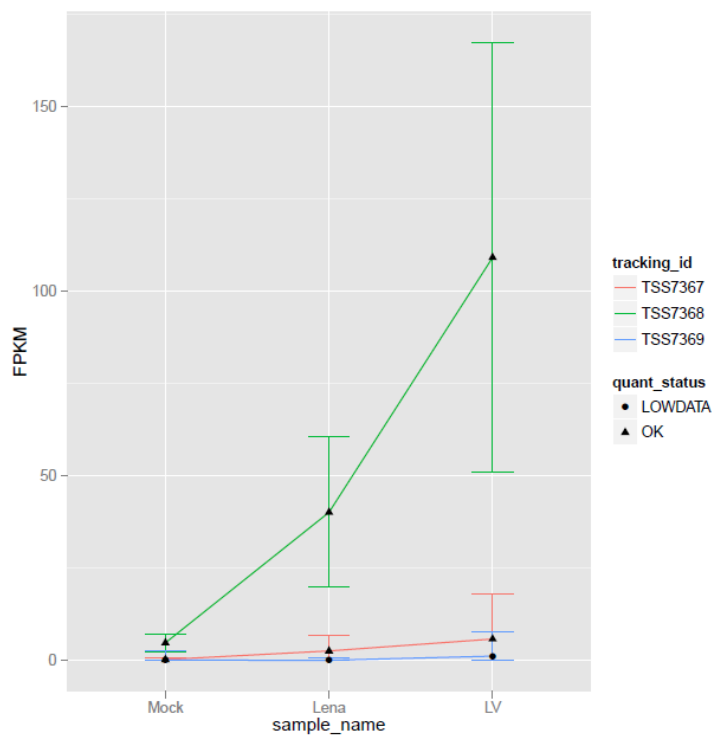

# PARP11

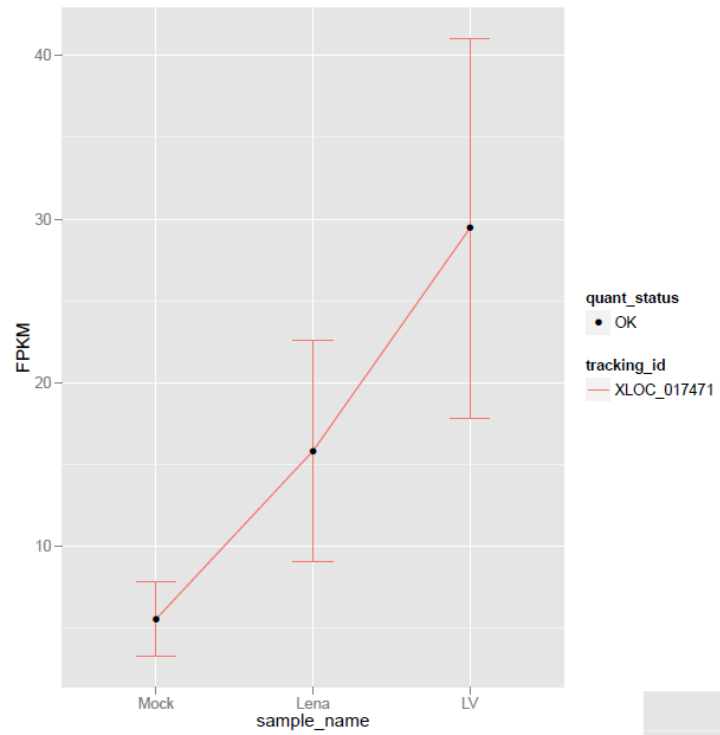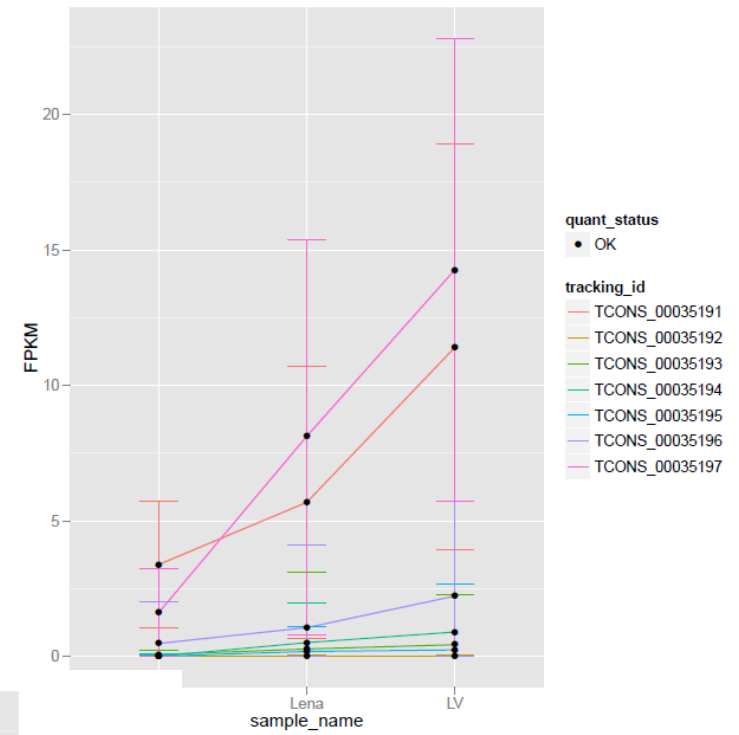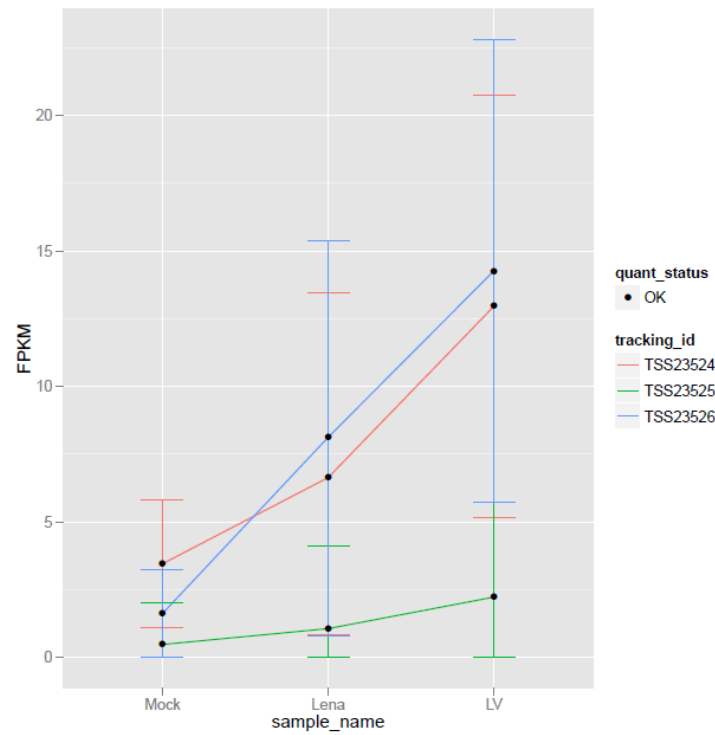

# TNFRSF10A

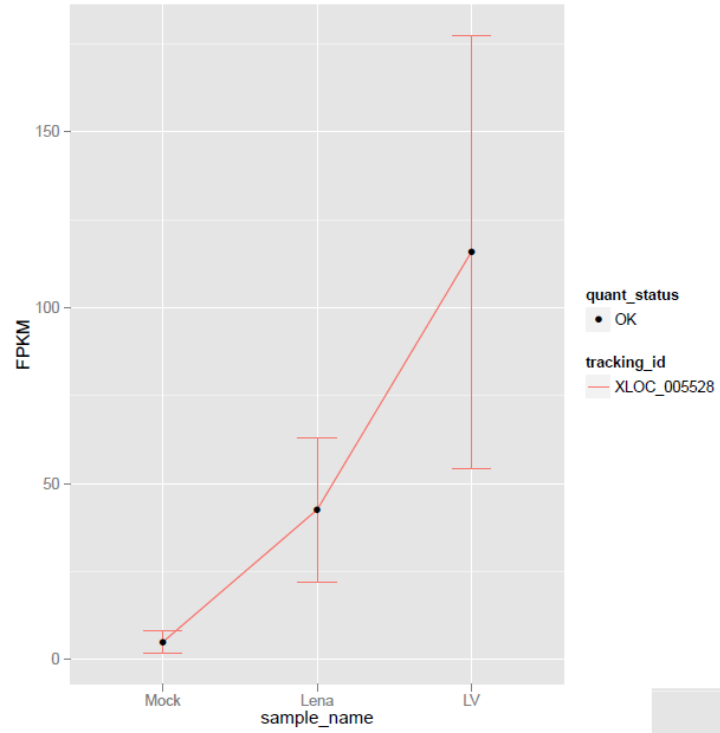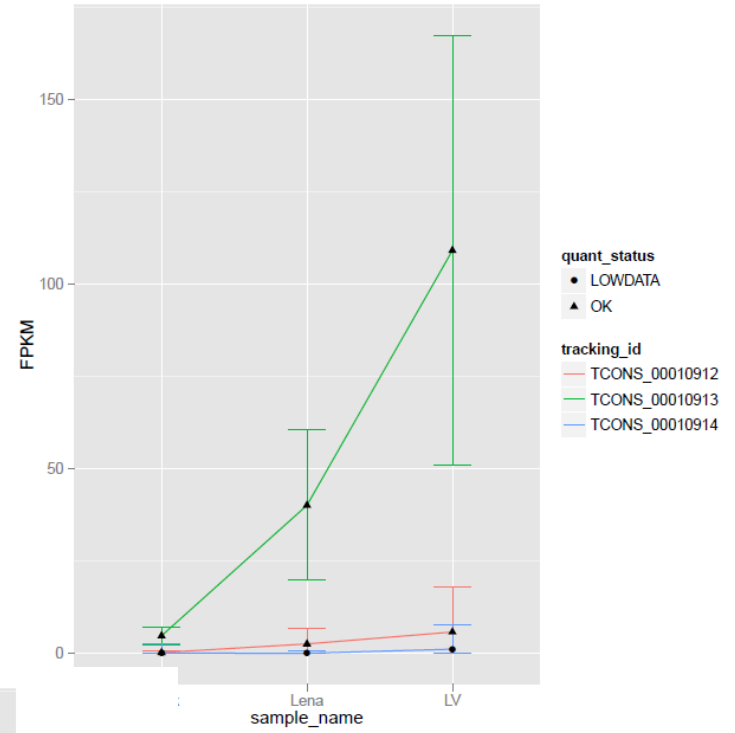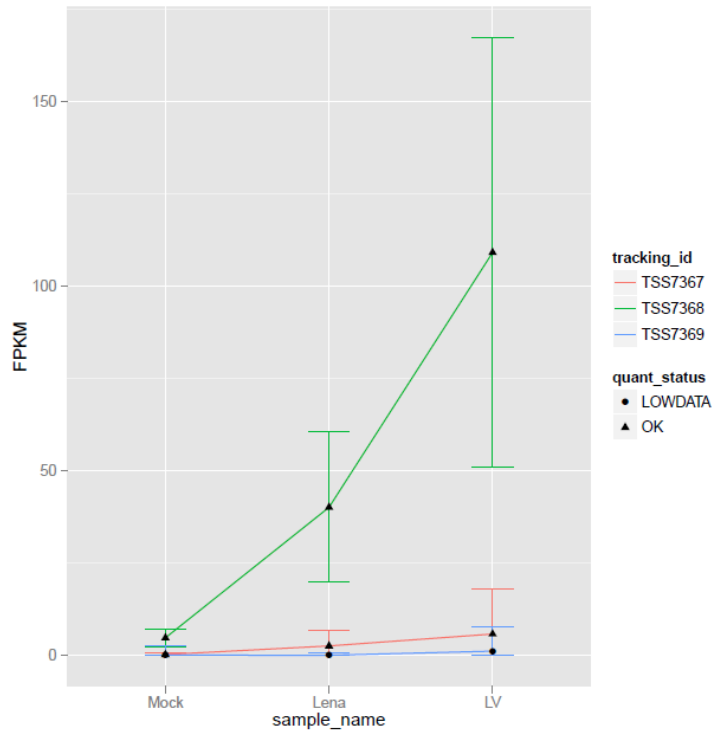



# PARP9

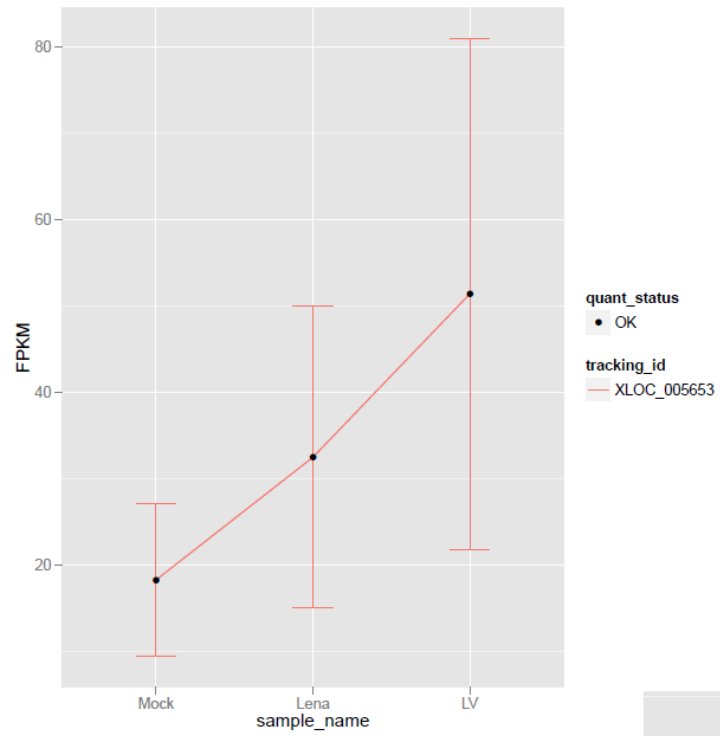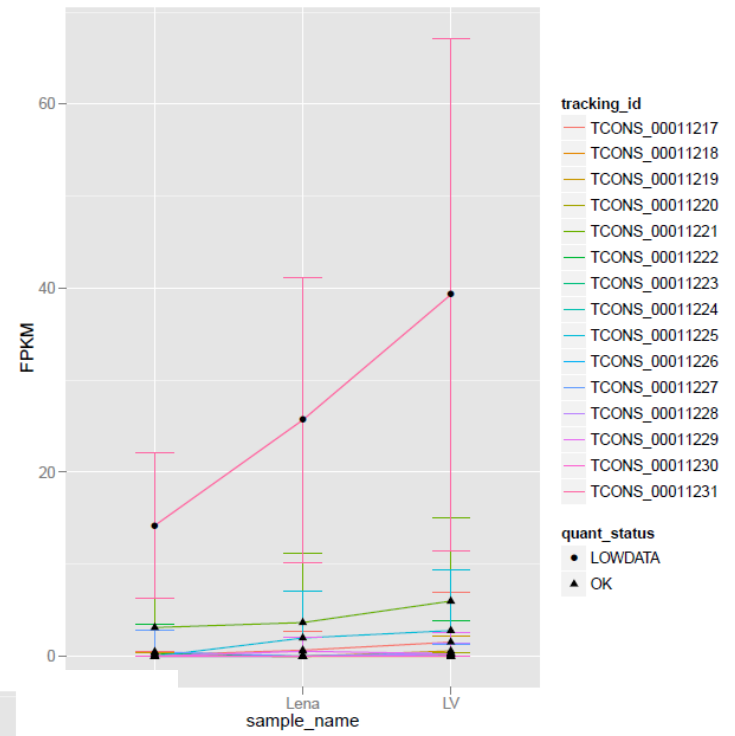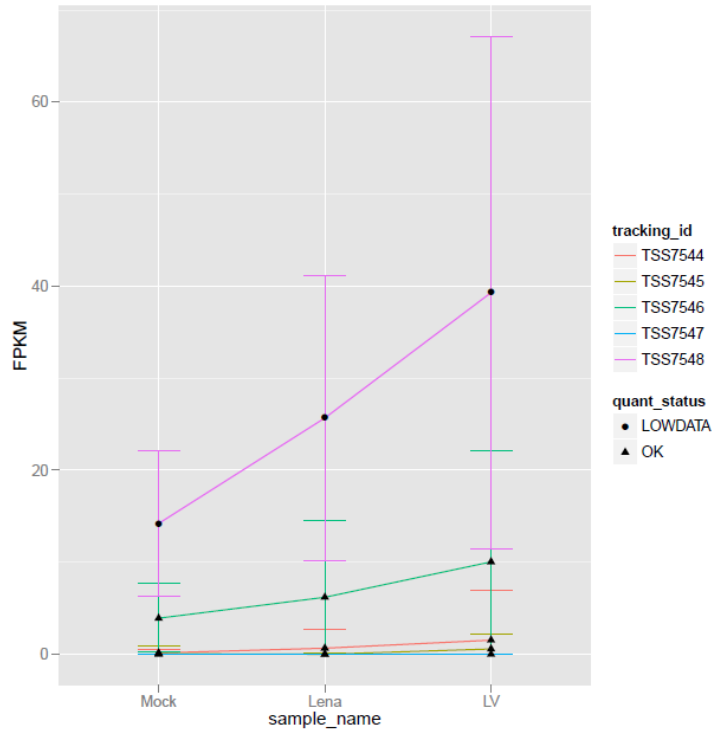

# PARP14

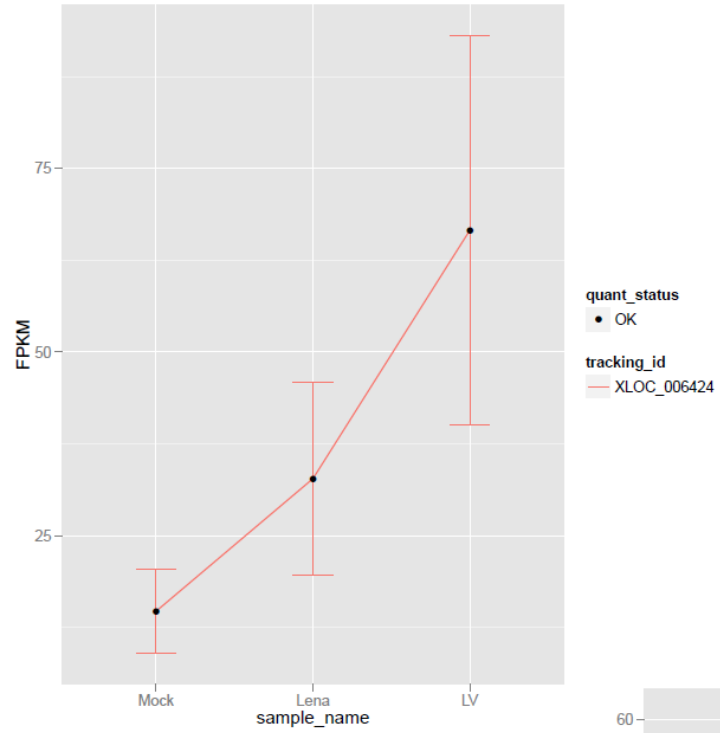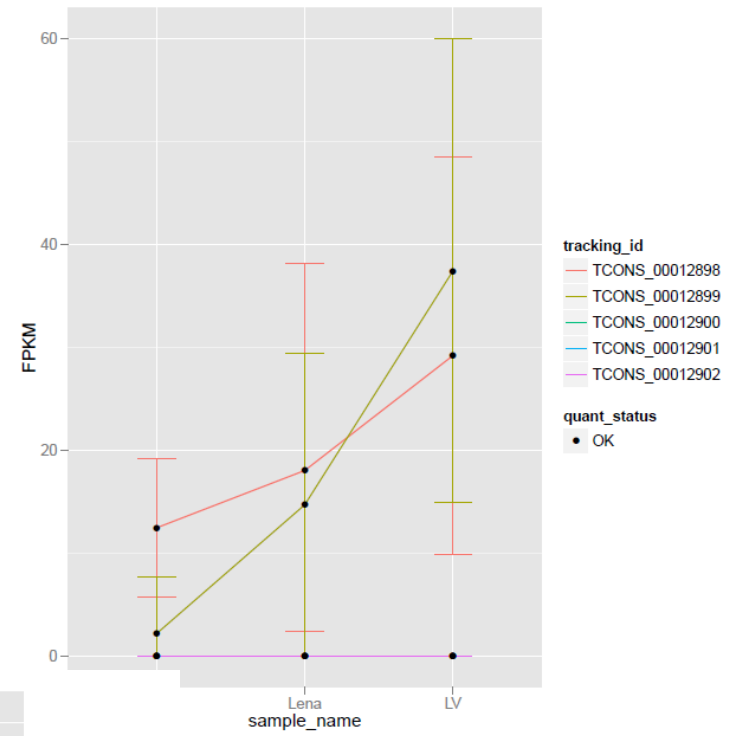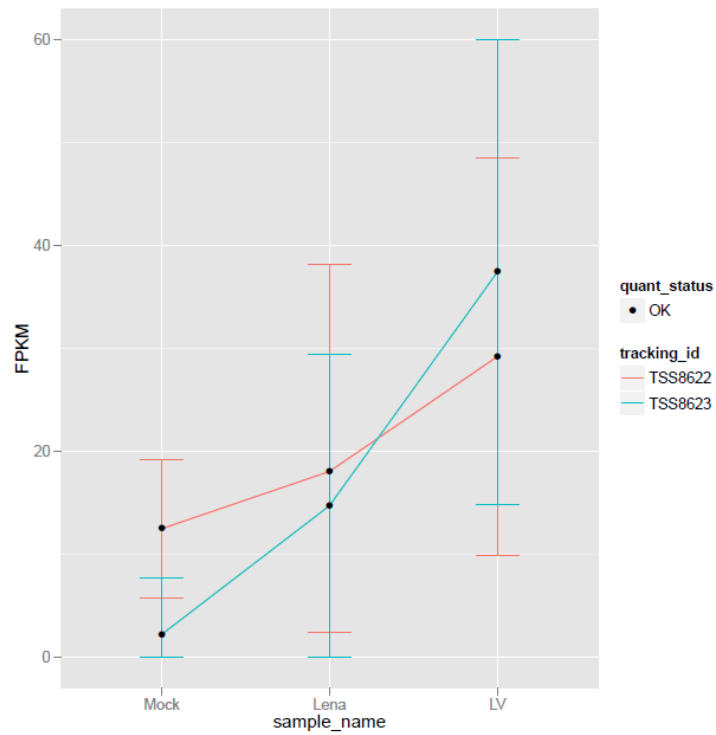

# CXCL10

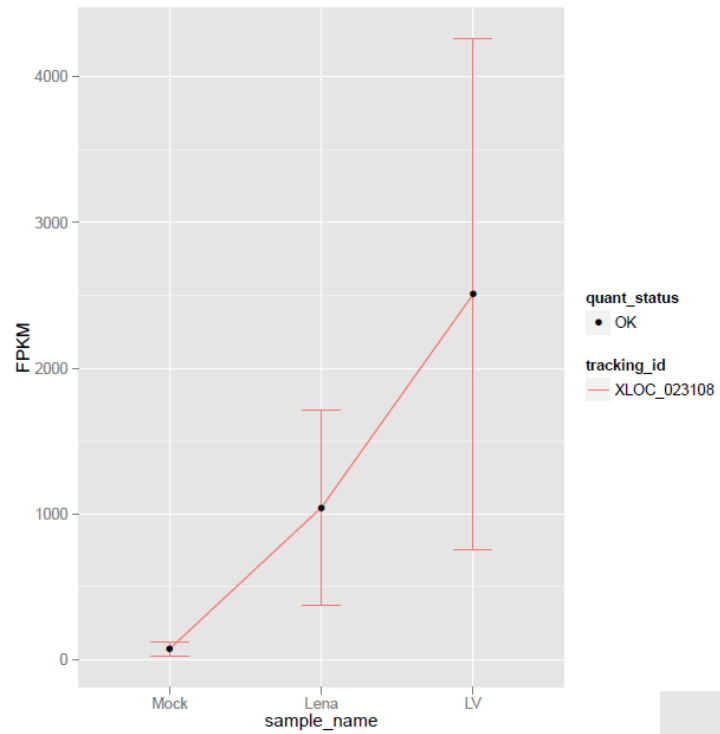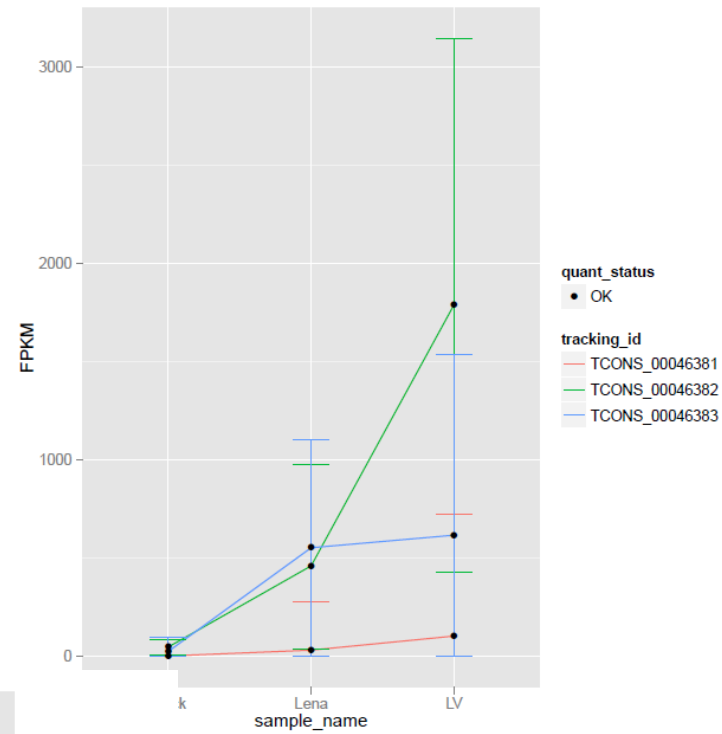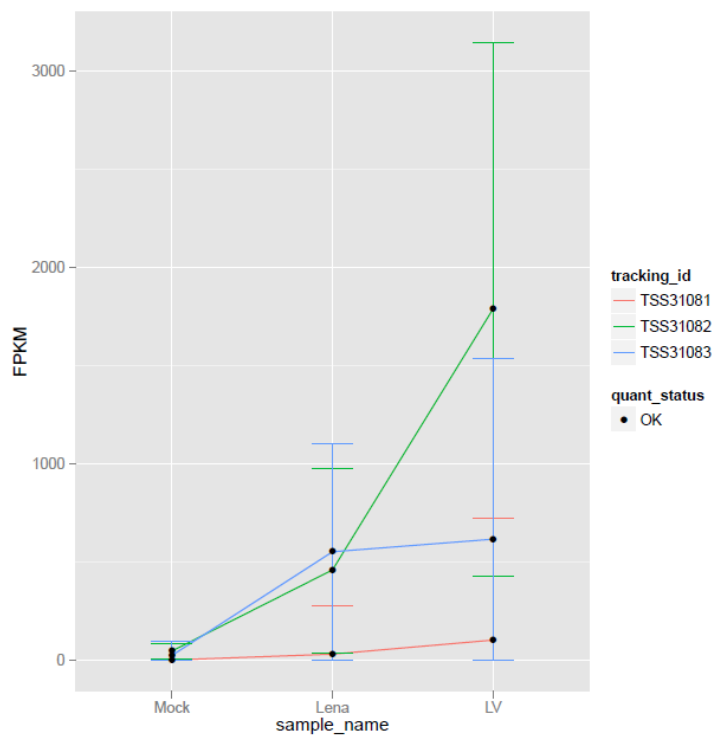

# IL15

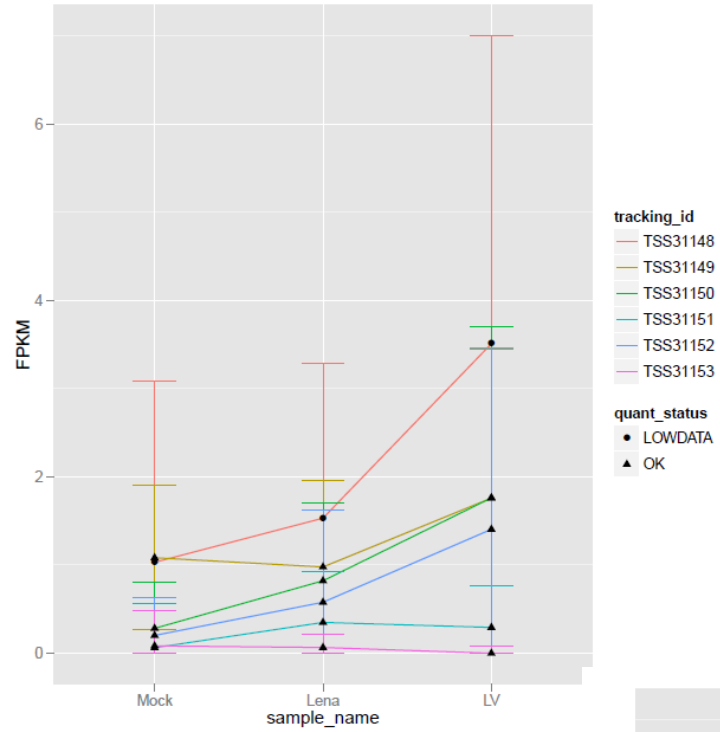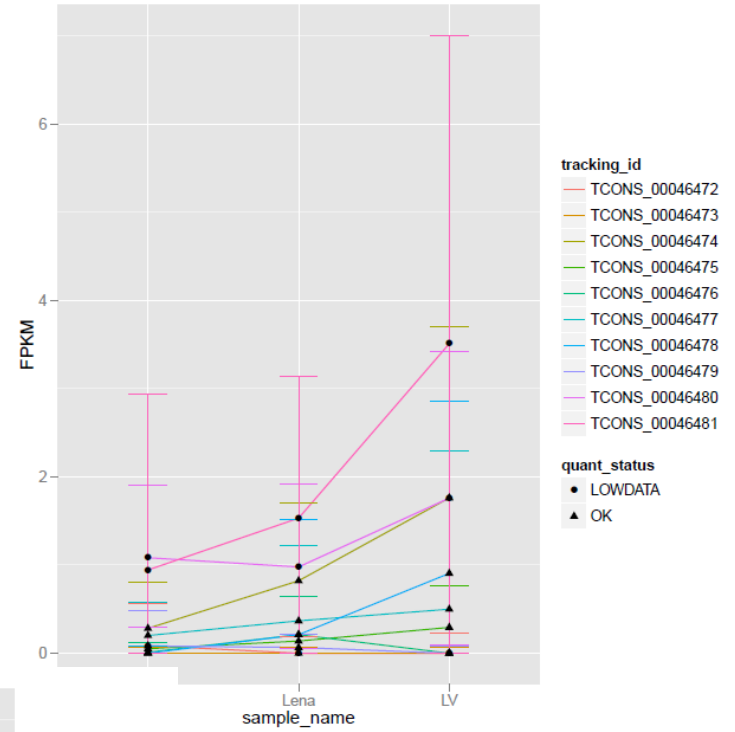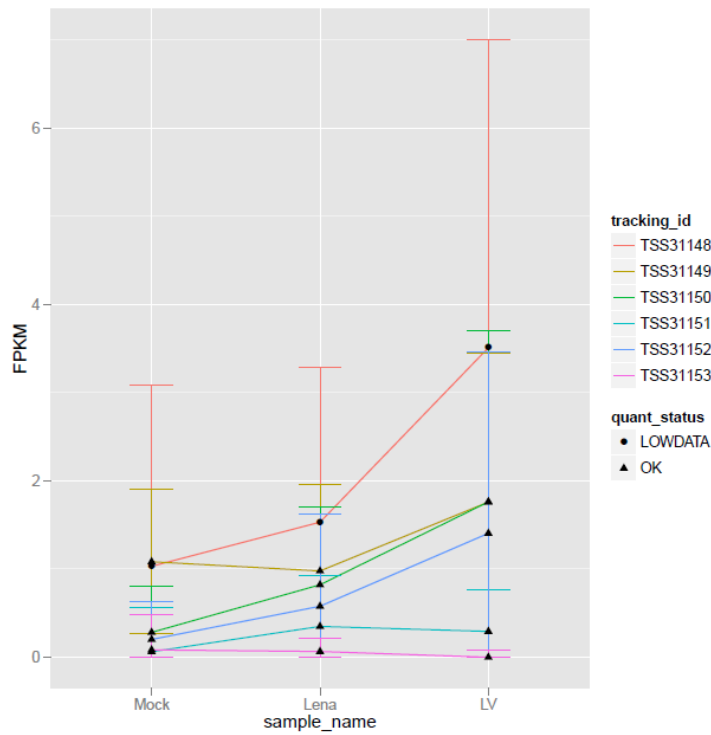

Supplement: pone.0091918.s005.pdf [file pone.0091918.s005.pdf]
