# Supplementary material for: RNA-Sequence Analysis of Primary Alveolar Macrophages after In Vitro Infection with Porcine Reproductive and Respiratory Syndrome Virus Strains of Differing Virulence
Source: PubMed Central journal article supplement (PMC3958415; doi:10.1371/journal.pone.0091918), 2014-03-18

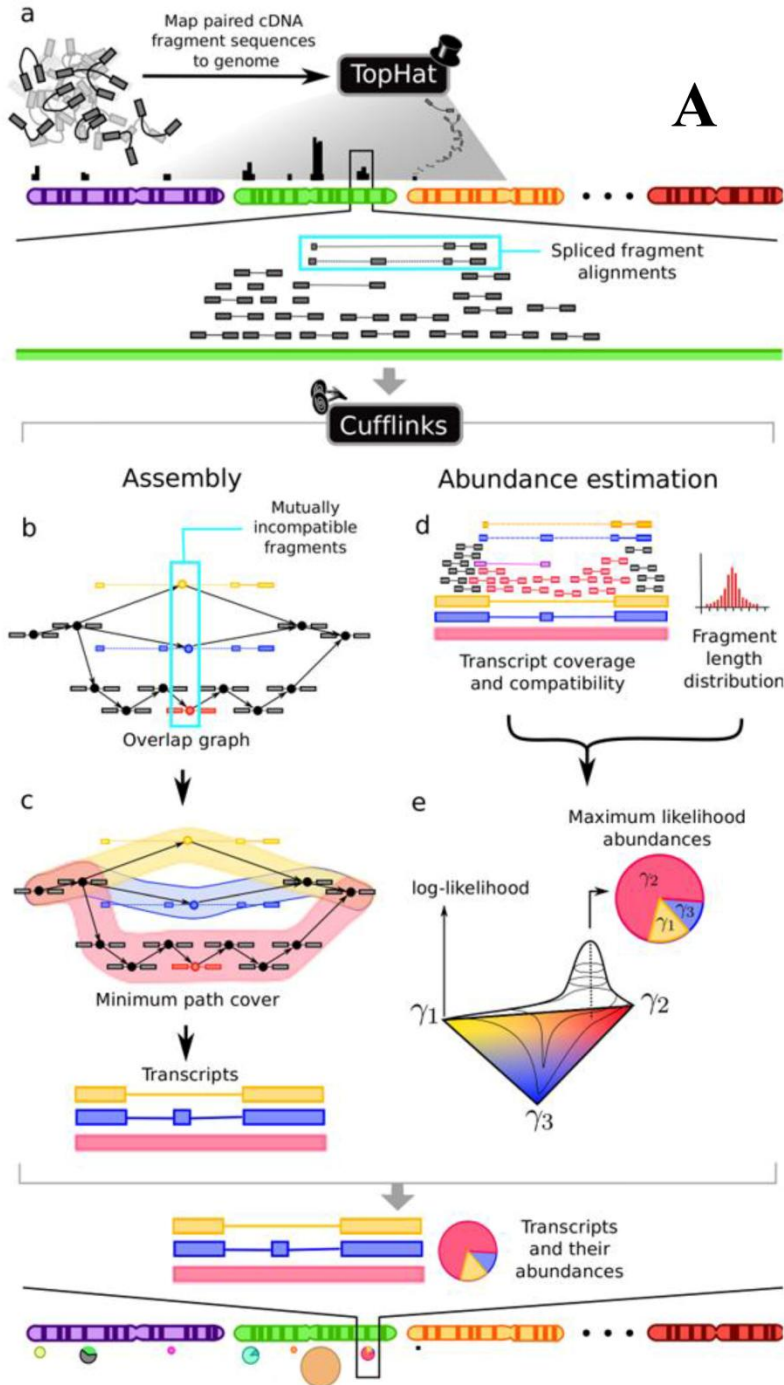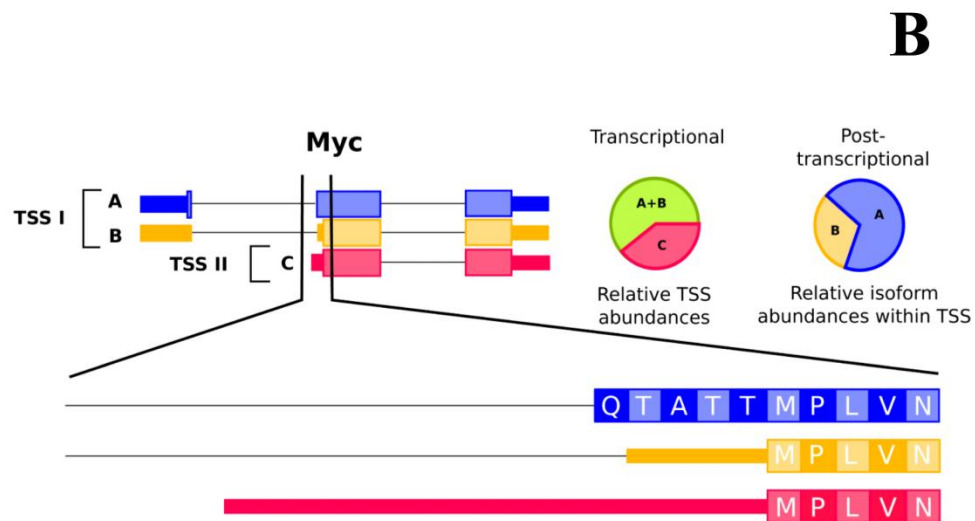

Supplement: pone.0091918.s004.pdf [file pone.0091918.s004.pdf]
